# Supplementary material
Source: publisher figshare collection journal article supplement (https://gsapubs.figshare.com/ndownloader/files/23313533)
Supplement: Supplementary file 1 [file 23313533]

## Sheet: upper RCG
upper Rocky Cape Group, Tasmania (this study)
Multi-collector ICPMS Data - Arizona Laserchron Centre
Methods follow:
Gehrels, G.E., Valencia, V.A., Ruiz, J., 2008. Enhanced precision, accuracy, efficiency, and spatial resolution of U-Pb ages by laser ablation-multicollector-inductively coupled plasma mass spectrometry. In: Geochem. Geophys. Geosyst. 9.
Gehrels, G., Pecha, M., 2014. Detrital zircon U-Pb geo-chronology and Hf isotope geochemistry of Paleozoic and Triassic passive margin strata of western North America. Geosphere 10 (1), 49–65.
							Blichert-Toft et al., 1997-176Lu decay constant (1.93x10-11)								*Scherer et al., 2001 - 176Lu decay constant (1.865x10-11)								Bizzarro et al., 2003 - 176Lu decay constant (1.983x10-11)								Soderlund et al. 2004 - 176Lu decay constant (1.867x10-11)
Analysis No.	Age	176Hf/177Hf	1se	176Lu/177Hf			176Hf/177Hf	epsilon Hf	1 se	T(DM)	T(DM)	Hf Chur (t)	Hf DM (t)		176Hf/177Hf	epsilon Hf	1 se	T(DM)	T(DM)	Hf Chur (t)	Hf DM (t)		176Hf/177Hf	epsilon Hf	1 se	T(DM)	T(DM)	Hf Chur (t)	Hf DM (t)		176Hf/177Hf	epsilon Hf	1 se	T(DM)	T(DM)	Hf Chur (t)	Hf DM (t)
	(Ma)						initial			(Ga)	crustal				initial			(Ga)	crustal				initial			(Ga)	crustal				initial			(Ga)	crustal
Jacob Quartzite, Jacob’s Boat Harbour, -40.92546, 145.61856
KK-2016-003-026	1591	0.281835	2.82752e-05	0.000850692			0.281809	2.56217	0.989631	1.91604	2.12994	0.281737	0.282054		0.28181	1.33819	0.989631	1.98282	2.2394	0.281772	0.282095		0.281808	3.56135	0.989631	1.86483	2.04582	0.281708	0.28202		0.28181	1.3372	0.989631	1.98069	2.23877	0.281772	0.282095
KK-2016-003-012	1509	0.282104	3.48606e-05	0.00124841			0.282067	9.80764	1.22012	1.57393	1.6173	0.281791	0.282116		0.282069	8.66214	1.22012	1.62878	1.70675	0.281824	0.282155		0.282066	10.7427	1.22012	1.53186	1.54854	0.281764	0.282085		0.282068	8.66076	1.22012	1.62704	1.70662	0.281824	0.282155
KK-2016-003-044	1238	0.282135	2.50421e-05	0.00127269			0.282104	4.78801	0.876475	1.53319	1.71902	0.281969	0.282322		0.282105	3.85482	0.876475	1.58662	1.80518	0.281997	0.282354		0.282103	5.54961	0.876475	1.49221	1.65285	0.281947	0.282297		0.282105	3.85367	0.876475	1.58492	1.80465	0.281997	0.282354
KK-2016-003-038	1198	0.281994	2.64102e-05	0.00226626			0.281941	-1.93794	0.924357	1.77072	2.10237	0.281995	0.282353		0.281943	-2.81152	0.924357	1.83244	2.19867	0.282022	0.282383		0.281939	-1.22501	0.924357	1.7234	2.02843	0.281974	0.282328		0.281943	-2.81349	0.924357	1.83048	2.19772	0.282022	0.282383
KK-2016-003-036	1270	0.282141	2.72798e-05	0.000665807			0.282125	6.25518	0.954794	1.50075	1.65298	0.281948	0.282298		0.282125	5.27887	0.954794	1.55306	1.73886	0.281976	0.282331		0.282124	7.05199	0.954794	1.46064	1.58702	0.281925	0.282272		0.282125	5.27825	0.954794	1.55139	1.7384	0.281976	0.282331
KK-2016-003-082	1313	0.282212	2.80968e-05	0.00171638			0.282168	8.79531	0.983388	1.44584	1.52863	0.28192	0.282265		0.282169	7.81737	0.983388	1.49623	1.60934	0.281949	0.282299		0.282167	9.59348	0.983388	1.40719	1.46662	0.281896	0.282238		0.282169	7.81573	0.983388	1.49463	1.60913	0.281949	0.282299
KK-2016-003-083	1211	0.282125	3.26889e-05	0.00110084			0.282099	3.97663	1.14411	1.53958	1.74825	0.281987	0.282343		0.2821	3.05948	1.14411	1.59324	1.83507	0.282014	0.282374		0.282098	4.72512	1.14411	1.49843	1.68158	0.281965	0.282318		0.2821	3.05851	1.14411	1.59153	1.83446	0.282014	0.282374
KK-2016-003-104	1236	0.281875	3.16868e-05	0.000575268			0.281861	-3.86819	1.10904	1.84967	2.25018	0.28197	0.282324		0.281862	-4.81934	1.10904	1.91414	2.35538	0.281998	0.282356		0.281861	-3.09194	1.10904	1.80024	2.1694	0.281948	0.282298		0.281862	-4.81986	1.10904	1.91209	2.35422	0.281998	0.282356
KK-2016-003-123	1189	0.282152	3.3221e-05	0.00211872			0.282103	3.60546	1.16274	1.54454	1.75412	0.282001	0.28236		0.282105	2.73396	1.16274	1.59838	1.83878	0.282028	0.28239		0.282102	4.31669	1.16274	1.50326	1.68911	0.28198	0.282335		0.282105	2.73213	1.16274	1.59666	1.8382	0.282028	0.28239
KK-2016-003-134	1357	0.282197	3.05177e-05	0.00114969			0.282167	9.77886	1.06812	1.44413	1.50151	0.281891	0.282232		0.282168	8.7489	1.06812	1.49446	1.58353	0.281921	0.282267		0.282166	10.6195	1.06812	1.40553	1.43849	0.281866	0.282204		0.282168	8.74776	1.06812	1.49286	1.58336	0.281921	0.282267
KK-2016-003-136	1225	0.281968	3.92832e-05	0.00145944			0.281933	-1.57341	1.37491	1.7673	2.10095	0.281978	0.282332		0.281935	-2.49054	1.37491	1.82889	2.19927	0.282005	0.282364		0.281932	-0.824924	1.37491	1.72006	2.02546	0.281956	0.282307		0.281935	-2.49184	1.37491	1.82693	2.19831	0.282005	0.282364
KK-2016-003-129	1293	0.282185	3.29821e-05	0.00109475			0.282157	7.94692	1.15437	1.45875	1.56586	0.281933	0.282281		0.282158	6.96537	1.15437	1.50959	1.64856	0.281962	0.282314		0.282156	8.74801	1.15437	1.41976	1.50232	0.28191	0.282254		0.282158	6.96434	1.15437	1.50798	1.64824	0.281962	0.282314
KK-2016-003-144	1222	0.282115	2.71371e-05	0.000780641			0.282096	4.13432	0.949799	1.54027	1.74704	0.28198	0.282335		0.282097	3.19938	0.949799	1.59395	1.83466	0.282007	0.282366		0.282096	4.89734	0.949799	1.4991	1.67974	0.281958	0.282309		0.282097	3.19869	0.949799	1.59224	1.83405	0.282007	0.282366
KK-2016-003-150	1315	0.282212	2.77647e-05	0.00116718			0.282182	9.3371	0.971764	1.42492	1.49649	0.281919	0.282264		0.282183	8.3405	0.971764	1.47459	1.57727	0.281948	0.282298		0.282181	10.1505	0.971764	1.38684	1.43443	0.281895	0.282236		0.282183	8.33938	0.971764	1.47301	1.57706	0.281948	0.282298
KK-2016-003-151	1218	0.282171	2.67512e-05	0.000592497			0.282157	6.2025	0.936292	1.45761	1.61595	0.281982	0.282338		0.282158	5.2651	0.936292	1.50841	1.69943	0.282009	0.282369		0.282157	6.96753	0.936292	1.41865	1.55183	0.28196	0.282312		0.282158	5.26458	0.936292	1.5068	1.69895	0.282009	0.282369
KK-2016-003-058	1455	0.282101	3.49858e-05	0.00123309			0.282066	8.51133	1.2245	1.5769	1.65618	0.281826	0.282157		0.282068	7.40771	1.2245	1.63185	1.74561	0.281859	0.282195		0.282065	9.41217	1.2245	1.53475	1.58746	0.2818	0.282127		0.282068	7.4064	1.2245	1.63011	1.74538	0.281859	0.282195
KK-2016-003-056	1445	0.281998	3.62464e-05	0.000646928			0.281979	5.18753	1.26862	1.69098	1.85464	0.281833	0.282165		0.28198	4.07203	1.26862	1.74992	1.95171	0.281865	0.282202		0.281979	6.09805	1.26862	1.64579	1.78006	0.281807	0.282135		0.28198	4.07135	1.26862	1.74804	1.95121	0.281865	0.282202
KK-2016-003-085	1451	0.282163	3.82379e-05	0.00194148			0.282108	9.89504	1.33833	1.52205	1.567	0.281829	0.28216		0.28211	8.81875	1.33833	1.5751	1.6518	0.281861	0.282198		0.282106	10.7736	1.33833	1.48137	1.50184	0.281803	0.28213		0.28211	8.8167	1.33833	1.57341	1.65171	0.281861	0.282198
KK-2016-003-122	1449	0.282057	3.79172e-05	0.000651396			0.282039	7.38478	1.3271	1.61212	1.72152	0.28183	0.282162		0.282039	6.266	1.3271	1.6683	1.81425	0.281863	0.282199		0.282038	8.29798	1.3271	1.56903	1.65026	0.281804	0.282132		0.282039	6.26531	1.3271	1.66651	1.81391	0.281863	0.282199
KK-2016-003-154	1222	0.28218	2.56107e-05	0.0012707			0.28215	6.0283	0.896376	1.47207	1.62984	0.28198	0.282335		0.282151	5.10731	0.896376	1.52337	1.71263	0.282007	0.282366		0.282149	6.77994	0.896376	1.43272	1.56625	0.281958	0.282309		0.282151	5.10618	0.896376	1.52174	1.71218	0.282007	0.282366
KK-2016-003-161	1226	0.281857	3.97857e-05	0.00113568			0.28183	-5.22657	1.3925	1.90171	2.32551	0.281977	0.282332		0.281831	-6.15348	1.3925	1.96799	2.43198	0.282004	0.282363		0.281829	-4.4701	1.3925	1.85089	2.24377	0.281955	0.282306		0.281831	-6.15449	1.3925	1.96588	2.43075	0.282004	0.282363
KK-2016-003-176	1214	0.282071	3.0566e-05	0.000720309			0.282054	2.44897	1.06981	1.59631	1.8449	0.281985	0.282341		0.282055	1.51874	1.06981	1.65195	1.93572	0.282012	0.282372		0.282054	3.20814	1.06981	1.55365	1.77515	0.281963	0.282315		0.282055	1.51811	1.06981	1.65018	1.93498	0.282012	0.282372
KK-2016-003-179	1211	0.282173	3.15685e-05	0.000717435			0.282156	5.99058	1.1049	1.46038	1.62365	0.281987	0.282343		0.282156	5.06229	1.1049	1.51128	1.70699	0.282014	0.282374		0.282155	6.74817	1.1049	1.42135	1.55965	0.281965	0.282318		0.282156	5.06166	1.1049	1.50966	1.70649	0.282014	0.282374
KK-2016-003-171	1333	0.282143	2.42446e-05	0.000867345			0.282121	7.59439	0.848561	1.50546	1.61872	0.281907	0.28225		0.282122	6.57449	0.848561	1.55793	1.70463	0.281936	0.282284		0.28212	8.42682	0.848561	1.46522	1.55272	0.281883	0.282222		0.282122	6.57365	0.848561	1.55626	1.70429	0.281936	0.282284
KK-2016-003-172	1254	0.281958	3.78547e-05	0.00192145			0.281911	-1.68183	1.32491	1.80292	2.13011	0.281959	0.28231		0.281913	-2.60756	1.32491	1.86576	2.22921	0.281986	0.282342		0.28191	-0.926309	1.32491	1.75474	2.05402	0.281936	0.282284		0.281913	-2.60931	1.32491	1.86376	2.22827	0.281986	0.282342
KK-2016-003-071	1383	0.282179	3.00631e-05	0.00197171			0.282126	8.92878	1.05221	1.50149	1.57452	0.281874	0.282212		0.282127	7.90551	1.05221	1.55382	1.65789	0.281905	0.282248		0.282124	9.76399	1.05221	1.46135	1.51046	0.281849	0.282183		0.282127	7.90352	1.05221	1.55215	1.65772	0.281905	0.282248
KK-2016-003-013	1395	0.282181	5.40283e-05	0.00314793			0.282095	8.14156	1.89099	1.54731	1.63274	0.281866	0.282203		0.282098	7.14808	1.89099	1.60124	1.71584	0.281897	0.282239		0.282093	8.95245	1.89099	1.50596	1.56889	0.281841	0.282174		0.282098	7.14488	1.89099	1.59953	1.7157	0.281897	0.282239
KK-2016-003-091	1387	0.282169	3.28975e-05	0.00209233			0.282112	8.53244	1.15141	1.52078	1.60226	0.281871	0.282209		0.282114	7.51013	1.15141	1.57379	1.68639	0.281902	0.282245		0.28211	9.36687	1.15141	1.48014	1.53761	0.281846	0.28218		0.282114	7.50802	1.15141	1.5721	1.6862	0.281902	0.282245
KK-2016-003-095	1392	0.281967	2.77438e-05	0.00110718			0.281937	2.43966	0.971035	1.75273	1.98345	0.281868	0.282205		0.281938	1.38175	0.971035	1.81382	2.08249	0.281899	0.282241		0.281936	3.30314	0.971035	1.70589	1.90736	0.281843	0.282176		0.281938	1.38063	0.971035	1.81188	2.08182	0.281899	0.282241
KK-2016-003-107	1386	0.28221	2.87646e-05	0.00118705			0.282178	10.87	1.00676	1.4275	1.45599	0.281872	0.28221		0.282179	9.8185	1.00676	1.47726	1.53713	0.281903	0.282245		0.282177	11.7283	1.00676	1.38935	1.39363	0.281847	0.282181		0.282179	9.81731	1.00676	1.47567	1.53704	0.281903	0.282245
KK-2016-003-80	1398	0.28208	6.34588e-05	0.00181605			0.282031	5.91039	2.22106	1.63073	1.77349	0.281864	0.282201		0.282032	4.87087	2.22106	1.68756	1.86418	0.281895	0.282237		0.282029	6.75887	2.22106	1.58714	1.70382	0.281839	0.282172		0.282032	4.86902	2.22106	1.68575	1.8638	0.281895	0.282237
KK-2016-003-118	1564	0.281813	2.87868e-05	0.000597664			0.281795	1.43339	1.00754	1.93274	2.17869	0.281755	0.282074		0.281796	0.221604	1.00754	2.0001	2.28968	0.281789	0.282114		0.281794	2.4226	1.00754	1.88108	2.0934	0.281726	0.282041		0.281796	0.220921	1.00754	1.99795	2.28894	0.281789	0.282114
KK-2016-003-113	1570	0.282026	2.87577e-05	0.00300724			0.281934	6.49394	1.00652	1.76146	1.87039	0.281751	0.28207		0.281937	5.36662	1.00652	1.82285	1.96556	0.281786	0.28211		0.281931	7.41419	1.00652	1.71438	1.79725	0.281722	0.282037		0.281937	5.36317	1.00652	1.8209	1.96536	0.281786	0.28211
KK-2016-003-158	1567	0.282007	3.20146e-05	0.00224021			0.281938	6.57597	1.12051	1.75164	1.86298	0.281753	0.282072		0.28194	5.42231	1.12051	1.81269	1.95967	0.281787	0.282112		0.281936	7.51773	1.12051	1.70483	1.78867	0.281724	0.282039		0.28194	5.41975	1.12051	1.81075	1.95942	0.281787	0.282112
KK-2016-003-047	1422	0.282107	3.59962e-05	0.00116114			0.282075	8.03832	1.25987	1.56631	1.66004	0.281848	0.282183		0.282076	6.95812	1.25987	1.6209	1.74894	0.28188	0.282219		0.282074	8.92002	1.25987	1.52445	1.59174	0.281822	0.282153		0.282076	6.95692	1.25987	1.61917	1.74866	0.28188	0.282219
Huon River Formation: Scotts Peak Road, -42.91062, 146.36320
KK-2016-129-008	1169	0.282059	2.7944e-05	0.000590751			0.282045	1.09203	0.978039	1.60734	1.89361	0.282014	0.282375		0.282046	0.193695	0.978039	1.66336	1.9852	0.28204	0.282405		0.282045	1.82515	0.978039	1.56438	1.82329	0.281993	0.28235		0.282046	0.193194	0.978039	1.66157	1.98436	0.28204	0.282405
KK-2016-129-024	1216	0.281963	4.03681e-05	0.00204243			0.281915	-2.43864	1.41288	1.80191	2.14706	0.281984	0.282339		0.281917	-3.33205	1.41288	1.86471	2.24565	0.28201	0.28237		0.281914	-1.70951	1.41288	1.75375	2.07135	0.281962	0.282314		0.281916	-3.33385	1.41288	1.86271	2.24466	0.28201	0.28237
KK-2016-129-045	1290	0.282132	3.46755e-05	0.00204557			0.28208	5.15264	1.21364	1.56956	1.73676	0.281935	0.282283		0.282082	4.20269	1.21364	1.62426	1.82325	0.281964	0.282316		0.282079	5.92794	1.21364	1.52761	1.67033	0.281912	0.282256		0.282082	4.20077	1.21364	1.62252	1.8228	0.281964	0.282316
KK-2016-129-049	1212	0.282059	3.99074e-05	0.00181671			0.282016	1.04146	1.39676	1.66049	1.93009	0.281986	0.282342		0.282017	0.144275	1.39676	1.71836	2.02172	0.282013	0.282373		0.282014	1.77366	1.39676	1.61611	1.85973	0.281964	0.282317		0.282017	0.142678	1.39676	1.71652	2.02096	0.282013	0.282373
KK-2016-129-061	1172	0.282006	3.4433e-05	0.000906592			0.281985	-0.960451	1.20515	1.69106	2.02218	0.282012	0.282373		0.281986	-1.85224	1.20515	1.74999	2.1176	0.282038	0.282402		0.281985	-0.232676	1.20515	1.64586	1.94891	0.281991	0.282348		0.281986	-1.85301	1.20515	1.74812	2.11663	0.282038	0.282402
KK-2016-129-054	1367	0.282243	3.14996e-05	0.00188327			0.282193	10.931	1.10249	1.40962	1.43748	0.281884	0.282224		0.282194	9.91685	1.10249	1.45875	1.51609	0.281915	0.282259		0.282191	11.7588	1.10249	1.37195	1.37708	0.28186	0.282196		0.282194	9.91498	1.10249	1.45719	1.51605	0.281915	0.282259
KK-2016-129-053	1390	0.282219	3.91538e-05	0.00200931			0.282165	10.4779	1.37038	1.44718	1.48352	0.281869	0.282207		0.282166	9.45038	1.37038	1.49761	1.56393	0.2819	0.282243		0.282163	11.3166	1.37038	1.4085	1.42172	0.281844	0.282178		0.282166	9.44834	1.37038	1.49601	1.56388	0.2819	0.282243
KK-2016-129-057	1369	0.282006	2.93942e-05	0.000850314			0.281983	3.53473	1.0288	1.68938	1.89802	0.281883	0.282223		0.281984	2.48637	1.0288	1.74826	1.99418	0.281913	0.282258		0.281982	4.3904	1.0288	1.64423	1.82415	0.281858	0.282194		0.281983	2.48552	1.0288	1.74639	1.99356	0.281913	0.282258
KK-2016-129-066	1226	0.282125	2.59427e-05	0.00159657			0.282087	3.89916	0.907996	1.55978	1.76467	0.281977	0.282332		0.282088	2.9847	0.907996	1.61414	1.85148	0.282004	0.282363		0.282086	4.64546	0.907996	1.51809	1.69801	0.281955	0.282306		0.282088	2.98328	0.907996	1.61241	1.8509	0.282004	0.282363
KK-2016-129-099	1372	0.282147	3.72436e-05	0.00212704			0.28209	7.4088	1.30353	1.55201	1.66044	0.281881	0.282221		0.282092	6.39911	1.30353	1.6061	1.74609	0.281912	0.282256		0.282088	8.23291	1.30353	1.51053	1.59463	0.281856	0.282192		0.282092	6.39699	1.30353	1.60438	1.74583	0.281912	0.282256
KK-2016-129-106	1433	0.282039	2.97184e-05	0.000950649			0.282012	6.07019	1.04014	1.64935	1.79068	0.281841	0.282174		0.282013	4.97445	1.04014	1.70684	1.88465	0.281873	0.282211		0.282011	6.96458	1.04014	1.60527	1.71848	0.281815	0.282144		0.282013	4.97346	1.04014	1.70501	1.88423	0.281873	0.282211
KK-2016-129-115	1464	0.282181	2.61491e-05	0.0035467			0.28208	9.19661	0.915218	1.56477	1.62053	0.281821	0.282151		0.282083	8.16618	0.915218	1.61931	1.70383	0.281853	0.282188		0.282077	10.0377	0.915218	1.52295	1.55652	0.281794	0.28212		0.282083	8.1624	0.915218	1.61758	1.70382	0.281853	0.282188
KK-2016-129-116	1273	0.282238	0.000117397	0.00149473			0.282201	9.03117	4.1089	1.40165	1.48299	0.281946	0.282296		0.282202	8.07714	4.1089	1.4505	1.56166	0.281974	0.282328		0.2822	9.8098	4.1089	1.36419	1.42256	0.281923	0.282269		0.282202	8.07575	4.1089	1.44895	1.56144	0.281974	0.282328
KK-2016-129-122	1358	0.282236	5.09922e-05	0.00205867			0.282182	10.3367	1.78473	1.42536	1.46755	0.28189	0.282231		0.282184	9.33506	1.78473	1.47503	1.54658	0.28192	0.282266		0.28218	11.1542	1.78473	1.38726	1.40683	0.281866	0.282203		0.282184	9.33302	1.78473	1.47345	1.54651	0.28192	0.282266
KK-2016-129-085	1451	0.282113	3.41844e-05	0.00101859			0.282084	9.05912	1.19645	1.552	1.61903	0.281829	0.28216		0.282085	7.95119	1.19645	1.60609	1.70759	0.281861	0.282198		0.282084	9.96348	1.19645	1.51052	1.55096	0.281803	0.28213		0.282085	7.95011	1.19645	1.60437	1.70739	0.281861	0.282198
KK-2016-129-006	1753	0.281728	3.51746e-05	0.0012425			0.281685	1.96878	1.23111	2.08036	2.29182	0.28163	0.28193		0.281686	0.631982	1.23111	2.15287	2.40977	0.281669	0.281975		0.281684	3.06018	1.23111	2.02476	2.20116	0.281598	0.281893		0.281686	0.630384	1.23111	2.15056	2.40917	0.281669	0.281975
KK-2016-129-012	1741	0.281897	5.57994e-05	0.00196568			0.28183	6.84263	1.95298	1.88874	1.98089	0.281637	0.281939		0.281832	5.54469	1.95298	1.95457	2.08636	0.281676	0.281984		0.281828	7.90231	1.95298	1.83826	1.89981	0.281606	0.281902		0.281832	5.54218	1.95298	1.95247	2.08615	0.281676	0.281984
KK-2016-129-055	1754	0.281665	7.42736e-05	0.00370524			0.281538	-3.24081	2.59958	2.31433	2.61311	0.281629	0.281929		0.281542	-4.47461	2.59958	2.39499	2.73514	0.281668	0.281974		0.281534	-2.23349	2.59958	2.25247	2.51935	0.281597	0.281892		0.281542	-4.47938	2.59958	2.39242	2.73439	0.281668	0.281974
KK-2016-129-072	1775	0.281587	3.71574e-05	0.000901054			0.281555	-2.11338	1.30051	2.24855	2.56015	0.281615	0.281913		0.281557	-3.48147	1.30051	2.32692	2.68841	0.281655	0.281959		0.281555	-0.996401	1.30051	2.18845	2.46158	0.281583	0.281875		0.281556	-3.48265	1.30051	2.32442	2.68751	0.281655	0.281959
KK-2016-129-089	1765	0.281632	4.78061e-05	0.00180707			0.28157	-1.84237	1.67321	2.24137	2.53577	0.281622	0.28192		0.281572	-3.16435	1.67321	2.31949	2.66055	0.281661	0.281966		0.281568	-0.763055	1.67321	2.18147	2.43988	0.281589	0.281883		0.281572	-3.16669	1.67321	2.31701	2.65974	0.281661	0.281966
Irby Siltstone Sisters Beach, -40.90959, 145.54773
KK-2016-004-019	1464	0.282244	2.97478e-05	0.00132206			0.282206	13.6807	1.04117	1.38709	1.3408	0.281821	0.282151		0.282207	12.5726	1.04117	1.43543	1.41977	0.281853	0.282188		0.282205	14.5853	1.04117	1.35002	1.2801	0.281794	0.28212		0.282207	12.5711	1.04117	1.43389	1.41991	0.281853	0.282188
KK-2016-004-024	1303	0.282373	4.86926e-05	0.00260392			0.282307	13.4994	1.70424	1.25356	1.22764	0.281927	0.282273		0.282309	12.5559	1.70424	1.29725	1.29628	0.281955	0.282306		0.282305	14.2694	1.70424	1.22005	1.17489	0.281903	0.282246		0.282309	12.5535	1.70424	1.29586	1.29644	0.281955	0.282306
KK-2016-004-025	1189	0.2822	3.03327e-05	0.000755734			0.282183	6.43711	1.06165	1.4249	1.57893	0.282001	0.28236		0.282183	5.52714	1.06165	1.47456	1.66015	0.282028	0.28239		0.282182	7.17973	1.06165	1.38681	1.51655	0.28198	0.282335		0.282183	5.52649	1.06165	1.47298	1.65969	0.282028	0.28239
KK-2016-004-031	1313	0.282259	7.29578e-05	0.00319415			0.282177	9.11752	2.55352	1.43841	1.5086	0.28192	0.282265		0.28218	8.1854	2.55352	1.48854	1.58569	0.281949	0.282299		0.282175	9.87829	2.55352	1.39996	1.44937	0.281896	0.282238		0.28218	8.18235	2.55352	1.48694	1.58559	0.281949	0.282299
KK-2016-004-034	1339	0.282194	3.34305e-05	0.00170803			0.28215	8.75694	1.17007	1.46957	1.55115	0.281903	0.282246		0.282151	7.75882	1.17007	1.52079	1.63324	0.281932	0.28228		0.282148	9.57159	1.17007	1.43029	1.48807	0.281879	0.282218		0.282151	7.75716	1.17007	1.51916	1.63303	0.281932	0.28228
KK-2016-004-047	1248	0.282363	5.3199e-05	0.0036144			0.282275	11.0825	1.86197	1.30431	1.33593	0.281963	0.282315		0.282278	10.2099	1.86197	1.34977	1.40505	0.28199	0.282347		0.282273	11.7946	1.86197	1.26945	1.28283	0.28194	0.282289		0.282278	10.2066	1.86197	1.34832	1.4051	0.28199	0.282347
KK-2016-004-049	1415	0.282231	2.78832e-05	0.00178622			0.282182	11.6711	0.975914	1.422	1.42846	0.281853	0.282188		0.282183	10.6169	0.975914	1.47156	1.50812	0.281884	0.282224		0.28218	12.5315	0.975914	1.38399	1.36725	0.281827	0.282158		0.282183	10.615	0.975914	1.46998	1.50814	0.281884	0.282224
KK-2016-004-055	1335	0.282359	0.000149702	0.00499875			0.282229	11.4753	5.23957	1.36339	1.37879	0.281905	0.282249		0.282233	10.5838	5.23957	1.41091	1.44833	0.281935	0.282283		0.282225	12.2028	5.23957	1.32695	1.32536	0.281881	0.282221		0.282233	10.5789	5.23957	1.4094	1.44853	0.281935	0.282283
KK-2016-004-050	1329	0.282142	3.96465e-05	0.00196597			0.282091	6.44942	1.38763	1.5518	1.68665	0.281909	0.282253		0.282093	5.46731	1.38763	1.60588	1.77252	0.281939	0.282287		0.28209	7.251	1.38763	1.51032	1.62069	0.281885	0.282226		0.282093	5.46541	1.38763	1.60416	1.77216	0.281939	0.282287
KK-2016-004-098	1324	0.282191	5.72808e-05	0.00124762			0.282159	8.73566	2.00483	1.45589	1.54086	0.281913	0.282257		0.28216	7.73463	2.00483	1.50663	1.62318	0.281942	0.282291		0.282158	9.55268	2.00483	1.41698	1.47761	0.281889	0.282229		0.28216	7.73342	2.00483	1.50502	1.62293	0.281942	0.282291
KK-2016-004-063	1426	0.281956	2.42431e-05	0.000962027			0.28193	2.97845	0.848508	1.76011	1.97652	0.281846	0.282179		0.28193	1.88895	0.848508	1.82146	2.07648	0.281877	0.282216		0.281929	3.86773	0.848508	1.71307	1.89973	0.28182	0.28215		0.28193	1.88795	0.848508	1.81951	2.07585	0.281877	0.282216
KK-2016-004-065	1298	0.282263	4.17835e-05	0.00180809			0.282217	10.1965	1.46242	1.37889	1.42984	0.28193	0.282277		0.282219	9.23269	1.46242	1.42694	1.50671	0.281958	0.28231		0.282216	10.9831	1.46242	1.34203	1.37078	0.281906	0.28225		0.282219	9.23098	1.46242	1.42541	1.5066	0.281958	0.28231
KK-2016-004-082	1357	0.282286	4.50023e-05	0.0011539			0.282256	12.9422	1.57508	1.32336	1.30424	0.281891	0.282232		0.282257	11.9121	1.57508	1.36948	1.37966	0.281921	0.282267		0.282255	13.783	1.57508	1.28799	1.24627	0.281866	0.282204		0.282257	11.9109	1.57508	1.36801	1.37971	0.281921	0.282267
KK-2016-004-069	1400	0.282075	4.25739e-05	0.00223058			0.282014	5.3634	1.49009	1.65649	1.80892	0.281863	0.282199		0.282016	4.33615	1.49009	1.71422	1.89996	0.281894	0.282235		0.282012	6.20186	1.49009	1.61221	1.73898	0.281837	0.28217		0.282016	4.33388	1.49009	1.71238	1.89957	0.281894	0.282235
Irby Siltstone Sisters Beach, -40.90959, 145.54773
KK-2016-130-025	1127	0.281704	5.12883e-05	0.000730729			0.281688	-12.5521	1.79509	2.08402	2.69438	0.282042	0.282407		0.281688	-13.4125	1.79509	2.15665	2.81165	0.282067	0.282435		0.281687	-11.85	1.79509	2.02832	2.60438	0.282022	0.282383		0.281688	-13.4131	1.79509	2.15434	2.80988	0.282067	0.282435
KK-2016-130-020	1263	0.282222	3.12815e-05	0.000829465			0.282202	8.82771	1.09485	1.39847	1.4879	0.281953	0.282303		0.282202	7.86155	1.09485	1.44721	1.56776	0.281981	0.282336		0.282201	9.61623	1.09485	1.3611	1.42654	0.28193	0.282277		0.282202	7.86079	1.09485	1.44566	1.56748	0.281981	0.282336
KK-2016-130-021	1358	0.282294	3.64165e-05	0.00175148			0.282247	12.6598	1.27458	1.33464	1.32265	0.28189	0.282231		0.282249	11.6481	1.27458	1.38116	1.39748	0.28192	0.282266		0.282246	13.4855	1.27458	1.29897	1.26515	0.281866	0.282203		0.282249	11.6463	1.27458	1.37968	1.39755	0.28192	0.282266
KK-2016-130-033	1304	0.282203	3.84157e-05	0.00042907			0.282192	9.43859	1.34455	1.40951	1.48166	0.281926	0.282272		0.282192	8.4278	1.34455	1.45863	1.56313	0.281955	0.282306		0.282192	10.2636	1.34455	1.37184	1.41906	0.281902	0.282245		0.282192	8.42739	1.34455	1.45707	1.56288	0.281955	0.282306
KK-2016-130-048	1367	0.282111	3.54891e-05	0.00137828			0.282074	6.74171	1.24212	1.56963	1.69795	0.281884	0.282224		0.282076	5.71166	1.24212	1.62433	1.7863	0.281915	0.282259		0.282073	7.58244	1.24212	1.52768	1.63008	0.28186	0.282196		0.282076	5.71029	1.24212	1.62259	1.78594	0.281915	0.282259
KK-2016-130-053	1323	0.282143	6.82702e-05	0.00434861			0.28203	4.15201	2.38946	1.65782	1.82423	0.281913	0.282258		0.282034	3.24921	2.38946	1.7156	1.9098	0.281943	0.282292		0.282027	4.88885	2.38946	1.61351	1.75851	0.281889	0.28223		0.282034	3.24503	2.38946	1.71376	1.90944	0.281943	0.282292
KK-2016-130-067	1302	0.282199	3.41833e-05	0.000832171			0.282177	8.87547	1.19641	1.43022	1.51513	0.281927	0.282274		0.282178	7.87873	1.19641	1.48007	1.59688	0.281956	0.282307		0.282177	9.68897	1.19641	1.392	1.45233	0.281904	0.282247		0.282178	7.87794	1.19641	1.47848	1.59661	0.281956	0.282307
KK-2016-130-066	1388	0.282217	4.55929e-05	0.00217868			0.282158	10.1887	1.59575	1.45707	1.49998	0.281871	0.282208		0.28216	9.16828	1.59575	1.50785	1.58054	0.281901	0.282244		0.282156	11.0216	1.59575	1.41813	1.43808	0.281846	0.282179		0.28216	9.16608	1.59575	1.50624	1.58048	0.281901	0.282244
KK-2016-130-059	1373	0.282302	4.90938e-05	0.00211146			0.282245	12.9491	1.71828	1.33594	1.31618	0.28188	0.28222		0.282247	11.9376	1.71828	1.3825	1.3904	0.281911	0.282255		0.282244	13.7747	1.71828	1.30023	1.25914	0.281856	0.282191		0.282247	11.9354	1.71828	1.38102	1.39052	0.281911	0.282255
Jacob Quartzite
Reference: Mulder, J.A., Halpin, J.A., Daczko, N.R., 2015a. Mesoproterozoic Tasmania: witness to the East Antarctica-Laurentia connection within Nuna. Geology 43, 759–762.
							Blichert-Toft et al., 1997-176Lu decay constant (1.93x10-11)								Scherer et al., 2001 - 176Lu decay constant (1.865x10-11)								Bizzarro et al., 2003 - 176Lu decay constant (1.983x10-11)								Soderlund et al. 2004 - 176Lu decay constant (1.867x10-11)
Analysis No.	Age	176Hf/177Hf	1se	176Lu/177Hf	176Yb/177Hf		176Hf/177Hf	epsilon Hf	1 se	T(DM)	T(DM)	Hf Chur (t)	Hf DM (t)		176Hf/177Hf	epsilon Hf	1 se	T(DM)	T(DM)	Hf Chur (t)	Hf DM (t)		176Hf/177Hf	epsilon Hf	1 se	T(DM)	T(DM)	Hf Chur (t)	Hf DM (t)		176Hf/177Hf	epsilon Hf	1 se	T(DM)	T(DM)	Hf Chur (t)	Hf DM (t)
	(Ma)						initial			(Ga)	crustal				initial			(Ga)	crustal				initial			(Ga)	crustal				initial			(Ga)	crustal
2014-081-A130	1747	0.281796	1.7e-05	0.00075931	0.0322864		0.28177	4.84513	0.595	1.96378	2.10937	0.281634	0.281934		0.281771	3.49254	0.595	2.03223	2.22244	0.281672	0.281979		0.281769	5.94942	0.595	1.9113	2.02245	0.281602	0.281897		0.281771	3.49157	0.595	2.03005	2.222	0.281672	0.281979
2014-081-A133	1300	0.282272	4e-05	0.000595634	0.0257746		0.282257	11.6481	1.4	1.32337	1.34092	0.281928	0.282275		0.282257	10.6454	1.4	1.36949	1.41727	0.281957	0.282309		0.282256	12.4664	1.4	1.288	1.28226	0.281905	0.282248		0.282257	10.6448	1.4	1.36803	1.41718	0.281957	0.282309
2014-081-A135	1224	0.282151	2.1e-05	0.00145306	0.0625491		0.282116	4.89019	0.735	1.51873	1.70185	0.281978	0.282333		0.282117	3.97302	0.735	1.57166	1.78677	0.282005	0.282364		0.282115	5.6387	0.735	1.47814	1.63663	0.281956	0.282308		0.282117	3.97173	0.735	1.56998	1.78625	0.282005	0.282364
2014-081-A151	1673	0.282324	0.00013	0.00237845	0.14146		0.282246	20.0025	4.55	1.31513	1.10509	0.281683	0.281991		0.282249	18.7717	4.55	1.36096	1.17889	0.28172	0.282034		0.282244	21.0073	4.55	1.27998	1.04831	0.281652	0.281956		0.282249	18.7688	4.55	1.35951	1.17961	0.28172	0.282034
2014-081-A165	1349	0.282264	2.6e-05	0.00117309	0.0468082		0.282233	11.9474	0.91	1.35448	1.36017	0.281896	0.282238		0.282234	10.9242	0.91	1.40169	1.43722	0.281926	0.282273		0.282232	12.7825	0.91	1.31828	1.30095	0.281872	0.28221		0.282234	10.923	0.91	1.40019	1.4372	0.281926	0.282273
2014-081-A170	1456	0.282146	3.3e-05	0.0012588	0.0530094		0.28211	10.0879	1.155	1.51768	1.55886	0.281826	0.282157		0.282111	8.98422	1.155	1.57057	1.64502	0.281858	0.282194		0.282109	10.9888	1.155	1.47712	1.49265	0.281799	0.282126		0.282111	8.98288	1.155	1.56889	1.6449	0.281858	0.282194
2014-081-A184	1438	0.282077	2.2e-05	0.000728459	0.0302412		0.282056	7.76396	0.77	1.58874	1.68947	0.281838	0.28217		0.282057	6.65652	0.77	1.64411	1.78068	0.28187	0.282207		0.282056	8.66791	0.77	1.54627	1.61937	0.281812	0.28214		0.282057	6.65576	0.77	1.64235	1.78036	0.28187	0.282207
2014-081-A185	1651	0.281961	2.7e-05	0.000792819	0.0315955		0.281935	8.45803	0.945	1.74617	1.81101	0.281697	0.282008		0.281936	7.18323	0.945	1.80703	1.91163	0.281734	0.28205		0.281935	9.49875	0.945	1.6995	1.73366	0.281667	0.281973		0.281936	7.18227	0.945	1.80509	1.91142	0.281734	0.28205
2014-081-A186	1452	0.282221	2.3e-05	0.000864477	0.0327369		0.282196	13.0567	0.805	1.4013	1.37054	0.281828	0.28216		0.282197	11.9422	0.805	1.45013	1.45122	0.281861	0.282197		0.282196	13.9664	0.805	1.36384	1.30854	0.281802	0.282129		0.282197	11.9413	0.805	1.44858	1.45128	0.281861	0.282197
2014-081-A189	1443	0.282264	2.6e-05	0.00136278	0.051147		0.282226	13.8779	0.91	1.36133	1.31224	0.281834	0.282167		0.282227	12.7874	0.91	1.40878	1.38964	0.281866	0.282204		0.282224	14.7679	0.91	1.32495	1.25274	0.281808	0.282136		0.282227	12.786	0.91	1.40727	1.38979	0.281866	0.282204
2014-081-A197	1331	0.282383	2.2e-05	0.00135708	0.0590393		0.282348	15.5933	0.77	1.19873	1.11822	0.281908	0.282252		0.282349	14.5895	0.77	1.24051	1.18638	0.281938	0.282286		0.282347	16.4125	0.77	1.1667	1.06584	0.281884	0.282224		0.282349	14.5882	0.77	1.23918	1.18662	0.281938	0.282286
2014-081-A214	1442	0.282112	1.4e-05	0.000999238	0.0416125		0.282084	8.82621	0.49	1.55303	1.62655	0.281835	0.282167		0.282085	7.72472	0.49	1.60716	1.71518	0.281867	0.282204		0.282083	9.72529	0.49	1.51152	1.55844	0.281809	0.282137		0.282085	7.72367	0.49	1.60543	1.71496	0.281867	0.282204
2014-081-A224	1444	0.282135	2.1e-05	0.00108514	0.0478499		0.282104	9.60154	0.735	1.52555	1.57986	0.281834	0.282166		0.282105	8.50133	0.735	1.57872	1.6668	0.281866	0.282203		0.282103	10.4996	0.735	1.48478	1.51305	0.281808	0.282136		0.282105	8.50019	0.735	1.57703	1.66664	0.281866	0.282203
2014-081-A231	1267	0.282051	1.5e-05	0.000378088	0.016904		0.282042	3.24493	0.525	1.60868	1.83687	0.28195	0.2823		0.282042	2.26268	0.525	1.66474	1.92938	0.281978	0.282333		0.282041	4.04659	0.525	1.56568	1.76582	0.281927	0.282274		0.282042	2.26234	0.525	1.66296	1.92869	0.281978	0.282333
2014-081-A237	1353	0.282367	2.4e-05	0.00115883	0.0471247		0.282336	15.7048	0.84	1.21418	1.12825	0.281894	0.282235		0.282337	14.6776	0.84	1.25649	1.19769	0.281924	0.28227		0.282335	16.5432	0.84	1.18172	1.07487	0.281869	0.282207		0.282337	14.6765	0.84	1.25515	1.19793	0.281924	0.28227
2014-081-A245	1439	0.282058	1.6e-05	0.000693393	0.0294689		0.282038	7.14774	0.56	1.6126	1.7285	0.281837	0.28217		0.282039	6.03837	0.56	1.6688	1.82111	0.281869	0.282206		0.282038	8.05325	0.56	1.5695	1.65733	0.281811	0.282139		0.282039	6.03764	0.56	1.66701	1.82075	0.281869	0.282206

## Sheet: Unkar Group
Unkar Group, Arizona (this study)
Multi-collector ICPMS Data - Arizona Laserchron Centre
Methods follow:
Gehrels, G.E., Valencia, V.A., Ruiz, J., 2008. Enhanced precision, accuracy, efficiency, and spatial resolution of U-Pb ages by laser ablation-multicollector-inductively coupled plasma mass spectrometry. In: Geochem. Geophys. Geosyst. 9.
Gehrels, G., Pecha, M., 2014. Detrital zircon U-Pb geo-chronology and Hf isotope geochemistry of Paleozoic and Triassic passive margin strata of western North America. Geosphere 10 (1), 49–65.
U-Pb data from: Mulder, J. A., Karlstrom, K. E. Fletcher, K., Heizler, M. T., Timmons, J. M., Crossey, L. J., Gehrels, G. E., and Pecha, M., 2017, The syn-orogenic sedimentary record of the Grenville Orogeny in southwest Laurentia. Precambrian Research, v. 294, 33–52, doi:10.1016/j.precamres.2017.03.006
							Blichert-Toft et al., 1997-176Lu decay constant (1.93x10-11)								*Scherer et al., 2001 - 176Lu decay constant (1.865x10-11)								Bizzarro et al., 2003 - 176Lu decay constant (1.983x10-11)								Soderlund et al. 2004 - 176Lu decay constant (1.867x10-11)
Analysis No.	Age	176Hf/177Hf	1se	176Lu/177Hf			176Hf/177Hf	epsilon Hf	1 se	T(DM)	T(DM)	Hf Chur (t)	Hf DM (t)		176Hf/177Hf	epsilon Hf	1 se	T(DM)	T(DM)	Hf Chur (t)	Hf DM (t)		176Hf/177Hf	epsilon Hf	1 se	T(DM)	T(DM)	Hf Chur (t)	Hf DM (t)		176Hf/177Hf	epsilon Hf	1 se	T(DM)	T(DM)	Hf Chur (t)	Hf DM (t)
Bass Formation	(Ma)						initial			(Ga)	crustal				initial			(Ga)	crustal				initial			(Ga)	crustal				initial			(Ga)	crustal
JM16-77-1-49	1223.1	0.282108	5.17899e-05	0.00137112			0.282075	3.40039	1.81265	1.57437	1.79323	0.281979	0.282334		0.282076	2.48169	1.81265	1.62924	1.88135	0.282006	0.282365		0.282074	4.15015	1.81265	1.53229	1.72557	0.281957	0.282308		0.282076	2.48047	1.81265	1.62749	1.88072	0.282006	0.282365
JM16-77-1-68	1234.5	0.28225	4.10444e-05	0.00111338			0.282223	8.91186	1.43655	1.37181	1.46059	0.281971	0.282325		0.282224	7.97634	1.43655	1.41962	1.5383	0.281999	0.282357		0.282222	9.67537	1.43655	1.33514	1.40089	0.281949	0.282299		0.282224	7.97534	1.43655	1.4181	1.53804	0.281999	0.282357
JM16-77-1-98	1227.9	0.282182	4.02748e-05	0.000687453			0.282166	6.73368	1.40962	1.44671	1.5907	0.281976	0.28233		0.282166	5.79116	1.40962	1.49713	1.6734	0.282003	0.282361		0.282165	7.50289	1.40962	1.40804	1.52717	0.281954	0.282305		0.282166	5.79055	1.40962	1.49552	1.67296	0.282003	0.282361
JM16-77-1-109	1234.8	0.28218	4.69401e-05	0.000643861			0.282164	6.84211	1.6429	1.4483	1.58932	0.281971	0.282325		0.282165	5.89287	1.6429	1.49878	1.67223	0.281999	0.282356		0.282164	7.6168	1.6429	1.40959	1.52564	0.281949	0.282299		0.282165	5.89229	1.6429	1.49717	1.6718	0.281999	0.282356
JM16-77-1-4	1235.2	0.282188	5.03462e-05	0.000800633			0.282169	7.01199	1.76212	1.44312	1.5791	0.281971	0.282325		0.282169	6.06699	1.76212	1.49341	1.66138	0.281998	0.282356		0.282168	7.78322	1.76212	1.40455	1.51589	0.281949	0.282299		0.282169	6.06627	1.76212	1.49181	1.66097	0.281998	0.282356
JM16-77-1-60	1249.4	0.282147	4.85703e-05	0.00126759			0.282116	5.48266	1.69996	1.51636	1.68487	0.281962	0.282314		0.282117	4.54043	1.69996	1.56921	1.77017	0.281989	0.282346		0.282115	6.25164	1.69996	1.47584	1.61936	0.281939	0.282288		0.282117	4.53928	1.69996	1.56753	1.76968	0.281989	0.282346
JM16-77-1-53	1266.7	0.282299	3.24744e-05	0.000808901			0.282279	11.6479	1.1366	1.2948	1.31516	0.28195	0.282301		0.282279	10.6779	1.1366	1.33992	1.38938	0.281978	0.282333		0.282278	12.4395	1.1366	1.26019	1.25813	0.281927	0.282274		0.282279	10.6772	1.1366	1.33849	1.38929	0.281978	0.282333
JM16-77-1-18	1445.4	0.282088	4.14844e-05	0.00100906			0.28206	8.04823	1.45195	1.58546	1.67753	0.281833	0.282165		0.282061	6.9445	1.45195	1.64071	1.76793	0.281865	0.282202		0.282059	8.94916	1.45195	1.54308	1.60807	0.281807	0.282134		0.282061	6.94343	1.45195	1.63896	1.76765	0.281865	0.282202
JM16-77-1-46	1450.8	0.282139	4.6442e-05	0.00106015			0.282109	9.92933	1.62547	1.5189	1.56471	0.281829	0.282161		0.28211	8.82288	1.62547	1.57184	1.65138	0.281861	0.282198		0.282108	10.8325	1.62547	1.4783	1.49811	0.281803	0.28213		0.28211	8.82176	1.62547	1.57015	1.65123	0.281861	0.282198
JM16-77-1-12	1458.2	0.282135	4.25281e-05	0.00100717			0.282107	10.012	1.48848	1.52204	1.56529	0.281824	0.282155		0.282108	8.89787	1.48848	1.57508	1.65228	0.281857	0.282192		0.282106	10.9214	1.48848	1.48136	1.49844	0.281798	0.282124		0.282107	8.89679	1.48848	1.5734	1.65214	0.281857	0.282192
Bass Formation
JM16-77-2-26	1219.6	0.282181	3.17844e-05	0.0012491			0.282151	6.02793	1.11245	1.46988	1.628	0.281981	0.282336		0.282152	5.10818	1.11245	1.52111	1.71072	0.282008	0.282368		0.28215	6.77856	1.11245	1.43059	1.56448	0.281959	0.282311		0.282152	5.10707	1.11245	1.51948	1.71026	0.282008	0.282368
JM16-77-2-62	1220.2	0.282171	4.19495e-05	0.001621			0.282132	5.36205	1.46823	1.49862	1.6697	0.281981	0.282336		0.282133	4.45259	1.46823	1.55085	1.75314	0.282008	0.282367		0.282131	6.10427	1.46823	1.45857	1.60562	0.281959	0.282311		0.282133	4.45116	1.46823	1.54919	1.75266	0.282008	0.282367
JM16-77-2-56	1224.1	0.282224	3.54117e-05	0.00131701			0.282193	7.60374	1.23941	1.41381	1.53378	0.281978	0.282333		0.282194	6.68231	1.23941	1.46309	1.61332	0.282005	0.282364		0.282192	8.35573	1.23941	1.37602	1.47269	0.281956	0.282307		0.282194	6.68114	1.23941	1.46152	1.61298	0.282005	0.282364
JM16-77-2-45	1233.8	0.282257	2.91252e-05	0.000701368			0.28224	9.49903	1.01938	1.34754	1.42353	0.281972	0.282326		0.28224	8.552	1.01938	1.39451	1.50076	0.281999	0.282357		0.282239	10.2719	1.01938	1.31153	1.36421	0.28195	0.2823		0.28224	8.55137	1.01938	1.39301	1.50051	0.281999	0.282357
JM16-77-2-22	1234	0.282158	4.03239e-05	0.00191348			0.282112	4.96616	1.41134	1.52802	1.7049	0.281972	0.282325		0.282113	4.05471	1.41134	1.58127	1.7893	0.281999	0.282357		0.282111	5.71002	1.41134	1.48718	1.64008	0.28195	0.2823		0.282113	4.05299	1.41134	1.57958	1.78881	0.281999	0.282357
JM16-77-2-75	1235.3	0.282224	3.50912e-05	0.00140954			0.28219	7.77405	1.22819	1.41734	1.53189	0.281971	0.282324		0.282191	6.84665	1.22819	1.46674	1.61146	0.281998	0.282356		0.282189	8.53092	1.22819	1.37946	1.47077	0.281949	0.282299		0.282191	6.84538	1.22819	1.46517	1.61113	0.281998	0.282356
JM16-77-2-40	1242.6	0.282148	3.53105e-05	0.000638206			0.282132	5.88801	1.23587	1.49085	1.6545	0.281966	0.282319		0.282133	4.93255	1.23587	1.54281	1.7398	0.281994	0.282351		0.282132	6.66779	1.23587	1.45101	1.58898	0.281944	0.282293		0.282133	4.93197	1.23587	1.54116	1.7393	0.281994	0.282351
JM16-77-2-31	1243	0.28213	3.09505e-05	0.000740212			0.282112	5.1747	1.08327	1.51875	1.69897	0.281966	0.282319		0.282112	4.22198	1.08327	1.57168	1.78558	0.281993	0.28235		0.282111	5.95224	1.08327	1.47815	1.63245	0.281943	0.282293		0.282112	4.22132	1.08327	1.56999	1.78504	0.281993	0.28235
JM16-77-2-19	1250	0.282181	3.62936e-05	0.000822718			0.282161	7.08566	1.27028	1.45316	1.586	0.281961	0.282313		0.282162	6.12968	1.27028	1.50381	1.66884	0.281989	0.282345		0.282161	7.86586	1.27028	1.41432	1.52236	0.281939	0.282287		0.282162	6.12893	1.27028	1.5022	1.66844	0.281989	0.282345
JM16-77-2-36	1250.7	0.282111	3.89605e-05	0.000737261			0.282093	4.69313	1.36362	1.54347	1.73474	0.281961	0.282313		0.282094	3.73431	1.36362	1.59726	1.82273	0.281988	0.282345		0.282093	5.47565	1.36362	1.50221	1.66715	0.281938	0.282287		0.282094	3.73364	1.36362	1.59555	1.82216	0.281988	0.282345
JM16-77-2-100	1443.7	0.282029	3.33455e-05	0.00109228			0.281999	5.8415	1.16709	1.66802	1.81313	0.281834	0.282166		0.282	4.7422	1.16709	1.72615	1.90781	0.281866	0.282203		0.281998	6.7388	1.16709	1.62343	1.74039	0.281808	0.282136		0.282	4.74105	1.16709	1.7243	1.90739	0.281866	0.282203
JM16-77-2-92	1445.7	0.282145	3.70343e-05	0.000824231			0.282122	10.2593	1.2962	1.50162	1.54022	0.281833	0.282164		0.282123	9.14878	1.2962	1.55396	1.62646	0.281865	0.282202		0.282121	11.1658	1.2962	1.46149	1.47394	0.281806	0.282134		0.282123	9.14791	1.2962	1.55229	1.62632	0.281865	0.282202
JM16-77-2-47	1447.4	0.282059	2.96135e-05	0.0011043			0.282028	6.95726	1.03647	1.62894	1.74682	0.281831	0.282163		0.282029	5.85534	1.03647	1.68572	1.83935	0.281864	0.2822		0.282027	7.8567	1.03647	1.58541	1.67571	0.281805	0.282133		0.282029	5.85418	1.03647	1.68391	1.83901	0.281864	0.2822
JM16-77-2-73	1453.6	0.282113	3.43295e-05	0.00113638			0.282081	9.0022	1.20153	1.55671	1.62458	0.281827	0.282158		0.282082	7.89628	1.20153	1.61097	1.71313	0.28186	0.282196		0.28208	9.9049	1.20153	1.51511	1.55652	0.281801	0.282128		0.282082	7.89508	1.20153	1.60924	1.71293	0.28186	0.282196
JM16-77-2-58	1453.6	0.282085	3.51148e-05	0.00134825			0.282047	7.7883	1.22902	1.60371	1.70002	0.281827	0.282158		0.282048	6.68983	1.22902	1.6596	1.79062	0.28186	0.282196		0.282046	8.68494	1.22902	1.56084	1.63041	0.281801	0.282128		0.282048	6.6884	1.22902	1.65782	1.79035	0.28186	0.282196
Hakatai Shale
K16-77-1-89	1206.5	0.282124	4.46483e-05	0.00167345			0.282085	3.37324	1.56269	1.56414	1.78204	0.28199	0.282346		0.282086	2.47593	1.56269	1.61865	1.86883	0.282016	0.282377		0.282084	4.10553	1.56269	1.52233	1.71538	0.281968	0.282321		0.282086	2.47447	1.56269	1.61692	1.86822	0.282016	0.282377
K16-77-1-92	1220.8	0.282249	4.43642e-05	0.000778855			0.28223	8.84955	1.55275	1.36116	1.45385	0.28198	0.282335		0.282231	7.91505	1.55275	1.4086	1.53162	0.282007	0.282367		0.282229	9.61221	1.55275	1.32478	1.3941	0.281958	0.28231		0.282231	7.91436	1.55275	1.40709	1.53133	0.282007	0.282367
K16-77-1-29	1223	0.282136	4.68618e-05	0.00112264			0.282109	4.60333	1.64016	1.52619	1.71882	0.281979	0.282334		0.28211	3.67743	1.64016	1.57938	1.80489	0.282006	0.282365		0.282108	5.35897	1.64016	1.4854	1.65271	0.281957	0.282308		0.28211	3.67643	1.64016	1.57769	1.80433	0.282006	0.282365
K16-77-1-93	1227.9	0.282018	5.11143e-05	0.00147998			0.281983	0.244381	1.789	1.7005	1.99149	0.281976	0.28233		0.281984	-0.674557	1.789	1.75976	2.08616	0.282003	0.282361		0.281982	0.994343	1.789	1.65505	1.91879	0.281954	0.282305		0.281984	-0.675875	1.789	1.75788	2.08532	0.282003	0.282361
K16-77-1-87	1232.3	0.282095	5.49092e-05	0.000872763			0.282074	3.57363	1.92182	1.57105	1.78967	0.281973	0.282327		0.282074	2.63334	1.92182	1.62581	1.8788	0.282	0.282358		0.282073	4.34102	1.92182	1.52906	1.72121	0.281951	0.282301		0.282074	2.63256	1.92182	1.62406	1.87816	0.282	0.282358
K16-77-1-20	1237.3	0.282223	4.65755e-05	0.00101251			0.282199	8.13441	1.63014	1.40342	1.51106	0.28197	0.282323		0.2822	7.19384	1.63014	1.45234	1.59072	0.281997	0.282355		0.282198	8.90203	1.63014	1.36591	1.44987	0.281947	0.282297		0.2822	7.19293	1.63014	1.45078	1.5904	0.281997	0.282355
K16-77-1-48	1248.2	0.2821	4.38265e-05	0.000949753			0.282077	4.04404	1.53393	1.56755	1.77293	0.281962	0.282315		0.282077	3.09351	1.53393	1.62219	1.86175	0.28199	0.282347		0.282076	4.81979	1.53393	1.52566	1.70472	0.28194	0.282289		0.282077	3.09265	1.53393	1.62045	1.86114	0.28199	0.282347
K16-77-1-35	1259.2	0.282112	5.06052e-05	0.001184			0.282083	4.51277	1.77118	1.56111	1.75248	0.281955	0.282306		0.282084	3.56056	1.77118	1.61552	1.84043	0.281983	0.282339		0.282082	5.2899	1.77118	1.51939	1.68493	0.281933	0.28228		0.282083	3.55948	1.77118	1.61379	1.83988	0.281983	0.282339
K16-77-1-71	1263	0.282291	3.65581e-05	0.000577656			0.282277	11.5068	1.27953	1.29675	1.32109	0.281953	0.282303		0.282278	10.5329	1.27953	1.34194	1.39586	0.281981	0.282336		0.282277	12.3017	1.27953	1.26209	1.26364	0.28193	0.282277		0.282278	10.5324	1.27953	1.3405	1.39575	0.281981	0.282336
K16-77-1-10	1272.8	0.282168	4.85081e-05	0.000721551			0.28215	7.21772	1.69778	1.46723	1.59547	0.281946	0.282296		0.28215	6.24078	1.69778	1.51837	1.67939	0.281974	0.282329		0.282149	8.01504	1.69778	1.42802	1.53101	0.281923	0.282269		0.28215	6.24011	1.69778	1.51674	1.67899	0.281974	0.282329
K16-77-1-9	1295.6	0.282278	4.04852e-05	0.00141885			0.282242	11.0256	1.41698	1.34407	1.37633	0.281931	0.282279		0.282243	10.0516	1.41698	1.39091	1.45212	0.28196	0.282312		0.282241	11.8205	1.41698	1.30815	1.3181	0.281908	0.282252		0.282243	10.0503	1.41698	1.38942	1.45204	0.28196	0.282312
K16-77-1-67	1307.2	0.282157	4.57295e-05	0.00266849			0.282088	5.84007	1.60053	1.56178	1.70753	0.281924	0.28227		0.282091	4.89627	1.60053	1.61622	1.7922	0.281953	0.282303		0.282086	6.61035	1.60053	1.52004	1.64249	0.2819	0.282243		0.282091	4.89374	1.60053	1.61449	1.79184	0.281953	0.282303
K16-77-1-82	1320.1	0.282279	4.35029e-05	0.00251321			0.282214	10.5868	1.5226	1.3839	1.42264	0.281915	0.28226		0.282216	9.62812	1.5226	1.43213	1.49837	0.281944	0.282294		0.282212	11.3693	1.5226	1.34691	1.36445	0.281891	0.282233		0.282216	9.6257	1.5226	1.43059	1.49833	0.281944	0.282294
K16-77-1-91	1327.2	0.282268	5.33533e-05	0.00148696			0.282229	11.3062	1.86737	1.3605	1.3833	0.281911	0.282255		0.282231	10.3099	1.86737	1.40792	1.45995	0.28194	0.282289		0.282228	12.1193	1.86737	1.32414	1.3244	0.281887	0.282227		0.282231	10.3084	1.86737	1.40641	1.4599	0.28194	0.282289
K16-77-1-81	1329.1	0.28221	4.10763e-05	0.00170771			0.282166	9.10086	1.43767	1.44778	1.5221	0.281909	0.282253		0.282167	8.11028	1.43767	1.49823	1.60299	0.281939	0.282287		0.282165	9.90935	1.43767	1.40908	1.45995	0.281885	0.282225		0.282167	8.10862	1.43767	1.49663	1.6028	0.281939	0.282287
K16-77-1-103	1341.9	0.282231	3.87329e-05	0.00143466			0.282193	10.3634	1.35565	1.40936	1.45343	0.281901	0.282244		0.282194	9.35421	1.35565	1.45848	1.53289	0.281931	0.282278		0.282192	11.1871	1.35565	1.37169	1.39238	0.281877	0.282215		0.282194	9.35281	1.35565	1.45692	1.53277	0.281931	0.282278
K16-77-1-57	1361.1	0.282293	5.97763e-05	0.00146252			0.282254	12.9825	2.09217	1.32506	1.30489	0.281888	0.282229		0.282256	11.959	2.09217	1.37124	1.3798	0.281918	0.282264		0.282253	13.8178	2.09217	1.28964	1.24732	0.281864	0.2822		0.282256	11.9576	2.09217	1.36977	1.37988	0.281918	0.282264
K16-77-1-94	1369.6	0.282114	4.79401e-05	0.00161483			0.282071	6.67153	1.67791	1.57586	1.70432	0.281883	0.282222		0.282072	5.64714	1.67791	1.63078	1.79245	0.281913	0.282258		0.28207	7.50764	1.67791	1.53374	1.63661	0.281858	0.282194		0.282072	5.64553	1.67791	1.62903	1.7921	0.281913	0.282258
K16-77-1-56	1373.7	0.28222	3.67607e-05	0.00137908			0.282183	10.7503	1.28663	1.42174	1.45393	0.28188	0.282219		0.282184	9.71466	1.28663	1.47129	1.5343	0.28191	0.282255		0.282182	11.5956	1.28663	1.38374	1.39217	0.281855	0.282191		0.282184	9.71328	1.28663	1.46971	1.53421	0.28191	0.282255
K16-77-1-14	1376.3	0.282021	5.77014e-05	0.00267033			0.281949	2.49792	2.01955	1.75284	1.96769	0.281878	0.282217		0.281951	1.5032	2.01955	1.81393	2.06258	0.281909	0.282253		0.281947	3.30981	2.01955	1.70599	1.89481	0.281853	0.282189		0.281951	1.50052	2.01955	1.81198	2.06201	0.281909	0.282253
K16-77-1-62	1384.9	0.282232	4.9902e-05	0.00112415			0.282202	11.6787	1.74657	1.39565	1.40471	0.281873	0.282211		0.282203	10.6259	1.74657	1.4443	1.48425	0.281903	0.282246		0.282201	12.538	1.74657	1.35835	1.34358	0.281848	0.282182		0.282203	10.6248	1.74657	1.44275	1.48421	0.281903	0.282246
K16-77-1-44	1448.7	0.282201	4.83372e-05	0.00154174			0.282157	11.5879	1.6918	1.45413	1.45971	0.281831	0.282162		0.282159	10.4994	1.6918	1.50481	1.54177	0.281863	0.282199		0.282156	12.4763	1.6918	1.41527	1.39665	0.281804	0.282132		0.282159	10.4978	1.6918	1.5032	1.54177	0.281863	0.282199
K16-77-1-18	1453.7	0.282208	3.83013e-05	0.00242198			0.282139	11.0513	1.34055	1.47972	1.49705	0.281827	0.282158		0.282141	9.98941	1.34055	1.53129	1.57851	0.28186	0.282196		0.282137	11.9181	1.34055	1.44017	1.43444	0.281801	0.282128		0.282141	9.98684	1.34055	1.52965	1.57854	0.28186	0.282196
Hakatai Shale
K16-77-3-107	1740.7	0.281958	4.40939e-05	0.000378009			0.281945	10.9015	1.54329	1.73188	1.7281	0.281638	0.281939		0.281945	9.53732	1.54329	1.79224	1.82947	0.281677	0.281984		0.281944	12.0153	1.54329	1.68559	1.65014	0.281606	0.281902		0.281945	9.53684	1.54329	1.79032	1.82941	0.281677	0.281984
K16-77-3-94	1749.7	0.281961	3.91335e-05	0.0006407			0.281939	10.9239	1.36967	1.73875	1.73364	0.281632	0.281932		0.28194	9.56334	1.36967	1.79935	1.83474	0.281671	0.281977		0.281939	12.0347	1.36967	1.69228	1.6559	0.2816	0.281895		0.28194	9.56252	1.36967	1.79743	1.83471	0.281671	0.281977
K16-77-3-66	1751.1	0.281681	3.76628e-05	0.00058451			0.281661	1.07182	1.3182	2.1063	2.34568	0.281631	0.281931		0.281662	-0.290834	1.3182	2.17971	2.4671	0.28167	0.281976		0.28166	2.18434	1.3182	2.05	2.25235	0.281599	0.281894		0.281662	-0.291585	1.3182	2.17737	2.46638	0.28167	0.281976
K16-77-3-20	1765.5	0.282008	4.09544e-05	0.000603359			0.281987	12.9791	1.4334	1.67565	1.61747	0.281621	0.28192		0.281987	11.6039	1.4334	1.73405	1.71528	0.281661	0.281966		0.281986	14.1018	1.4334	1.63086	1.54224	0.281589	0.281883		0.281987	11.6032	1.4334	1.73219	1.71539	0.281661	0.281966
K16-77-3-3	1770.6	0.28178	4.82605e-05	0.000851357			0.28175	4.69894	1.68912	1.99004	2.13665	0.281618	0.281916		0.281751	3.3313	1.68912	2.0594	2.251	0.281657	0.281962		0.281749	5.81553	1.68912	1.93685	2.04875	0.281586	0.281879		0.281751	3.3302	1.68912	2.05719	2.25055	0.281657	0.281962
K16-77-3-23	1771.6	0.281932	4.66213e-05	0.0005635			0.281912	10.4646	1.63174	1.77481	1.77919	0.281617	0.281915		0.281913	9.0832	1.63174	1.83667	1.88259	0.281657	0.281961		0.281911	11.5925	1.63174	1.72737	1.69967	0.281585	0.281878		0.281913	9.08247	1.63174	1.8347	1.88251	0.281657	0.281961
Shinumo Sandstone
KK-K1275L-83	1321.9	0.282334	0.00015725	0.0140332			0.281972	2.048	5.50375	1.91114	1.95329	0.281914	0.282259		0.281984	1.44883	5.50375	1.97775	2.02387	0.281943	0.282293		0.281962	2.53703	5.50375	1.86006	1.8991	0.28189	0.282231		0.281984	1.43535	5.50375	1.97563	2.02398	0.281943	0.282293
KK-K1275L-12	1236.7	0.282203	3.49961e-05	0.000857958			0.282183	7.53821	1.22486	1.4248	1.54761	0.28197	0.282323		0.282183	6.59366	1.22486	1.47446	1.62877	0.281997	0.282355		0.282182	8.30909	1.22486	1.38672	1.48527	0.281948	0.282298		0.282183	6.59289	1.22486	1.47288	1.6284	0.281997	0.282355
KK-K1275L-15	1451.2	0.282026	3.33834e-05	0.00132537			0.281989	5.67044	1.16842	1.68237	1.82954	0.281829	0.28216		0.28199	4.57329	1.16842	1.741	1.92443	0.281861	0.282198		0.281988	6.56599	1.16842	1.6374	1.75662	0.281803	0.28213		0.28199	4.57189	1.16842	1.73914	1.92402	0.281861	0.282198
KK-K1275L-82	1185.2	0.282094	3.72186e-05	0.000469587			0.282084	2.82983	1.30265	1.55488	1.79906	0.282004	0.282363		0.282084	1.91518	1.30265	1.60907	1.88809	0.28203	0.282393		0.282083	3.57626	1.30265	1.51332	1.73069	0.281982	0.282338		0.282084	1.91478	1.30265	1.60735	1.88736	0.28203	0.282393
KK-K1275L-71	1452.8	0.281993	2.7139e-05	0.000744195			0.281971	5.09089	0.949866	1.70194	1.86667	0.281828	0.282159		0.281972	3.97254	0.949866	1.76125	1.96412	0.28186	0.282196		0.281971	6.00374	0.949866	1.65645	1.79179	0.281802	0.282129		0.281972	3.97175	0.949866	1.75937	1.96362	0.28186	0.282196
KK-K1275L-72	1184.5	0.282095	4.16846e-05	0.0007319			0.282078	2.59948	1.45896	1.56552	1.81273	0.282004	0.282363		0.282078	1.69274	1.45896	1.62008	1.90173	0.28203	0.282393		0.282077	3.33947	1.45896	1.52368	1.74438	0.281983	0.282338		0.282078	1.69211	1.45896	1.61834	1.901	0.28203	0.282393
KK-K1275L-73	1444.2	0.282048	5.00113e-05	0.00273667			0.28197	4.84831	1.75039	1.71812	1.87502	0.281834	0.282166		0.281973	3.80502	1.75039	1.778	1.96817	0.281866	0.282203		0.281968	5.6999	1.75039	1.6722	1.80346	0.281807	0.282135		0.281973	3.80214	1.75039	1.77609	1.9678	0.281866	0.282203
KK-K1275L-75	1193.2	0.282034	4.4864e-05	0.000888177			0.282013	0.518715	1.57024	1.6531	1.94768	0.281999	0.282356		0.282014	-0.39027	1.57024	1.71072	2.04114	0.282025	0.282387		0.282013	1.26053	1.57024	1.60892	1.87592	0.281977	0.282332		0.282014	-0.391038	1.57024	1.70889	2.04028	0.282025	0.282387
KK-K1275L-8	1308	0.282021	5.28607e-05	0.00138792			0.281986	2.22234	1.85012	1.69206	1.93176	0.281923	0.282269		0.281987	1.23874	1.85012	1.75103	2.02648	0.281952	0.282303		0.281985	3.02512	1.85012	1.64684	1.85901	0.2819	0.282242		0.281987	1.23742	1.85012	1.74916	2.0258	0.281952	0.282303
KK-K1275L-5	1213.4	0.282214	4.10926e-05	0.000768862			0.282195	7.44768	1.43824	1.40776	1.53518	0.281985	0.282341		0.282196	6.51883	1.43824	1.45682	1.61551	0.282012	0.282372		0.282195	8.20571	1.43824	1.37013	1.47347	0.281963	0.282316		0.282196	6.51816	1.43824	1.45526	1.61512	0.282012	0.282372
KK-K1275L-2	1214	0.282195	3.21841e-05	0.00145766			0.282161	6.2331	1.12644	1.45861	1.61095	0.281985	0.282341		0.282162	5.32362	1.12644	1.50945	1.69258	0.282012	0.282372		0.28216	6.97533	1.12644	1.41963	1.54826	0.281963	0.282315		0.282162	5.32234	1.12644	1.50783	1.69215	0.282012	0.282372
KK-K1275L-6	1211.1	0.282293	2.65022e-05	0.00244984			0.282236	8.82025	0.927576	1.36055	1.44815	0.281987	0.282343		0.282238	7.9411	0.927576	1.40797	1.52243	0.282014	0.282374		0.282234	9.53773	0.927576	1.32419	1.3911	0.281965	0.282318		0.282237	7.93894	0.927576	1.40647	1.52223	0.282014	0.282374
KK-K1275L-67	1184.3	0.28219	3.8179e-05	0.000467791			0.282179	6.19637	1.33626	1.42809	1.5902	0.282004	0.282363		0.28218	5.28207	1.33626	1.47786	1.6722	0.282031	0.282393		0.282179	6.94252	1.33626	1.38992	1.52723	0.281983	0.282339		0.28218	5.28167	1.33626	1.47628	1.67171	0.282031	0.282393
KK-K1275L-76	1227.8	0.282202	4.90094e-05	0.0018778			0.282157	6.41233	1.71533	1.46623	1.61054	0.281976	0.28233		0.282158	5.5044	1.71533	1.51734	1.6917	0.282003	0.282362		0.282155	7.15331	1.71533	1.42705	1.54821	0.281954	0.282305		0.282158	5.50272	1.71533	1.51571	1.69131	0.282003	0.282362
KK-K1275L-77	1220	0.282235	2.95577e-05	0.000656029			0.28222	8.46434	1.03452	1.37454	1.47717	0.281981	0.282336		0.28222	7.52697	1.03452	1.42245	1.55593	0.282008	0.282367		0.282219	9.22934	1.03452	1.3378	1.41666	0.281959	0.282311		0.28222	7.52638	1.03452	1.42092	1.5556	0.282008	0.282367
KK-K1275L-49	1214.2	0.282209	3.60959e-05	0.000732344			0.282191	7.32886	1.26336	1.41274	1.54317	0.281985	0.282341		0.282192	6.39835	1.26336	1.46198	1.62386	0.282012	0.282372		0.282191	8.08825	1.26336	1.37498	1.48119	0.281963	0.282315		0.282192	6.39771	1.26336	1.46041	1.62346	0.282012	0.282372
KK-K1275L-51	1193.4	0.282263	4.14198e-05	0.000669086			0.282247	8.82462	1.44969	1.33811	1.43417	0.281998	0.282356		0.282248	7.90854	1.44969	1.38475	1.5108	0.282025	0.282387		0.282247	9.57224	1.44969	1.30235	1.3753	0.281977	0.282331		0.282248	7.90796	1.44969	1.38327	1.51049	0.282025	0.282387
KK-K1275L-88	1219	0.282218	3.22108e-05	0.000817674			0.282198	7.68571	1.12738	1.40381	1.52474	0.281982	0.282337		0.282199	6.75385	1.12738	1.45274	1.60477	0.282009	0.282368		0.282198	8.44621	1.12738	1.36629	1.46327	0.28196	0.282311		0.282199	6.75313	1.12738	1.45118	1.60441	0.282009	0.282368
KK-K1275L-86	1455.6	0.282144	3.00957e-05	0.000827063			0.28212	10.435	1.05335	1.50352	1.53693	0.281826	0.282157		0.282121	9.31667	1.05335	1.55593	1.62331	0.281858	0.282194		0.28212	11.3478	1.05335	1.46334	1.47054	0.2818	0.282126		0.282121	9.31579	1.05335	1.55426	1.62319	0.281858	0.282194
KK-K1275L-94	1329.8	0.282158	2.88197e-05	0.000756211			0.282139	8.14624	1.00869	1.48139	1.58197	0.281909	0.282253		0.282139	7.1253	1.00869	1.53302	1.6668	0.281938	0.282287		0.282138	8.9795	1.00869	1.4418	1.5168	0.281885	0.282225		0.282139	7.12457	1.00869	1.53138	1.66649	0.281938	0.282287
KK-K1275L-92	1233.9	0.282172	3.32092e-05	0.000813128			0.282152	6.39339	1.16232	1.46545	1.61644	0.281972	0.282326		0.282153	5.44983	1.16232	1.51652	1.69992	0.281999	0.282357		0.282152	7.16344	1.16232	1.42628	1.55232	0.28195	0.2823		0.282153	5.4491	1.16232	1.5149	1.69947	0.281999	0.282357
KK-K1275L-60	1207.8	0.28214	3.19865e-05	0.00088276			0.282119	4.6228	1.11953	1.5105	1.70583	0.281989	0.282345		0.28212	3.70186	1.11953	1.56314	1.79154	0.282016	0.282376		0.282119	5.37438	1.11953	1.47013	1.64	0.281967	0.28232		0.28212	3.70109	1.11953	1.56147	1.79096	0.282016	0.282376
KK-K1275L-37	1444.8	0.28227	4.92077e-05	0.00140601			0.28223	14.0822	1.72227	1.35493	1.30084	0.281833	0.282165		0.282231	12.9919	1.72227	1.40215	1.37781	0.281865	0.282202		0.282229	14.9722	1.72227	1.31871	1.24168	0.281807	0.282135		0.282231	12.9904	1.72227	1.40065	1.37798	0.281865	0.282202
KK-K1275L-32	1240.5	0.282266	3.39281e-05	0.000750718			0.282248	9.93167	1.18748	1.3371	1.4018	0.281968	0.282321		0.282248	8.98076	1.18748	1.3837	1.47837	0.281995	0.282352		0.282247	10.7077	1.18748	1.30136	1.34298	0.281945	0.282295		0.282248	8.98009	1.18748	1.38222	1.47816	0.281995	0.282352
KK-K1275L-33	1265.3	0.282186	4.26228e-05	0.00142047			0.282151	7.09208	1.4918	1.4693	1.59745	0.281951	0.282302		0.282152	6.14194	1.4918	1.52051	1.67991	0.281979	0.282334		0.28215	7.86753	1.4918	1.43003	1.53411	0.281928	0.282275		0.282152	6.14064	1.4918	1.51888	1.67955	0.281979	0.282334
KK-K1275L-22	1229.7	0.282227	4.87515e-05	0.0012087			0.282198	7.91058	1.7063	1.40633	1.51907	0.281975	0.282329		0.282199	6.98165	1.7063	1.45535	1.59845	0.282002	0.28236		0.282197	8.66869	1.7063	1.36875	1.4581	0.281952	0.282303		0.282199	6.98057	1.7063	1.45379	1.59813	0.282002	0.28236
KK-K1275L-25	1262.9	0.282182	3.45331e-05	0.00132613			0.282149	6.96354	1.20866	1.47165	1.60357	0.281953	0.282304		0.28215	6.01245	1.20866	1.52294	1.68635	0.281981	0.282336		0.282148	7.73976	1.20866	1.43232	1.53998	0.28193	0.282277		0.28215	6.01124	1.20866	1.52131	1.68598	0.281981	0.282336
KK-K1275L-24	1456.2	0.282219	4.52543e-05	0.00135398			0.282181	12.6018	1.5839	1.42169	1.40222	0.281826	0.282156		0.282182	11.5009	1.5839	1.47124	1.48296	0.281858	0.282194		0.28218	13.5003	1.5839	1.38369	1.34016	0.281799	0.282126		0.282182	11.4995	1.5839	1.46967	1.48302	0.281858	0.282194
Dox Formation
KK-T1269-1	1406	0.282106	9.13839e-05	0.00200544			0.282051	6.80729	3.19844	1.60388	1.72408	0.281859	0.282195		0.282053	5.76785	3.19844	1.65978	1.8129	0.28189	0.282231		0.282049	7.65571	3.19844	1.56102	1.65583	0.281833	0.282165		0.282052	5.7658	3.19844	1.658	1.8126	0.28189	0.282231
KK-T1269-1-26	1325.4	0.281636	0.000137235	0.00252964			0.281571	-12.1009	4.80321	2.28018	2.82126	0.281912	0.282256		0.281573	-13.0607	4.80321	2.35965	2.94389	0.281941	0.28229		0.281569	-11.3175	4.80321	2.21924	2.7271	0.281888	0.282228		0.281573	-13.0631	4.80321	2.35712	2.94231	0.281941	0.28229
KK-T1269-1-68	1363.1	0.282139	3.25938e-05	0.00264568			0.282068	6.42445	1.14078	1.58605	1.71461	0.281887	0.282227		0.28207	5.43833	1.14078	1.64132	1.80079	0.281917	0.282262		0.282066	7.22931	1.14078	1.54366	1.6484	0.281862	0.282199		0.28207	5.43571	1.14078	1.63957	1.80049	0.281917	0.282262
KK-T1269-1-77	1380.1	0.282127	3.74529e-05	0.00119984			0.282095	7.77057	1.31085	1.5407	1.64425	0.281876	0.282214		0.282096	6.72442	1.31085	1.59439	1.73149	0.281906	0.28225		0.282094	8.62445	1.31085	1.49952	1.57721	0.281851	0.282186		0.282096	6.72322	1.31085	1.59269	1.73119	0.281906	0.28225
KK-T1269-1-76	1263	0.282145	3.84769e-05	0.000942524			0.282122	5.99556	1.34669	1.50628	1.66365	0.281953	0.282303		0.282123	5.03305	1.34669	1.55878	1.74918	0.281981	0.282336		0.282121	6.7811	1.34669	1.46603	1.59795	0.28193	0.282277		0.282123	5.03219	1.34669	1.55711	1.74871	0.281981	0.282336
KK-T1269-1-50	1252.2	0.28229	3.7968e-05	0.00209602			0.282239	9.89061	1.32888	1.3523	1.41342	0.28196	0.282312		0.28224	8.97026	1.32888	1.39943	1.48811	0.281988	0.282344		0.282237	10.6417	1.32888	1.31616	1.35604	0.281937	0.282286		0.28224	8.96836	1.32888	1.39793	1.48798	0.281988	0.282344
KK-T1269-1-64	1159.6	0.282147	4.0261e-05	0.000223332			0.282142	4.29834	1.40913	1.47594	1.68851	0.282021	0.282382		0.282142	3.39708	1.40913	1.52738	1.77362	0.282046	0.282411		0.282142	5.03384	1.40913	1.43649	1.62315	0.282	0.282358		0.282142	3.39689	1.40913	1.52575	1.77297	0.282046	0.282411
Dox Formation
KK-T1269-2-3	1234.9	0.282329	9.80033e-05	0.00306892			0.282255	10.0534	3.43012	1.33375	1.38988	0.281971	0.282325		0.282257	9.17447	3.43012	1.38024	1.46157	0.281999	0.282356		0.282253	10.7708	3.43012	1.29811	1.33482	0.281949	0.282299		0.282257	9.17172	3.43012	1.37876	1.46151	0.281999	0.282356
KK-T1269-2-75	1271.9	0.282233	3.64164e-05	0.00175494			0.28219	8.61403	1.27458	1.4178	1.50807	0.281947	0.282297		0.282191	7.6687	1.27458	1.46722	1.58705	0.281975	0.282329		0.282189	9.38556	1.27458	1.37991	1.4474	0.281924	0.28227		0.282191	7.66708	1.27458	1.46564	1.58681	0.281975	0.282329
KK-T1269-2-73	1344.8	0.282249	3.7445e-05	0.000435731			0.282237	12.0063	1.31058	1.34854	1.35324	0.281899	0.282241		0.282238	10.9629	1.31058	1.39554	1.43147	0.281929	0.282276		0.282237	12.8579	1.31058	1.3125	1.29312	0.281875	0.282213		0.282238	10.9625	1.31058	1.39405	1.43141	0.281929	0.282276
KK-T1269-2-72	1240.2	0.282133	3.34281e-05	0.0027101			0.282068	3.54702	1.16998	1.59619	1.79744	0.281968	0.282321		0.28207	2.65431	1.16998	1.65182	1.88359	0.281995	0.282352		0.282066	4.27558	1.16998	1.55353	1.73127	0.281945	0.282295		0.28207	2.65188	1.16998	1.65005	1.88306	0.281995	0.282352
KK-T1269-2-91	1388.1	0.282216	3.8191e-05	0.000683338			0.282198	11.6026	1.33668	1.40116	1.41193	0.281871	0.282208		0.282198	10.5328	1.33668	1.44999	1.49272	0.281901	0.282244		0.282197	12.4758	1.33668	1.36371	1.34984	0.281845	0.282179		0.282198	10.5322	1.33668	1.44844	1.49265	0.281901	0.282244
KK-T1269-2-45	1122.1	0.282412	6.53707e-05	0.00304843			0.282345	10.639	2.28797	1.21394	1.26603	0.282045	0.28241		0.282347	9.8416	2.28797	1.25625	1.3312	0.28207	0.282439		0.282343	11.2896	2.28797	1.1815	1.21597	0.282025	0.282387		0.282347	9.83913	2.28797	1.25491	1.33113	0.28207	0.282439
KK-T1269-2-49	1234.8	0.282377	6.33344e-05	0.00069714			0.28236	13.7942	2.21671	1.18597	1.15642	0.281971	0.282325		0.282361	12.8459	2.21671	1.22731	1.22473	0.281999	0.282356		0.28236	14.5682	2.21671	1.15427	1.10393	0.281949	0.282299		0.282361	12.8453	2.21671	1.22599	1.22479	0.281999	0.282356
Apache Group, Arizona (this study)
Laser Ablation Split Stream- Curtin University (see methods page)
									U-Pb Data																Hf Data
Analysis	Final207_235	Final207_235_Int2SE	Final206_238	Final206_238_Int2SE	ErrorCorrelation_6_38vs7_35	Final238_206	Final238_206_Int2SE	Final207_206	Final207_206_Int2SE	ErrorCorrelation_38_6vs7_6	FinalAge207_235	FinalAge207_235_Int2SE	FinalAge206_238	FinalAge206_238_Int2SE	FinalAge207_206	FinalAge207_206_Int2SE	conc vs disc	Best Age	±2	Hf178Hf177c	2s	Hf180Hf177c	2s	Hf176Hf177mF	2s	Yb176Hf177	2s	Lu176Hf177	2s	TotalHf	2s	StdCorr_176Hf_177Hf	2s		Best Age	±2	εHf	2s
Troy Quartzite, Chediski Mbr, McFadden Peak Lookout, 33.909144, -110.9627255
2017-445 - 2	3.3	0.24	0.2631	0.008	-0.028559	3.80084	0.115571	0.0926	0.0076	0.42654	1463	57	1504	41	1410	170	concordant	1504	41
2017-445 - 3	2.07	0.27	0.19	0.012	0.083211	5.26316	0.33241	0.088	0.012	0.20746	1149	98	1119	64	1230	300	concordant	1119	64	1.46701	0.00015	1.88683	0.00024	0.279986	4.3e-05	0.03805	0.0003	0.0010667	5.1e-06	4.22	0.17	0.282046	5.4e-05		1119	64	-1.7	0.5
2017-445 - 4	3.35	0.27	0.2521	0.0074	-0.046477	3.96668	0.116436	0.0968	0.0086	0.38271	1490	64	1448	38	1480	180	concordant	1448	38	1.46705	0.00016	1.88678	0.00026	0.280139	4.9e-05	0.02487	0.00056	0.00069	1.2e-05	3.61	0.21	0.2822	5.5e-05		1448	38	11.3	0.6
2017-445 - 5	3.65	0.25	0.2597	0.0078	-0.13409	3.8506	0.115651	0.1032	0.0084	0.51821	1544	55	1487	40	1620	160	discordant			1.46738	0.00014	1.88691	0.00021	0.280011	3.3e-05	0.04673	0.00053	0.001311	1.9e-05	4.46	0.11	0.282071	4.5e-05
2017-445 - 6	2.76	0.39	0.2039	0.0073	0.18785	4.90437	0.175585	0.096	0.013	0.0047548	1330	100	1195	39	1440	280	discordant			1.4671	0.00016	1.88678	0.00024	0.279996	5.1e-05	0.03855	0.00038	0.0011155	6.7e-06	4.23	0.14	0.282065	5.3e-05
2017-445 - 7	2.82	0.31	0.186	0.012	0.12762	5.37634	0.346861	0.112	0.013	0.42124	1360	75	1095	65	1820	220	discordant			1.46702	0.0002	1.88674	0.00022	0.280154	4e-05	0.044	0.0013	0.001184	3.5e-05	3.86	0.22	0.282231	4.2e-05
2017-445 - 8	2.73	0.52	0.229	0.013	-0.10755	4.36681	0.247898	0.089	0.018	0.19863	1250	150	1324	67	990	410	concordant	1324	67	1.46708	0.0002	1.8868	0.00017	0.280159	4.3e-05	0.0386	0.0021	0.001036	5.1e-05	3.89	0.19	0.282246	5.2e-05		1324	67	9.9	0.5
2017-445 - 9	2.41	0.32	0.2156	0.0083	0.12222	4.63822	0.178559	0.078	0.01	0.20456	1237	89	1265	42	1200	260	concordant	1265	42	1.46718	0.00018	1.88689	0.00025	0.280109	3.8e-05	0.0338	0.0013	0.000933	3.7e-05	3.63	0.11	0.282172	4.4e-05		1265	42	6	0.4
2017-445 - 10	2.31	0.22	0.2229	0.0069	-0.078923	4.48632	0.138877	0.0749	0.0075	0.38724	1239	54	1296	36	1120	170	discordant			1.46708	0.00022	1.88688	0.00027	0.280177	6.6e-05	0.029231	6.8e-05	0.0008186	4.9e-06	3.39	0.17	0.282217	6.8e-05
2017-445 - 11	3.1	0.29	0.2553	0.0086	0.22013	3.91696	0.131946	0.0882	0.0079	0.084067	1406	70	1464	44	1300	170	concordant	1464	44	1.46702	0.0002	1.88656	0.00023	0.280102	5.6e-05	0.03695	0.0004	0.0010009	7.5e-06	3.73	0.18	0.282203	6.2e-05		1464	44	11.4	0.6
2017-445 - 12	2.4	0.46	0.195	0.011	0.23179	5.12821	0.289283	0.089	0.017	0.011604	1180	150	1155	56	1100	410	concordant	1155	56	1.46694	0.00017	1.88683	0.00019	0.280025	6.3e-05	0.0374	0.0026	0.00107	7.1e-05	4.18	0.28	0.28208	6.5e-05		1155	56	0.3	0.7
2017-445 - 13	2.78	0.3	0.212	0.01	-0.13971	4.71698	0.222499	0.093	0.012	0.54709	1359	88	1238	53	1470	260	discordant			1.46714	0.00016	1.88701	0.00023	0.280129	5.5e-05	0.0321	0.0017	0.000879	4.1e-05	3.35	0.14	0.282203	5.6e-05
2017-445 - 14	3.27	0.22	0.2471	0.0061	0.14836	4.04695	0.0999043	0.0931	0.006	0.30104	1477	53	1423	32	1480	120	discordant			1.4671	0.00014	1.88674	0.00022	0.280169	6.1e-05	0.0372	0.0013	0.001029	3.7e-05	3.52	0.13	0.282232	6.8e-05
2017-445 - 16	3.67	0.24	0.2581	0.0069	0.45743	3.87447	0.103579	0.1016	0.0059	-0.077669	1560	53	1485	34	1640	110	discordant
2017-445 - 17	2.3	0.18	0.1889	0.0065	0.29284	5.29381	0.182159	0.0894	0.0068	0.2123	1204	57	1114	35	1390	150	discordant			1.46691	0.0002	1.88656	0.0002	0.280014	3.4e-05	0.07709	0.00069	0.002163	2.3e-05	4.43	0.27	0.282101	4.2e-05
2017-445 - 18	3.77	0.28	0.2578	0.0084	0.41541	3.87898	0.12639	0.1016	0.0071	0.024239	1600	54	1477	43	1700	130	discordant			1.4668	0.0002	1.88663	0.00017	0.280071	4.6e-05	0.0526	0.0044	0.00135	0.0001	3.88	0.24	0.282168	5.4e-05
2017-445 - 19	4.33	0.32	0.2895	0.0084	0.2729	3.45423	0.100226	0.1093	0.0081	0.099072	1689	63	1637	42	1720	150	concordant	1637	42	1.46724	0.00018	1.88687	0.00025	0.279994	3.6e-05	0.03616	0.00019	0.0010358	2.2e-06	4.1	0.16	0.282078	4.6e-05		1637	42	10.8	0.5
2017-445 - 20	2.29	0.14	0.148	0.004	0.13794	6.75676	0.182615	0.1126	0.0077	0.24008	1216	47	889	22	1850	120	discordant			1.467	0.00011	1.88686	0.00019	0.279927	4.7e-05	0.0341	0.0028	0.000909	5e-05	4	0.22	0.281995	5.2e-05
2017-445 - 21	2.6	0.55	0.214	0.013	-0.088885	4.6729	0.283868	0.089	0.02	0.31338	1340	150	1246	70	1360	410	concordant	1246	70	1.46654	0.00028	1.88659	0.00032	0.280051	5.4e-05	0.0791	0.0036	0.002057	4.4e-05	2.6	0.35	0.282127	5.5e-05		1246	70	3.1	0.6
2017-445 - 22	2.56	0.26	0.2158	0.0082	0.09096	4.63392	0.17608	0.0863	0.0096	0.25761	1269	80	1258	43	1220	220	concordant	1258	43	1.46704	0.00017	1.88671	0.00027	0.280102	3.4e-05	0.01968	0.00055	0.000561	1.3e-05	3.44	0.12	0.282181	4.8e-05		1258	43	6.5	0.5
2017-445 - 23	4.17	0.74	0.268	0.017	0.47913	3.73134	0.23669	0.112	0.018	-0.076197	1690	160	1543	93	1610	370	concordant	1543	93	1.46711	0.0002	1.88672	0.00025	0.280102	4.2e-05	0.02741	0.00037	0.0007641	7e-06	3.91	0.14	0.282173	5.5e-05		1543	93	12.3	0.6
2017-445 - 24	2.47	0.2	0.1815	0.0059	0.56503	5.50964	0.179101	0.1027	0.0086	-0.20043	1247	58	1074	32	1620	140	discordant			1.46698	0.00017	1.88681	0.00016	0.279988	4e-05	0.0302	0.0012	0.000848	3.3e-05	3.76	0.19	0.282085	4.6e-05
2017-445 - 26	1.93	0.49	0.204	0.011	0.044305	4.90196	0.264321	0.068	0.017	0.14851	1170	150	1195	57	910	440	concordant	1195	57	1.46703	0.00022	1.88663	0.00028	0.280156	6.6e-05	0.02102	0.00071	0.000582	2.2e-05	3.25	0.13	0.28219	5.8e-05		1195	57	5.4	0.6
2017-445 - 27	2.74	0.38	0.2033	0.0085	-0.12335	4.91884	0.205657	0.092	0.014	0.41548	1290	120	1200	43	1310	350	concordant	1200	43	1.46707	0.00016	1.88657	0.00026	0.280166	5.5e-05	0.0482	0.0033	0.001321	8e-05	3.19	0.17	0.282235	5.7e-05		1200	43	6.5	0.6
2017-445 - 28	2.67	0.4	0.216	0.013	-0.056012	4.62963	0.278635	0.094	0.016	0.48466	1310	120	1276	70	1300	360	concordant	1276	70	1.46708	0.00013	1.88691	0.00028	0.280158	6.6e-05	0.04867	0.00011	0.0012997	5.5e-06	3.52	0.12	0.282222	7.6e-05		1276	70	7.7	0.8
2017-445 - 29	3.49	0.22	0.2579	0.0056	0.1893	3.87747	0.0841948	0.0975	0.0057	0.15395	1513	50	1479	29	1560	100	concordant	1479	29	1.46686	0.00022	1.88696	0.00022	0.280113	4.9e-05	0.02076	0.00086	0.000593	2.6e-05	3.11	0.18	0.282161	5.4e-05		1479	29	10.7	0.5
2017-445 - 30	3.13	0.55	0.231	0.013	0.3333	4.329	0.243624	0.109	0.018	0.03162	1450	150	1333	70	1570	340	concordant	1333	70	1.4669	0.0002	1.88663	0.00026	0.279983	6.4e-05	0.05327	0.00036	0.0015202	3.3e-06	4.29	0.23	0.282069	6.9e-05		1333	70	3.3	0.7
2017-445 - 31	2.12	0.23	0.1038	0.0053	0.62172	9.63391	0.491905	0.148	0.013	-0.15265	1165	75	636	31	2310	150	discordant			1.46658	0.00017	1.88685	0.0003	0.280119	8e-05	0.0396	0.0017	0.001139	3.3e-05	2.01	0.27	0.282204	8.9e-05
2017-445 - 32	2.33	0.3	0.2105	0.0061	0.21021	4.75059	0.137666	0.0793	0.0097	0.015799	1172	97	1231	32	1010	290	concordant	1231	32	1.4668	0.00018	1.88671	0.00022	0.280159	7.2e-05	0.1395	0.0042	0.003164	9.4e-05	2.67	0.17	0.282253	7.5e-05		1231	32	6.3	0.8
2017-445 - 34	3.45	0.25	0.2463	0.0068	0.26683	4.06009	0.112093	0.1018	0.0073	0.099313	1510	59	1418	35	1620	130	discordant
2017-445 - 35	3.1	0.81	0.205	0.012	-0.053304	4.87805	0.285544	0.109	0.029	0.29913	1270	240	1209	66	1040	620	concordant	1209	66	1.46702	0.00018	1.88674	0.00019	0.279999	4.4e-05	0.0495	0.0011	0.001408	2.3e-05	4.6	0.27	0.282108	5.1e-05		1209	66	2.2	0.5
2017-445 - 36	2.77	0.75	0.214	0.014	0.099664	4.6729	0.305704	0.089	0.023	0.11986	1330	200	1244	73	1090	530	concordant	1244	73	1.4671	0.00019	1.88675	0.00022	0.280084	3.2e-05	0.03426	0.00023	0.0009343	8.2e-06	3.28	0.11	0.282153	4.1e-05		1244	73	4.9	0.4
2017-445 - 37	2.45	0.33	0.2132	0.0098	0.060466	4.69043	0.215601	0.089	0.012	0.24327	1257	98	1244	52	1190	290	concordant	1244	52	1.46718	0.00017	1.88707	0.00025	0.280153	6e-05	0.0512	0.001	0.001389	3.1e-05	2.9	0.11	0.282208	6e-05		1244	52	6.5	0.6
2017-445 - 38	1.47	0.13	0.1186	0.007	0.47358	8.4317	0.497655	0.0917	0.0075	0.25115	905	53	721	40	1400	150	discordant			1.46696	0.00021	1.8869	0.00023	0.280084	5.8e-05	0.0434	0.0037	0.00119	0.0001	3.34	0.25	0.282176	6.8e-05
2017-445 - 39	3.6	0.24	0.2346	0.0059	0.19075	4.26258	0.1072	0.1092	0.0073	0.24144	1544	51	1358	31	1790	130	discordant			1.46702	0.00021	1.88667	0.00024	0.280039	6.5e-05	0.1066	0.0097	0.00249	0.00022	3.49	0.27	0.282132	6.2e-05
2017-445 - 40	2.56	0.28	0.1849	0.007	0.35715	5.40833	0.20475	0.099	0.011	-0.0093096	1282	84	1092	38	1590	210	discordant			1.46706	0.00021	1.88665	0.00025	0.280044	4e-05	0.04746	0.00059	0.001302	1.7e-05	4.58	0.17	0.282124	5e-05
2017-445 - 42	2.87	0.24	0.2585	0.0068	-0.099389	3.86847	0.101763	0.085	0.0081	0.37238	1365	67	1481	35	1220	200	discordant
2017-445 - 43	2.83	0.38	0.218	0.011	0.36996	4.58716	0.231462	0.094	0.013	0.28897	1330	96	1266	58	1360	280	concordant	1266	58	1.46717	0.00016	1.88663	0.00017	0.280054	5.1e-05	0.02764	0.00048	0.000797	1.7e-05	4.32	0.19	0.282143	5.6e-05		1266	58	5.1	0.6
2017-445 - 44	2.21	0.38	0.2	0.011	0.39982	5	0.275	0.082	0.014	-0.017724	1160	140	1184	63	1010	380	concordant	1184	63	1.46679	0.00025	1.88689	0.00028	0.280144	4.6e-05	0.02548	0.00069	0.000713	1.4e-05	3.15	0.3	0.282232	5.4e-05		1184	63	6.6	0.5
2017-445 - 45	1.92	0.53	0.213	0.017	-0.11904	4.69484	0.374705	0.069	0.02	0.41734	1100	220	1239	89	410	590	concordant	1239	89	1.4671	0.00021	1.88683	0.00026	0.280093	4.3e-05	0.032	0.0021	0.000864	5.5e-05	3.455	0.088	0.282142	5.1e-05		1239	89	4.5	0.5
2017-445 - 46	2.84	0.52	0.228	0.012	0.055757	4.38596	0.23084	0.094	0.018	0.14297	1380	140	1321	60	1360	370	concordant	1321	60	1.46708	0.00014	1.88679	0.00023	0.28005	5.8e-05	0.03293	0.00021	0.0009107	9.4e-06	3.88	0.13	0.282115	6.1e-05		1321	60	5.3	0.6
2017-445 - 47	3.84	0.37	0.267	0.01	0.025968	3.74532	0.140274	0.103	0.011	0.32477	1595	81	1522	53	1630	210	concordant	1522	53
2017-445 - 48	3.2	0.19	0.234	0.0063	0.10212	4.2735	0.115056	0.0983	0.0064	0.25497	1465	52	1355	33	1640	130	discordant			1.46704	0.00018	1.88656	0.00023	0.280011	4.4e-05	0.04646	0.00061	0.00128	1.3e-05	3.74	0.24	0.282117	4.2e-05
2017-445 - 49	3.87	0.27	0.2685	0.0067	0.22228	3.72439	0.0929365	0.1052	0.0072	0.12338	1610	55	1532	34	1700	140	discordant			1.46701	0.00017	1.88679	0.00018	0.279996	3.9e-05	0.0524	0.0018	0.001448	4.8e-05	4.34	0.19	0.282083	4.4e-05
2017-445 - 51	2.52	0.39	0.212	0.0088	0.025774	4.71698	0.195799	0.083	0.013	0.21566	1220	120	1237	47	1290	320	concordant	1237	47	1.46697	0.00022	1.88676	0.00022	0.280083	5.5e-05	0.045	0.0017	0.001148	4e-05	3.54	0.19	0.282147	6e-05		1237	47	4.4	0.6
2017-445 - 53	3.34	0.28	0.2525	0.0062	-0.1494	3.9604	0.0972454	0.0981	0.009	0.41661	1468	66	1451	32	1470	180	concordant	1451	32
2017-445 - 54	2.64	0.48	0.204	0.012	0.024827	4.90196	0.288351	0.098	0.019	0.47209	1330	140	1193	64	1450	410	concordant	1193	64	1.46707	0.00017	1.88651	0.00021	0.280049	4.7e-05	0.04056	0.00026	0.001153	1.4e-05	4.21	0.22	0.282103	5.3e-05		1193	64	1.8	0.5
2017-445 - 55	3.02	0.38	0.2094	0.0082	0.32061	4.77555	0.187008	0.104	0.012	0.12073	1398	94	1224	44	1620	230	discordant			1.46705	0.00022	1.88683	0.00016	0.280192	4.8e-05	0.0473	0.0021	0.001241	3.2e-05	3.18	0.11	0.282222	5.2e-05
2017-445 - 56	2.71	0.2	0.1846	0.0069	0.28465	5.41712	0.202482	0.1087	0.0083	0.24972	1335	59	1091	37	1770	150	discordant			1.46711	0.00025	1.88657	0.0002	0.280107	5.4e-05	0.0756	0.0071	0.00201	0.00018	3.184	0.092	0.282153	6.6e-05
2017-445 - 57	3.99	0.32	0.272	0.012	0.25543	3.67647	0.162197	0.1114	0.0098	0.19435	1635	61	1546	63	1810	160	discordant			1.46715	0.00019	1.88684	0.00026	0.280112	4.6e-05	0.0566	0.0022	0.001536	6.7e-05	3.85	0.21	0.282127	5.4e-05
2017-445 - 58	2.68	0.28	0.2192	0.0086	-0.006889	4.56204	0.178985	0.0895	0.0096	0.36747	1317	73	1283	47	1360	210	concordant	1283	47	1.46692	0.00024	1.88666	0.00019	0.280033	5e-05	0.04589	0.00063	0.001252	1.6e-05	3.54	0.23	0.282103	6.2e-05		1283	47	3.7	0.6
2017-445 - 59	2.79	0.29	0.221	0.011	0.078467	4.52489	0.225221	0.091	0.011	0.37093	1370	91	1294	57	1410	220	concordant	1294	57	1.46719	0.00014	1.88707	0.00019	0.280089	4.3e-05	0.02642	0.00045	0.000757	1.4e-05	4.2	0.13	0.282138	4.6e-05		1294	57	5.6	0.5
2017-445 - 60	2.9	0.3	0.2179	0.0069	0.040403	4.58926	0.145323	0.094	0.01	0.21834	1378	78	1270	37	1480	210	discordant			1.46699	0.00017	1.88664	0.00018	0.280102	5.2e-05	0.0196	0.00028	0.0005584	5.9e-06	3.89	0.19	0.282168	6e-05
2017-445 - 61	1.249	0.095	0.0839	0.0042	0.41053	11.919	0.596658	0.1092	0.0081	0.18255	820	46	519	25	1740	130	discordant			1.46704	0.00019	1.88673	0.00021	0.280145	3e-05	0.02787	0.00054	0.000771	1.1e-05	3.99	0.18	0.282221	3.7e-05
2017-445 - 62	2.58	0.34	0.209	0.014	0.034064	4.78469	0.320505	0.093	0.014	0.40744	1330	100	1220	74	1420	290	discordant			1.46681	0.00025	1.88675	0.00026	0.280053	7.1e-05	0.217	0.012	0.00496	0.00028	3.03	0.19	0.28213	7.7e-05
2017-445 - 63	2.19	0.6	0.208	0.018	0.22383	4.80769	0.41605	0.08	0.021	0.036528	1120	180	1224	99	740	460	concordant	1224	99	1.46726	0.00022	1.88667	0.00022	0.280156	4.4e-05	0.01749	0.00038	0.0004996	8.7e-06	3.86	0.15	0.282229	5.1e-05		1224	99	7.5	0.5
2017-445 - 64	3.26	0.3	0.2552	0.0091	0.26732	3.9185	0.139727	0.0934	0.0088	0.054168	1442	77	1463	46	1490	200	concordant	1463	46	1.46701	0.00019	1.88682	0.00028	0.280152	5.6e-05	0.0439	0.0043	0.000995	7.5e-05	3.03	0.18	0.282205	6.5e-05		1463	46	11.5	0.7
2017-445 - 65	2.56	0.75	0.209	0.015	-0.025818	4.78469	0.343399	0.094	0.024	0.25749	1070	260	1216	81	850	600	concordant	1216	81	1.46713	0.00018	1.88658	0.0002	0.280074	3.9e-05	0.04206	0.0008	0.001194	1.6e-05	4.53	0.17	0.282168	4.4e-05		1216	81	4.6	0.4
2017-445 - 66	3.33	0.32	0.2605	0.0076	-0.031926	3.83877	0.111995	0.0917	0.0089	0.36459	1473	70	1491	39	1460	170	concordant	1491	39	1.46721	0.00015	1.88668	0.00026	0.280119	5.7e-05	0.0252	0.00041	0.000702	1.3e-05	3.43	0.12	0.282179	6.7e-05		1491	39	11.5	0.7
2017-445 - 68	2.35	0.53	0.191	0.012	0.073609	5.2356	0.328938	0.093	0.023	0.24832	1250	150	1135	68	1040	510	concordant	1135	68	1.46723	0.00016	1.88655	0.00019	0.280139	4.8e-05	0.02523	0.00049	0.000692	1.2e-05	4.01	0.11	0.282208	5.1e-05		1135	68	4.7	0.5
2017-445 - 69	3.15	0.34	0.2614	0.0085	0.12125	3.82556	0.124396	0.0855	0.0086	0.20698	1451	74	1495	43	1350	180	concordant	1495	43	1.46701	0.00018	1.88658	0.00027	0.280079	5.2e-05	0.02624	0.00037	0.0007297	5.8e-06	3.68	0.2	0.282138	5.2e-05		1495	43	10.1	0.5
2017-445 - 70	2.93	0.28	0.2045	0.0069	0.35817	4.88998	0.164992	0.1033	0.0093	0.1079	1387	73	1198	37	1640	180	discordant			1.46702	0.00023	1.88673	0.00017	0.279997	5.3e-05	0.0376	0.0024	0.001061	5.9e-05	3.26	0.15	0.282052	6e-05
2017-445 - 71	2.24	0.53	0.215	0.014	0.32473	4.65116	0.302866	0.074	0.018	0.077747	1210	170	1251	77	720	490	concordant	1251	77	1.46707	0.00019	1.88675	0.00016	0.280142	3.7e-05	0.02614	0.00054	0.000705	1.3e-05	3.96	0.17	0.282178	3.5e-05		1251	77	6.1	0.4
2017-445 - 72	2.75	0.57	0.206	0.015	0.31839	4.85437	0.353473	0.097	0.019	0.058608	1260	160	1200	82	1160	430	concordant	1200	82	1.46721	0.00016	1.88673	0.00022	0.280082	4e-05	0.03437	0.00022	0.0009412	8.7e-06	3.631	0.074	0.282109	3.8e-05		1200	82	2.4	0.4
2017-445 - 73	3.98	0.56	0.274	0.017	0.34268	3.64963	0.226437	0.101	0.013	0.081738	1580	110	1553	84	1580	240	concordant	1553	84
2017-445 - 74	2.98	0.32	0.2169	0.009	0.0034123	4.61042	0.191304	0.098	0.012	0.44471	1410	80	1263	48	1590	230	discordant
2017-445 - 76	2.73	0.36	0.2137	0.0087	0.2289	4.67946	0.190507	0.097	0.013	0.021873	1350	100	1246	46	1420	290	discordant			1.46718	0.00018	1.88675	0.00027	0.280046	4.3e-05	0.0374	0.001	0.001069	3.1e-05	4.01	0.12	0.282089	4.5e-05
2017-445 - 77	3.21	0.25	0.2271	0.0058	0.14332	4.40335	0.112459	0.0999	0.0077	0.28197	1460	58	1318	30	1580	160	discordant			1.46718	0.00016	1.8869	0.00023	0.280132	4.4e-05	0.04245	0.00091	0.001139	1.9e-05	3.44	0.18	0.282166	4.7e-05
2017-445 - 79	1.71	0.12	0.1293	0.0038	0.3026	7.73395	0.227293	0.0992	0.0074	0.10669	1000	46	783	22	1560	150	discordant
2017-445 - 80	3.12	0.87	0.199	0.016	0.059763	5.02513	0.40403	0.119	0.034	0.26776	1260	300	1162	86	1340	650	concordant	1162	86	1.46686	0.00019	1.88671	0.0003	0.280125	5.7e-05	0.144	0.014	0.00311	0.00024	3.25	0.21	0.282196	6e-05		1162	86	3	0.6
2017-445 - 81	4.32	0.66	0.334	0.021	0.21731	2.99401	0.188246	0.098	0.016	0.26915	1670	140	1870	110	1300	360	discordant			1.46673	0.0004	1.8869	0.00033	0.280178	5e-05	0.0328	0.002	0.000986	3e-05	2.83	0.26	0.282222	6.3e-05
2017-445 - 82	3.39	0.28	0.2487	0.0086	0.30757	4.02091	0.139042	0.101	0.0084	0.08222	1503	60	1430	44	1580	150	discordant
2017-445 - 83	2.52	0.25	0.1951	0.0079	0.050901	5.12558	0.207545	0.0943	0.0096	0.30026	1266	70	1147	42	1450	200	discordant			1.46704	0.00016	1.88671	0.0002	0.280034	4.1e-05	0.04478	0.00088	0.001231	1.7e-05	5.01	0.21	0.282112	4.6e-05
2017-445 - 84	3.07	0.8	0.2	0.019	0.037254	5	0.475	0.12	0.031	0.15506	1390	190	1185	96	1370	620	discordant			1.46666	0.00031	1.88675	0.0003	0.280177	5.1e-05	0.0334	0.0016	0.000933	6.2e-05	4.01	0.36	0.282236	5e-05
2017-445 - 85	2.73	0.37	0.218	0.013	0.16653	4.58716	0.273546	0.091	0.012	0.29072	1320	100	1266	68	1360	270	concordant	1266	68	1.4672	0.00025	1.88683	0.00026	0.280128	5.6e-05	0.01965	0.00022	0.0005602	8.6e-06	3.23	0.15	0.282201	5.5e-05		1266	68	7.4	0.6
2017-445 - 87	2.34	0.52	0.213	0.015	-0.12687	4.69484	0.330622	0.101	0.027	0.51581	1350	150	1257	77	1020	550	concordant	1257	77	1.46805	0.00077	1.8873	0.0012	0.28061	0.00033	0.049	0.0051	0.00151	0.00013	0.397	0.017	0.28226	0.00038		1257	77	8.5	3.8
2017-445 - 88	4.28	0.56	0.2559	0.0093	-0.045815	3.90778	0.142018	0.123	0.017	0.39787	1720	110	1476	50	2000	250	discordant			1.46705	0.0002	1.88649	0.00025	0.280156	3.6e-05	0.01807	0.00022	0.0005168	3.7e-06	3.17	0.11	0.2822	3.6e-05
2017-445 - 89	2.33	0.47	0.197	0.011	-0.16783	5.07614	0.283439	0.09	0.019	0.40707	1230	150	1156	59	1210	440	concordant	1156	59	1.46708	0.00021	1.88678	0.00021	0.280027	4.9e-05	0.03249	0.0009	0.000922	2.2e-05	3.046	0.098	0.282084	6e-05		1156	59	0.5	0.6
2017-445 - 90	2.61	0.26	0.2206	0.0081	-0.27276	4.53309	0.166446	0.086	0.011	0.51907	1295	67	1284	43	1370	220	concordant	1284	43	1.46712	0.00019	1.88684	0.00022	0.280129	4.8e-05	0.018266	9.8e-05	0.0005128	4e-06	3.81	0.16	0.282181	6e-05		1284	43	7.1	0.6
2017-445 - 91	2.31	0.28	0.2048	0.0074	0.24345	4.88281	0.17643	0.0794	0.0089	0.10987	1192	87	1206	38	1130	230	concordant	1206	38	1.4671	0.00016	1.88672	0.00018	0.280121	3.8e-05	0.02265	0.00017	0.0006394	2.4e-06	3.91	0.15	0.282186	4.2e-05		1206	38	5.5	0.4
2017-445 - 92	3.4	0.26	0.2618	0.007	0.42563	3.81971	0.102131	0.0934	0.0063	-0.06393	1502	61	1498	36	1500	130	concordant	1498	36	1.46712	0.00022	1.88665	0.00029	0.280121	6.5e-05	0.076	0.0039	0.001972	7.8e-05	3.16	0.14	0.282178	6.9e-05		1498	36	10.3	0.7
2017-445 - 93	2.62	0.48	0.2236	0.0099	-0.059443	4.47227	0.198012	0.091	0.018	0.25502	1220	150	1299	52	1030	420	concordant	1299	52	1.46702	0.00023	1.88658	0.00016	0.280075	4.8e-05	0.05392	0.00091	0.001528	3e-05	4.12	0.22	0.282133	5.4e-05		1299	52	4.9	0.5
2017-445 - 94	3.19	0.53	0.225	0.015	0.23383	4.44444	0.296296	0.108	0.016	0.14092	1460	130	1302	79	1640	340	discordant			1.46735	0.00021	1.88689	0.00023	0.280109	5.4e-05	0.03342	0.00037	0.0009209	6.4e-06	3.43	0.1	0.282157	5.8e-05
2017-445 - 95	2.61	0.46	0.212	0.012	-0.056757	4.71698	0.266999	0.094	0.017	0.26583	1280	140	1234	62	1240	370	concordant	1234	62	1.46698	0.00018	1.88669	0.00024	0.280076	6.5e-05	0.02946	0.00051	0.000821	6.8e-06	3.08	0.21	0.282142	7e-05		1234	62	4.4	0.7
2017-445 - 96	2.61	0.3	0.2001	0.0087	-0.0098308	4.9975	0.217283	0.098	0.013	0.3229	1282	87	1183	45	1550	220	discordant			1.4671	0.00019	1.88669	0.00017	0.280085	3.4e-05	0.02241	0.00037	0.0006464	8.2e-06	4.3	0.17	0.282144	4.1e-05
2017-445 - 97	1.56	0.14	0.1315	0.0061	0.30432	7.60456	0.352759	0.0834	0.0082	0.15752	957	56	795	35	1290	190	discordant			1.46714	0.00015	1.88684	0.00017	0.28016	6e-05	0.0286	0.0013	0.000779	3e-05	3.55	0.11	0.28222	6e-05
2017-445 - 98	2.68	0.23	0.212	0.0061	0.01471	4.71698	0.135724	0.0943	0.0085	0.27415	1315	60	1239	32	1490	180	discordant			1.46701	0.00014	1.88683	0.00017	0.280158	5.1e-05	0.0422	0.001	0.001107	3.1e-05	3.65	0.22	0.282248	5.8e-05
2017-445 - 99	3.24	0.29	0.219	0.011	0.14411	4.56621	0.229353	0.105	0.0098	0.33778	1453	64	1271	58	1670	170	discordant			1.46714	0.00017	1.88678	0.00026	0.28008	4.7e-05	0.03185	8.4e-05	0.0008653	3.7e-06	4.25	0.13	0.282137	5.1e-05
2017-445 - 101	3.74	0.31	0.262	0.014	0.019159	3.81679	0.203951	0.0976	0.0098	0.53203	1572	70	1507	72	1640	200	concordant	1507	72
2017-445 - 102	4.85	0.5	0.296	0.014	0.23277	3.37838	0.159788	0.118	0.013	0.10447	1803	90	1668	68	1890	220	discordant			1.4669	0.00016	1.88685	0.0002	0.279968	5e-05	0.0305	0.0024	0.000826	5.7e-05	3.98	0.2	0.282026	5.1e-05
2017-445 - 103	3.35	0.22	0.2646	0.0081	0.071625	3.77929	0.115693	0.0946	0.0071	0.23085	1500	61	1512	41	1500	160	concordant	1512	41	1.4666	0.00032	1.88662	0.00022	0.279999	5.8e-05	0.0301	0.0017	0.000863	4.9e-05	3.44	0.36	0.282065	6.4e-05		1512	41	7.7	0.6
2017-445 - 104	2.22	0.5	0.216	0.012	-0.22507	4.62963	0.257202	0.072	0.018	0.51401	1160	170	1258	64	790	500	concordant	1258	64	1.46711	0.00021	1.88683	0.00019	0.280027	4.8e-05	0.04148	0.00023	0.001179	1.1e-05	4.11	0.16	0.28209	5.3e-05		1258	64	2.8	0.5
2017-445 - 105	3.44	0.32	0.2566	0.0092	-0.027466	3.89712	0.139725	0.1	0.01	0.32801	1513	77	1471	47	1590	210	concordant	1471	47	1.46707	0.00027	1.88656	0.00028	0.280131	4.5e-05	0.0294	0.003	0.000839	8.4e-05	3.72	0.15	0.282185	4.3e-05		1471	47	11.1	0.4
2017-445 - 106	2.16	0.2	0.1798	0.0052	0.3323	5.56173	0.160851	0.0863	0.0075	-0.00033966	1167	65	1065	28	1330	160	discordant			1.46702	0.0002	1.88676	0.00019	0.279965	5e-05	0.02756	0.00042	0.000791	1.1e-05	4.06	0.14	0.282023	5.9e-05
2017-445 - 107	4.72	0.41	0.298	0.012	0.31253	3.3557	0.135129	0.1165	0.0099	0.1839	1776	74	1676	60	1840	150	discordant			1.46702	0.0002	1.88654	0.00021	0.280138	4.2e-05	0.04131	0.00088	0.001061	1.5e-05	3.95	0.2	0.282222	4.7e-05
2017-445 - 108	5.42	0.43	0.322	0.01	0.34811	3.10559	0.0964469	0.1194	0.0082	0.054315	1877	64	1805	53	1910	120	concordant	1805	53	1.46706	0.00018	1.8869	0.00024	0.27995	4.5e-05	0.02897	0.00014	0.0008351	2e-06	3.24	0.11	0.282001	5.3e-05		1805	53	12	0.5
2017-445 - 109	2.8	0.37	0.2179	0.0086	0.29589	4.58926	0.181127	0.099	0.012	0.17054	1341	97	1269	45	1430	260	concordant	1269	45	1.46716	0.00019	1.88667	0.00025	0.279652	5e-05	0.02999	0.00093	0.000837	2.6e-05	3.74	0.18	0.281704	5.1e-05		1269	45	-10.4	0.5
2017-445 - 110	4.31	0.37	0.2805	0.008	0.31944	3.56506	0.101677	0.1072	0.0087	-0.0044153	1667	75	1600	42	1740	160	concordant	1600	42
2017-445 - 111	2.69	0.29	0.2284	0.0081	0.28791	4.37828	0.155272	0.0857	0.009	-0.035213	1290	83	1325	43	1250	220	concordant	1325	43	1.46704	0.0002	1.88665	0.00023	0.280004	5e-05	0.04441	0.0002	0.0012442	5.3e-06	4.03	0.22	0.282079	5.9e-05		1325	43	3.8	0.6
2017-445 - 112	2.61	0.76	0.212	0.016	0.15408	4.71698	0.355999	0.089	0.026	0.28225	1150	280	1233	85	620	650	concordant	1233	85	1.46698	0.00014	1.88653	0.00015	0.280096	3.5e-05	0.0224	0.00072	0.000627	1.6e-05	4.6	0.19	0.282164	3.5e-05		1233	85	5.3	0.4
2017-445 - 113	3.5	0.25	0.2601	0.0082	0.28031	3.84468	0.121208	0.0975	0.0068	0.25268	1511	57	1496	44	1570	130	concordant	1496	44	1.46715	0.00023	1.88658	0.00026	0.280099	4.2e-05	0.01936	0.00028	0.0005525	6.6e-06	3.25	0.15	0.282157	5.4e-05		1496	44	11	0.5
2017-445 - 115	1.028	0.062	0.058	0.0017	0.30233	17.2414	0.505351	0.1293	0.0082	0.10577	713	32	364	10	2040	120	discordant
2017-445 - 117	2.66	0.3	0.2119	0.0085	0.013238	4.71921	0.189303	0.094	0.011	0.32919	1307	85	1237	45	1430	240	concordant	1237	45
2017-445 - 118	0.979	0.07	0.0537	0.0028	0.37673	18.622	0.970978	0.1363	0.0099	0.38911	699	38	337	17	2180	130	discordant			1.46734	0.00016	1.88689	0.00022	0.280168	5e-05	0.0428	0.0016	0.001137	4e-05	3.7	0.12	0.282216	4.8e-05
2017-445 - 119	3.7	0.32	0.2538	0.0075	0.097647	3.94011	0.116433	0.1047	0.0091	0.27912	1558	67	1457	38	1650	160	discordant			1.46699	0.00021	1.8865	0.00022	0.280042	7.2e-05	0.2104	0.0091	0.00465	0.0002	3.29	0.19	0.282148	7.2e-05
2017-445 - 120	3.43	0.24	0.2603	0.008	0.21564	3.84172	0.118071	0.0957	0.0064	0.1947	1505	57	1490	41	1510	140	concordant	1490	41	1.46707	0.0002	1.88682	0.00013	0.280029	4.5e-05	0.03406	0.00057	0.000963	2e-05	4.31	0.17	0.282109	5.5e-05		1490	41	8.7	0.6
2017-445 - 121	3.45	0.28	0.2385	0.005	-0.056915	4.19287	0.0879009	0.1075	0.0093	0.30019	1504	69	1378	26	1750	160	discordant			1.46711	0.00013	1.88682	0.00022	0.280009	2.8e-05	0.03501	0.00058	0.00099	2e-05	4.29	0.15	0.282068	3.5e-05
2017-445 - 122	3.94	0.27	0.2443	0.0088	0.14196	4.09333	0.147447	0.117	0.0077	0.33124	1605	55	1407	46	1890	110	discordant			1.46707	0.00019	1.88675	0.00014	0.280039	6.4e-05	0.04095	0.0002	0.0011501	9.7e-06	4.14	0.17	0.282119	7.2e-05
2017-445 - 123	2.41	0.15	0.1401	0.0072	0.41245	7.13776	0.366823	0.1246	0.0079	0.32097	1242	46	844	41	1990	120	discordant			1.46708	0.00018	1.887	0.00026	0.279976	4.9e-05	0.0335	0.0011	0.000958	3.1e-05	4.18	0.19	0.282013	5.2e-05
2017-445 - 124	2.59	0.2	0.2151	0.0072	0.23186	4.649	0.155615	0.0886	0.0069	0.19483	1288	59	1255	38	1360	150	concordant	1255	38	1.46689	0.00022	1.88665	0.0003	0.28013	6.9e-05	0.0989	0.0031	0.002448	7.3e-05	2.96	0.14	0.282209	6.9e-05		1255	38	5.9	0.7
2017-445 - 126	2.79	0.34	0.226	0.012	-0.032888	4.42478	0.234944	0.093	0.012	0.31142	1326	90	1309	63	1310	260	concordant	1309	63	1.46691	0.00022	1.88664	0.00026	0.279987	6.8e-05	0.0868	0.002	0.002362	5.4e-05	3.58	0.3	0.282079	7.2e-05		1309	63	2.5	0.7
2017-445 - 127	2.6	0.38	0.218	0.012	-0.12359	4.58716	0.252504	0.089	0.015	0.56317	1310	120	1279	67	1250	340	concordant	1279	67	1.46707	0.00019	1.88677	0.00018	0.280121	5.3e-05	0.0387	0.0012	0.001036	2.6e-05	3.53	0.22	0.282175	5.2e-05		1279	67	6.4	0.5
2017-445 - 128	2.76	0.34	0.2237	0.009	0.1744	4.47027	0.17985	0.09	0.011	0.10645	1332	94	1299	47	1350	250	concordant	1299	47	1.46717	0.00018	1.88672	0.00023	0.280092	5.1e-05	0.02181	0.00016	0.0006276	1.8e-06	4.13	0.19	0.282169	5.5e-05		1299	47	6.9	0.6
2017-445 - 129	3.25	0.24	0.2122	0.0094	0.19097	4.71253	0.208755	0.109	0.0099	0.31721	1452	59	1246	51	1760	150	discordant			1.46726	0.00018	1.88681	0.00025	0.280167	3.7e-05	0.02411	0.00053	0.000678	1.2e-05	3.54	0.1	0.282242	4.2e-05
2017-445 - 130	2.58	0.27	0.2144	0.0059	0.009894	4.66418	0.128352	0.0862	0.0089	0.29299	1277	77	1252	32	1400	180	concordant	1252	32	1.46706	0.00015	1.88688	0.00016	0.280133	4.4e-05	0.0295	0.0002	0.000795	3.6e-06	3.72	0.15	0.282182	4.3e-05		1252	32	6.2	0.4
2017-445 - 131	4.92	0.32	0.3166	0.0093	0.10714	3.15856	0.0927814	0.1127	0.0076	0.2883	1800	53	1772	45	1900	120	discordant			1.46712	0.00017	1.88676	0.00016	0.280147	4.4e-05	0.03228	0.00028	0.0008806	7.1e-06	4.15	0.19	0.282206	5e-05
2017-445 - 132	2.06	0.33	0.211	0.011	0.11443	4.73934	0.247074	0.076	0.013	0.34335	1170	130	1232	57	870	360	concordant	1232	57	1.46694	0.00016	1.88684	0.00018	0.279908	4.2e-05	0.07068	0.00069	0.002048	2.5e-05	3.52	0.19	0.281976	4.7e-05		1232	57	-2.6	0.5
2017-445 - 133	2.66	0.31	0.2011	0.0093	0.13847	4.97265	0.229963	0.101	0.013	0.25895	1299	79	1187	48	1550	230	discordant			1.46718	0.00014	1.88684	0.00021	0.280136	4.9e-05	0.04714	0.00044	0.0013	1.6e-05	3.33	0.11	0.282205	5.2e-05
2017-445 - 134	3.46	0.24	0.2539	0.0058	0.087165	3.93856	0.089971	0.1005	0.0068	0.25736	1530	53	1458	30	1640	140	discordant			1.46702	0.00022	1.88683	0.00024	0.280156	5.8e-05	0.02664	0.00035	0.000791	2.5e-05	3.57	0.17	0.282196	6.4e-05
2017-445 - 135	4.11	0.36	0.26	0.0078	0.4044	3.84615	0.115385	0.1166	0.0096	0.082576	1655	66	1489	40	1930	150	discordant			1.46721	0.00013	1.8865	0.00022	0.279993	4.3e-05	0.0453	0.0007	0.001276	2.3e-05	4.53	0.19	0.282085	4.2e-05
2017-445 - 136	2.52	0.23	0.2	0.0069	0.31833	5	0.1725	0.0886	0.0074	0.082707	1254	66	1174	37	1440	170	discordant			1.46703	0.00018	1.88694	0.00017	0.279593	3.3e-05	0.0435	0.0012	0.00117	2.4e-05	4.02	0.13	0.281663	3.8e-05
2017-445 - 137	2.91	0.32	0.2207	0.0084	0.14796	4.53104	0.172455	0.096	0.011	0.13105	1373	87	1284	44	1450	230	discordant			1.46697	0.00021	1.88671	0.00026	0.280141	6.7e-05	0.0503	0.0033	0.001303	6.3e-05	3.43	0.21	0.282222	6.8e-05
2017-445 - 138	2.77	0.27	0.2114	0.009	0.23588	4.73037	0.201387	0.0931	0.0086	0.2169	1342	75	1234	48	1490	190	discordant			1.46706	0.00024	1.88704	0.00023	0.28007	4.8e-05	0.03341	0.0006	0.000912	1.2e-05	3.58	0.22	0.282139	5.3e-05
2017-445 - 139	2.03	0.42	0.21	0.012	0.32856	4.7619	0.272109	0.076	0.015	-0.12208	1150	140	1236	63	790	420	concordant	1236	63	1.4671	0.00022	1.88679	0.00023	0.280111	4.6e-05	0.02515	0.00041	0.0006855	9.3e-06	3.9	0.16	0.282181	5.5e-05		1236	63	5.9	0.6
2017-445 - 141	2.01	0.14	0.1346	0.0058	0.46953	7.42942	0.320138	0.1107	0.0063	0.16041	1116	50	813	33	1810	120	discordant
2017-445 - 143	3.11	0.24	0.2359	0.0077	0.056995	4.23908	0.138368	0.0942	0.0079	0.37562	1438	59	1364	40	1590	150	discordant			1.46709	0.00021	1.88672	0.00019	0.280015	4.7e-05	0.03568	0.00013	0.0010096	6.8e-06	4.03	0.17	0.282081	5.1e-05
2017-445 - 144	2.25	0.33	0.18	0.0098	-0.11614	5.55556	0.302469	0.09	0.015	0.4234	1180	110	1064	54	1390	310	discordant			1.46707	0.00021	1.88674	0.00021	0.279987	4e-05	0.04303	0.00036	0.0011907	6.8e-06	3.59	0.18	0.282051	4.7e-05
2017-445 - 145	2.86	0.33	0.2169	0.0079	0.21993	4.61042	0.167922	0.0914	0.0093	0.19776	1349	89	1264	42	1400	230	concordant	1264	42	1.46642	0.00022	1.88698	0.00037	0.28027	7.5e-05	0.177	0.015	0.00373	0.0003	2.65	0.38	0.282318	7.7e-05		1264	42	8.8	0.8
2017-445 - 146	2.83	0.18	0.195	0.0083	0.43304	5.12821	0.218277	0.1037	0.0064	0.13972	1358	49	1147	45	1680	120	discordant			1.46696	0.00025	1.88677	0.00023	0.280105	4.4e-05	0.0222	0.0011	0.000624	2.6e-05	3.58	0.17	0.282192	3.9e-05
2017-445 - 147	2.34	0.21	0.1706	0.006	0.42519	5.86167	0.206155	0.0984	0.008	-0.012431	1221	66	1014	33	1550	160	discordant			1.46704	0.00022	1.88675	0.00022	0.280027	5.7e-05	0.0871	0.0059	0.00221	0.00011	3.72	0.18	0.282111	6e-05
2017-445 - 148	2.65	0.34	0.2143	0.0088	-0.19268	4.66636	0.191619	0.093	0.013	0.4665	1330	90	1250	47	1470	270	concordant	1250	47	1.46703	0.00017	1.88693	0.00018	0.280052	3.7e-05	0.04852	0.00036	0.001349	1.4e-05	3.93	0.22	0.282135	5e-05		1250	47	4.1	0.5
2017-445 - 149	2.2	0.19	0.155	0.017	0.73207	6.45161	0.707596	0.1121	0.0086	0.61764	1191	65	922	97	1830	150	discordant			1.46708	0.00011	1.88707	0.00021	0.28011	5.2e-05	0.0267	0.0019	0.000736	4.5e-05	3.61	0.27	0.282173	5.6e-05
2017-445 - 151	2.58	0.35	0.2216	0.0078	-0.030085	4.51264	0.158838	0.083	0.011	0.34021	1276	96	1289	41	1240	290	concordant	1289	41
2017-445 - 152	1.75	0.19	0.1215	0.0056	0.47417	8.23045	0.379346	0.113	0.012	0.091591	1015	65	739	32	1760	210	discordant			1.46671	0.00026	1.88696	0.00034	0.280223	6.8e-05	0.02938	0.00059	0.000856	2.2e-05	3.49	0.37	0.28228	6.9e-05
2017-445 - 153	2.75	0.62	0.219	0.012	0.014811	4.56621	0.250203	0.094	0.022	0.23705	1300	170	1272	64	1200	460	concordant	1272	64	1.46705	0.00021	1.88681	0.00019	0.280112	6.1e-05	0.0659	0.0036	0.001574	7.5e-05	3.6	0.15	0.282166	6.3e-05		1272	64	5.4	0.6
2017-445 - 154	2.53	0.32	0.2208	0.0079	0.32078	4.52899	0.162043	0.088	0.011	0.10155	1251	90	1284	42	1270	250	concordant	1284	42	1.46708	0.00021	1.88681	0.0003	0.280136	3.3e-05	0.02486	0.00022	0.0006876	6.6e-06	3.61	0.13	0.282186	3.7e-05		1284	42	7.2	0.4
2017-445 - 155	2.67	0.36	0.215	0.01	-0.064663	4.65116	0.216333	0.099	0.014	0.42738	1290	120	1255	55	1450	300	concordant	1255	55	1.46703	0.00023	1.88654	0.00021	0.280118	4e-05	0.0311	0.0025	0.000845	5.7e-05	3.7	0.17	0.282224	4.3e-05		1255	55	7.7	0.4
2017-445 - 156	1.713	0.091	0.1111	0.0031	0.14888	9.0009	0.25115	0.1132	0.0062	0.35882	1008	34	682	18	1820	110	discordant			1.46689	0.00021	1.88677	0.00028	0.280103	4.3e-05	0.0482	0.0059	0.00124	0.00014	3.37	0.23	0.282149	4.5e-05
2017-445 - 157	1.39	0.14	0.0647	0.0069	0.79616	15.4559	1.64832	0.1714	0.0094	0.3342	868	56	403	42	2590	89	discordant			1.46708	0.00019	1.88694	0.00032	0.280124	5.8e-05	0.1082	0.0039	0.002588	8.1e-05	3.21	0.14	0.282169	5.8e-05
2017-445 - 158	2.22	0.18	0.204	0.0045	0.29961	4.90196	0.108132	0.0852	0.0064	-0.025825	1194	56	1196	24	1330	160	concordant	1196	24	1.46676	0.00023	1.88704	0.00026	0.280149	7.5e-05	0.141	0.012	0.00321	0.00027	3.05	0.21	0.282229	7e-05		1196	24	4.7	0.7
2017-445 - 159	3.61	0.41	0.264	0.012	0.28887	3.78788	0.172176	0.101	0.012	0.024603	1585	86	1505	63	1630	210	concordant	1505	63
2017-445 - 160	5.2	1.1	0.242	0.02	0.097616	4.13223	0.341507	0.151	0.032	0.33273	1810	180	1390	100	2200	410	discordant			1.46695	0.00016	1.88666	0.00019	0.280009	4.7e-05	0.02631	0.00025	0.0007646	4.8e-06	4.04	0.16	0.282081	5.3e-05
2017-445 - 161	2.5	0.69	0.214	0.016	0.27296	4.6729	0.349376	0.083	0.022	0.064227	1170	250	1246	85	750	590	concordant	1246	85	1.46698	0.00019	1.88681	0.0003	0.280149	4.9e-05	0.02071	0.0001	0.0005959	2.7e-06	2.85	0.16	0.282212	6.2e-05		1246	85	7.3	0.6
2017-445 - 162	2.28	0.39	0.2242	0.0089	0.10488	4.4603	0.177059	0.072	0.012	0.18436	1160	120	1312	50	810	350	discordant			1.46714	0.00021	1.88663	0.00027	0.28017	4.8e-05	0.0199	0.00013	0.0005634	2.8e-06	3.36	0.13	0.282229	5.5e-05
2017-445 - 163	2.6	0.29	0.2162	0.0086	0.28488	4.62535	0.183987	0.088	0.0096	0.1077	1293	79	1260	45	1380	200	concordant	1260	45	1.46695	0.00018	1.88696	0.0003	0.280069	4.6e-05	0.0317	0.0031	0.000887	8.6e-05	4	0.2	0.282136	4.7e-05		1260	45	4.7	0.5
2017-445 - 164	3.78	0.3	0.2578	0.0058	0.21567	3.87898	0.0872694	0.1063	0.0091	0.16517	1576	67	1478	30	1680	150	discordant			1.46706	0.00014	1.8867	0.00016	0.280128	5.4e-05	0.0432	0.0027	0.001134	7.2e-05	3.57	0.16	0.282197	5.8e-05
Troy Quartzite, Arkose Member, McFadden Peak Lookout, 33.907661, -110.962744
2017-446 - 20	1.92	0.98	0.047	0.012	0.026806	21.2766	5.43232	0.54	0.35	0.65801	1220	350	292	76	4100	1700	discordant
2017-446 - 44	4.29	0.57	0.24	0.017	0.12515	4.16667	0.295139	0.127	0.017	0.32948	1640	110	1380	89	1910	270	discordant			1.46675	0.00025	1.88685	0.00038	0.279788	8.9e-05	0.0386	0.003	0.001229	9.6e-05	2.06	0.19	0.28164	0.0001
2017-446 - 71	3.69	0.49	0.1765	0.0061	0.35969	5.66572	0.195813	0.148	0.019	-0.080661	1530	120	1047	33	2220	260	discordant			1.46687	0.00017	1.88661	0.00021	0.279679	5.6e-05	0.0581	0.0024	0.001634	5.5e-05	3.55	0.26	0.281668	6.1e-05
2017-446 - 76	3.77	0.35	0.244	0.013	0.34015	4.09836	0.218355	0.113	0.01	0.30634	1586	68	1405	70	1820	160	discordant			1.46686	0.0002	1.88666	0.00016	0.279629	4.4e-05	0.02784	0.00034	0.000843	2.3e-05	3.76	0.23	0.281608	5.3e-05
2017-446 - 82	2.44	0.23	0.1162	0.0091	0.59359	8.60585	0.673952	0.154	0.011	-0.012299	1258	67	707	52	2370	120	discordant			1.46686	0.00022	1.88661	0.00029	0.279598	6.8e-05	0.0738	0.0025	0.001763	5.1e-05	3.2	0.17	0.281578	6.9e-05
2017-446 - 88	3.99	0.42	0.264	0.013	0.28695	3.78788	0.186524	0.106	0.011	0.14781	1632	86	1518	62	1740	190	discordant			1.46685	0.00021	1.88666	0.00019	0.279784	4.9e-05	0.01568	0.00049	0.000472	2.1e-05	4.2	0.31	0.281734	5.5e-05
2017-446 - 91	2.67	0.35	0.238	0.018	0.022356	4.20168	0.317774	0.085	0.013	0.37902	1324	93	1369	96	1320	290	concordant	1369	96	1.46714	0.00015	1.88689	0.00023	0.280016	5.2e-05	0.03102	0.0005	0.00089	1.1e-05	3.83	0.14	0.281967	5.4e-05		1369	96	1.1	0.5
2017-446 - 93	4.49	0.42	0.337	0.017	0.0084589	2.96736	0.149689	0.102	0.011	0.33195	1747	84	1868	79	1590	210	discordant			1.46707	0.00019	1.8867	0.00026	0.279898	4.7e-05	0.0252	0.00092	0.0007	2.3e-05	3.37	0.15	0.281887	4.9e-05
2017-446 - 94	3.28	0.39	0.188	0.012	0.56959	5.31915	0.33952	0.122	0.011	0.023205	1470	93	1118	66	2040	160	discordant			1.46685	0.00017	1.88653	0.0002	0.279782	5.2e-05	0.04007	0.00051	0.001057	1.7e-05	3.25	0.16	0.28178	5.8e-05
2017-446 - 95	1.37	0.43	0.0851	0.0099	0.024523	11.7509	1.36702	0.132	0.038	0.2938	770	200	525	59	1570	750	discordant
2017-446 - 96	2.59	0.54	0.223	0.014	0.13449	4.4843	0.281526	0.082	0.018	0.25363	1230	170	1292	73	1010	450	concordant	1292	73	1.46721	0.00023	1.88644	0.00031	0.28002	0.0001	0.00672	0.00036	0.0002382	7.4e-06	1.523	0.025	0.28191	0.00011		1292	73	-2.1	1.1
2017-446 - 104	3.8	0.34	0.26	0.021	0.75298	3.84615	0.310651	0.1141	0.0053	0.10319	1575	73	1480	110	1852	88	concordant	1480	110
2017-446 - 107	26.8	8.8	0.42	0.11	0.51106	2.38095	0.623583	0.43	0.15	0.24142	3320	340	2190	470	3930	650	discordant
2017-446 - 117	27.9	8.4	0.342	0.051	0.39482	2.92398	0.436032	0.53	0.15	0.064771	3260	360	1890	250	4310	530	discordant
2017-446 - 119	2	0.11	0.1127	0.0032	0.17754	8.87311	0.251943	0.1303	0.0078	0.30082	1123	36	688	19	2060	110	discordant
2017-446 - 121	4.9	0.33	0.3288	0.009	-0.13684	3.04136	0.083249	0.108	0.0082	0.51164	1783	61	1838	45	1740	150	concordant	1838	45
2017-446 - 129	2.14	0.75	0.071	0.016	0.07858	14.0845	3.17397	0.46	0.3	0.97743	1200	260	439	97	2600	1300	discordant
2017-446 - 133	15.63	0.66	0.547	0.014	0.4466	1.82815	0.04679	0.2059	0.0079	0.18016	2852	41	2818	62	2868	65	concordant	2868	65
2017-446 - 142	1.081	0.035	0.03272	0.00097	0.36977	30.5623	0.906035	0.243	0.0085	0.48012	745	17	207.5	6	3138	54	discordant
2017-446 - 153	5.04	0.38	0.3179	0.0085	0.45621	3.14564	0.0841081	0.1107	0.008	-0.12332	1817	63	1778	42	1840	140	concordant	1778	42
Troy Quartzite, Quartzite Member, McFadden Peak Lookout, 33.910076, -110.965555
2017-447 - 1	3.04	0.2	0.2176	0.0083	0.07346	4.59559	0.175291	0.1013	0.0074	0.36562	1422	56	1268	44	1640	140	discordant			1.46707	0.00016	1.88658	0.00033	0.280175	4.2e-05	0.027	0.0012	0.000766	3.5e-05	3.76	0.18	0.282227	4.7e-05
2017-447 - 2	4.35	0.44	0.312	0.015	0.35832	3.20513	0.154093	0.101	0.01	0.11262	1707	84	1744	71	1610	200	concordant	1744	71	1.46706	0.00019	1.88676	0.00024	0.280018	3.9e-05	0.04346	0.00089	0.001176	2e-05	4.1	0.16	0.282043	4.6e-05		1744	71	11.7	0.5
2017-447 - 3	3.18	0.22	0.2545	0.0086	0.14346	3.92927	0.132777	0.0885	0.0064	0.23465	1454	58	1460	44	1390	150	concordant	1460	44	1.46712	0.00016	1.88679	0.00018	0.279786	4.1e-05	0.0259	0.0011	0.000746	2.4e-05	4.02	0.19	0.281815	4.5e-05		1460	44	-2.2	0.5
2017-447 - 5	2.68	0.18	0.2144	0.0051	0.20198	4.66418	0.110948	0.0906	0.0064	0.20913	1320	49	1252	27	1420	130	discordant			1.46696	0.00016	1.88672	0.00023	0.28015	5.9e-05	0.0274	0.0019	0.000752	4.1e-05	3.27	0.16	0.28221	6.9e-05
2017-447 - 7	2.87	0.18	0.1933	0.0072	0.40077	5.17331	0.192694	0.1076	0.0068	0.28699	1378	50	1138	39	1750	110	discordant			1.46689	0.00024	1.88684	0.00024	0.280165	6.7e-05	0.0259	0.0018	0.000753	6.3e-05	3.76	0.21	0.282167	7.5e-05
2017-447 - 8	3.37	0.25	0.2499	0.0075	0.20955	4.0016	0.120096	0.0955	0.0069	0.11671	1491	58	1443	38	1520	130	concordant	1443	38	1.46694	0.0002	1.8865	0.00022	0.279982	5.5e-05	0.0869	0.0063	0.00231	0.00013	3.94	0.21	0.282049	5.6e-05		1443	38	4.2	0.6
2017-447 - 9	2.32	0.25	0.2115	0.0066	-0.23853	4.72813	0.147545	0.0786	0.0099	0.54763	1239	80	1236	35	1120	250	concordant	1236	35	1.46709	0.00015	1.88666	0.00024	0.279993	3.1e-05	0.03954	0.00036	0.0011257	6.7e-06	4.55	0.17	0.282046	3.3e-05		1236	35	0.8	0.3
2017-447 - 10	2.54	0.18	0.1753	0.0055	0.12814	5.70451	0.178978	0.1019	0.0078	0.24973	1278	54	1040	30	1680	150	discordant			1.46721	0.00015	1.88663	0.00022	0.280148	4.1e-05	0.02907	0.00067	0.000791	1.4e-05	4.1	0.17	0.282222	4.6e-05
2017-447 - 11	2.24	0.2	0.1638	0.0047	0.27659	6.10501	0.175174	0.0999	0.008	0.062894	1207	59	982	27	1560	170	discordant			1.46688	0.00018	1.88671	0.00021	0.279991	3.2e-05	0.05322	0.00057	0.001336	1e-05	4.16	0.23	0.282038	4.1e-05
2017-447 - 12	3.66	0.36	0.2542	0.0096	0.30802	3.93391	0.148566	0.107	0.011	0.074185	1589	86	1458	49	1690	190	discordant			1.46687	0.00022	1.88679	0.00027	0.28022	4.9e-05	0.0803	0.0017	0.001964	3e-05	3.16	0.2	0.282239	5.3e-05
2017-447 - 13	3.41	0.26	0.2533	0.0072	0.23979	3.94789	0.112218	0.0985	0.0079	0.17695	1508	63	1461	35	1600	140	concordant	1461	35	1.46725	0.00017	1.88685	0.00025	0.279973	5.9e-05	0.04361	0.00081	0.001169	2.2e-05	3.302	0.059	0.282009	6.7e-05		1461	35	4.3	0.7
2017-447 - 14	3.85	0.24	0.243	0.0089	0.15687	4.11523	0.150722	0.1119	0.0074	0.35532	1616	52	1415	49	1820	120	discordant			1.46716	0.0002	1.88674	0.00023	0.279894	3.4e-05	0.06327	0.00032	0.0017168	7.3e-06	3.78	0.13	0.281945	3.6e-05
2017-447 - 15	2.43	0.43	0.204	0.011	0.18068	4.90196	0.264321	0.085	0.015	0.18089	1210	130	1202	62	1110	370	concordant	1202	62	1.46715	0.00014	1.88674	0.00017	0.280023	3.8e-05	0.0472	0.0012	0.00126	3.4e-05	3.76	0.15	0.282022	4.2e-05		1202	62	-0.9	0.4
2017-447 - 16	2.23	0.17	0.1874	0.0041	0.14006	5.33618	0.116747	0.0845	0.0062	0.15178	1177	52	1107	22	1310	130	discordant			1.46699	0.00015	1.88672	0.00014	0.28008	5.6e-05	0.03441	0.00059	0.000957	1.1e-05	3.82	0.13	0.282116	6.3e-05
2017-447 - 17	3.33	0.26	0.2628	0.008	0.34973	3.80518	0.115835	0.093	0.0069	0.087159	1503	66	1511	43	1500	140	concordant	1511	43	1.46721	0.00016	1.88661	0.00021	0.280157	5.1e-05	0.05005	0.00021	0.001263	6.7e-06	4.05	0.12	0.282188	5e-05		1511	43	11.7	0.5
2017-447 - 18	3.57	0.3	0.238	0.011	0.39666	4.20168	0.194195	0.1032	0.0081	0.10722	1557	64	1375	55	1680	150	discordant			1.46714	0.0002	1.88673	0.00024	0.280028	3.2e-05	0.0355	0.0015	0.001009	3.6e-05	4.41	0.21	0.2821	3.8e-05
2017-447 - 19	2.84	0.49	0.188	0.015	0.15586	5.31915	0.4244	0.104	0.019	0.33991	1310	140	1104	79	1580	370	discordant			1.4671	0.0002	1.88689	0.00025	0.279931	3.7e-05	0.06083	0.00044	0.0017	6.8e-06	3.76	0.16	0.281975	4.1e-05
2017-447 - 20	2.17	0.16	0.1467	0.0069	0.53853	6.81663	0.320619	0.1082	0.0059	0.1445	1159	50	881	39	1790	110	discordant			1.46629	0.00022	1.8863	0.00046	0.28009	8.8e-05	0.01924	0.00057	0.000553	2.1e-05	1.96	0.33	0.28224	9.4e-05
2017-447 - 21	2.44	0.4	0.2156	0.0083	0.23175	4.63822	0.178559	0.08	0.013	-0.04249	1240	120	1265	46	1080	310	concordant	1265	46	1.46701	0.0002	1.88698	0.00024	0.279966	6.7e-05	0.0637	0.0076	0.00163	0.00018	3.61	0.15	0.282026	7.4e-05		1265	46	0.3	0.7
2017-447 - 22	3.62	0.19	0.2285	0.0067	0.15518	4.37637	0.128322	0.1111	0.0059	0.37339	1559	40	1326	35	1835	99	discordant			1.46709	0.00022	1.88685	0.00023	0.28012	5.4e-05	0.03179	0.00016	0.0008705	4e-06	3.72	0.18	0.282191	5.5e-05
2017-447 - 23	3.14	0.2	0.227	0.0067	0.25057	4.40529	0.130024	0.0959	0.0067	0.13471	1439	51	1318	35	1530	130	discordant			1.46683	0.0002	1.88654	0.00022	0.279943	5.3e-05	0.0645	0.0019	0.001778	5.4e-05	3.97	0.31	0.28202	6.2e-05
2017-447 - 24	2.5	0.21	0.1959	0.0064	0.36342	5.10464	0.166767	0.0906	0.0074	-0.078767	1285	61	1152	34	1410	160	discordant			1.4671	0.00019	1.88676	0.00025	0.279985	4.3e-05	0.04122	0.00074	0.00113	1.5e-05	4.44	0.17	0.282038	3.8e-05
2017-447 - 26	1.81	0.35	0.202	0.012	0.18581	4.9505	0.294089	0.065	0.012	0.074137	1050	130	1181	62	660	380	discordant			1.4673	0.00018	1.88673	0.00028	0.280238	4.4e-05	0.03067	0.00035	0.000868	1.9e-05	3.575	0.081	0.282254	4.4e-05
2017-447 - 27	3.41	0.27	0.2441	0.0072	0.047271	4.09668	0.120836	0.1015	0.0099	0.31267	1520	71	1407	37	1630	170	discordant			1.46725	0.00019	1.88688	0.00028	0.28011	3.4e-05	0.02487	0.00072	0.000694	1.7e-05	4.03	0.16	0.282171	3.7e-05
2017-447 - 28	2.69	0.24	0.1934	0.0051	0.2085	5.17063	0.136351	0.0982	0.0085	0.16144	1313	68	1139	28	1580	160	discordant			1.46703	0.00016	1.88674	0.00016	0.280002	4.4e-05	0.03347	0.00087	0.000946	2e-05	4.81	0.13	0.282049	5.1e-05
2017-447 - 29	2.36	0.2	0.2011	0.0053	0.26345	4.97265	0.131054	0.0857	0.0068	0.038925	1242	57	1181	28	1300	150	discordant			1.46711	0.00015	1.88669	0.0002	0.280221	3.8e-05	0.0714	0.0015	0.001939	4.1e-05	3.81	0.17	0.282257	3.9e-05
2017-447 - 31	2.44	0.18	0.1731	0.0075	0.62568	5.77701	0.250304	0.1073	0.0068	-0.26504	1250	56	1028	41	1750	120	discordant
2017-447 - 32	4	0.3	0.2654	0.0074	0.077096	3.7679	0.105058	0.1056	0.0086	0.25467	1623	64	1516	38	1650	170	concordant	1516	38	1.46711	0.00018	1.88671	0.00018	0.279951	3.7e-05	0.0634	0.0037	0.001576	7.9e-05	4.57	0.22	0.281971	4.2e-05		1516	38	3.8	0.4
2017-447 - 33	3.53	0.25	0.2526	0.0079	-0.038302	3.95883	0.123811	0.1005	0.0077	0.32943	1527	60	1450	41	1580	160	discordant			1.46719	0.00013	1.88652	0.00024	0.280007	7.3e-05	0.04034	0.00061	0.001117	1.5e-05	3.513	0.082	0.28204	7.1e-05
2017-447 - 34	3.66	0.44	0.2456	0.0096	-0.050927	4.07166	0.159153	0.106	0.013	0.31259	1545	92	1414	50	1610	240	discordant			1.46713	0.00019	1.88676	0.00023	0.280008	5.7e-05	0.0313	0.001	0.000875	3e-05	3.86	0.16	0.282026	5.9e-05
2017-447 - 35	1.9	0.53	0.19	0.014	0.1084	5.26316	0.387812	0.076	0.022	0.4284	1000	240	1118	75	530	610	concordant	1118	75	1.46698	0.00022	1.88664	0.00022	0.279984	5e-05	0.03181	0.00071	0.001039	1.8e-05	3.37	0.21	0.282011	4.4e-05		1118	75	-3	0.4
2017-447 - 36	2.13	0.25	0.1853	0.0081	0.13533	5.39665	0.235903	0.0795	0.0093	0.27064	1136	83	1094	44	1110	240	concordant	1094	44	1.46707	0.0002	1.88691	0.00035	0.280175	6.4e-05	0.0386	0.002	0.001074	5.2e-05	2.7	0.13	0.282198	6.6e-05		1094	44	3.1	0.7
2017-447 - 37	2.08	0.42	0.182	0.014	0.23533	5.49451	0.422654	0.084	0.016	0.11869	1140	140	1073	78	1090	390	concordant	1073	78	1.46704	0.00017	1.88673	0.00022	0.280055	3.8e-05	0.02529	0.00076	0.000686	1.6e-05	3.96	0.12	0.282111	3.8e-05		1073	78	-0.1	0.4
2017-447 - 38	2.24	0.38	0.203	0.01	0.14371	4.92611	0.242665	0.079	0.014	0.045147	1180	130	1188	56	980	380	concordant	1188	56	1.46717	0.00016	1.8867	0.00021	0.280143	4.8e-05	0.0358	0.002	0.00098	5.3e-05	3.61	0.18	0.282174	5.2e-05		1188	56	4.4	0.5
2017-447 - 39	2.37	0.5	0.206	0.012	0.11842	4.85437	0.282779	0.078	0.017	0.20862	1250	140	1205	63	1000	430	concordant	1205	63	1.46711	0.00019	1.88679	0.00022	0.280145	4.9e-05	0.04045	0.00033	0.001092	8.4e-06	3.58	0.15	0.282204	5.4e-05		1205	63	5.7	0.5
2017-447 - 40	2.44	0.5	0.204	0.015	0.22401	4.90196	0.360438	0.084	0.017	0.11702	1200	160	1191	80	970	430	concordant	1191	80	1.46695	0.00018	1.88665	0.00024	0.280147	5.7e-05	0.02375	0.00027	0.0006637	9.2e-06	3.64	0.15	0.282218	5.5e-05		1191	80	6.3	0.6
2017-447 - 41	2.5	0.59	0.189	0.013	0.069157	5.29101	0.363932	0.088	0.021	0.35359	1200	190	1149	74	870	550	concordant	1149	74	1.46717	0.00018	1.88675	0.00025	0.280143	4.7e-05	0.02457	0.00011	0.0006936	2e-06	3.55	0.12	0.282194	5.3e-05		1149	74	4.5	0.5
2017-447 - 42	2.74	0.23	0.1979	0.0069	0.15046	5.05306	0.17618	0.095	0.0078	0.25456	1340	58	1163	37	1560	150	discordant			1.46708	0.00015	1.8869	0.00022	0.280129	4.8e-05	0.01963	0.00042	0.0005603	9e-06	3.73	0.17	0.282162	5.5e-05
2017-447 - 43	1.97	0.23	0.1892	0.0077	0.14636	5.28541	0.215104	0.0784	0.0094	0.16293	1126	79	1116	42	1170	230	concordant	1116	42	1.46723	0.00018	1.88689	0.00016	0.279983	3.3e-05	0.06585	0.00092	0.001726	2e-05	4.31	0.14	0.282	3.7e-05		1116	42	-3.9	0.4
2017-447 - 44	2.11	0.52	0.209	0.012	0.28772	4.78469	0.274719	0.083	0.019	0.12589	1100	210	1220	66	640	540	concordant	1220	66	1.46708	0.00016	1.88686	0.00021	0.280144	5.1e-05	0.02472	0.00065	0.000703	1.6e-05	3.95	0.15	0.282182	5.5e-05		1220	66	5.6	0.6
2017-447 - 45	2.72	0.4	0.206	0.011	0.082615	4.85437	0.259214	0.092	0.013	0.14898	1270	110	1206	59	1300	310	concordant	1206	59	1.46711	0.00019	1.88654	0.00017	0.280108	5.2e-05	0.01929	0.00096	0.000548	2.4e-05	3.63	0.12	0.28216	6e-05		1206	59	4.6	0.6
2017-447 - 46	3.18	0.35	0.24	0.0081	0.11232	4.16667	0.140625	0.095	0.011	0.30035	1432	91	1385	42	1380	250	concordant	1385	42	1.46717	0.00025	1.88676	0.00019	0.280212	3.2e-05	0.02596	0.00091	0.000732	2.1e-05	3.24	0.12	0.282264	3.5e-05		1385	42	12.1	0.4
2017-447 - 47	1.81	0.15	0.1104	0.0061	0.56218	9.05797	0.500486	0.1174	0.0072	0.11154	1064	50	674	35	1910	120	discordant			1.46717	0.00013	1.88669	0.00024	0.280024	3.8e-05	0.03833	0.00049	0.001079	1.3e-05	4.1	0.19	0.282061	3.7e-05
2017-447 - 48	2.54	0.34	0.2191	0.0072	0.22615	4.56413	0.149985	0.081	0.01	0.048078	1262	97	1276	38	1130	260	concordant	1276	38	1.46675	0.00026	1.88669	0.00022	0.280222	7.5e-05	0.1425	0.0044	0.00332	0.00016	2.98	0.16	0.282258	6.5e-05		1276	38	7.3	0.7
2017-447 - 49	2.56	0.35	0.2117	0.0094	-0.085379	4.72367	0.209742	0.088	0.013	0.26266	1270	100	1236	50	1180	330	concordant	1236	50	1.46706	0.00018	1.88686	0.00025	0.280112	5.4e-05	0.0358	0.0021	0.000968	4.9e-05	3.7	0.2	0.282188	5.2e-05		1236	50	5.9	0.5
2017-447 - 51	3.04	0.23	0.2204	0.0064	0.15901	4.53721	0.131752	0.0979	0.0075	0.2313	1418	58	1283	34	1530	150	discordant			1.46706	0.00019	1.88689	0.00026	0.280103	5.9e-05	0.03536	0.0002	0.000966	1.5e-05	3.58	0.18	0.282142	5.9e-05
2017-447 - 52	2.48	0.29	0.2089	0.0063	0.035367	4.78698	0.144366	0.0853	0.0095	0.16597	1289	88	1222	34	1250	240	concordant	1222	34	1.46714	0.00015	1.88674	0.00022	0.280035	5.1e-05	0.04922	0.0007	0.001345	2.1e-05	4.16	0.2	0.282094	5.5e-05		1222	34	2	0.6
2017-447 - 53	1.88	0.43	0.156	0.011	-0.046759	6.41026	0.452005	0.092	0.023	0.13252	1070	140	932	64	930	500	concordant	932	64	1.46706	0.00016	1.88679	0.00019	0.280168	3.4e-05	0.02615	0.0008	0.000724	2.1e-05	4.08	0.16	0.282234	3.8e-05		932	64	1.1	0.4
2017-447 - 54	2.27	0.27	0.184	0.0093	-0.0061818	5.43478	0.274693	0.09	0.01	0.33009	1217	75	1087	51	1380	220	discordant			1.46722	0.00019	1.88691	0.0002	0.28014	4.5e-05	0.02127	0.00025	0.0005757	5.5e-06	3.58	0.15	0.282193	4.9e-05
2017-447 - 55	2.54	0.24	0.2011	0.0077	0.089438	4.97265	0.1904	0.0898	0.0083	0.34345	1286	61	1180	42	1390	170	discordant			1.4672	0.00019	1.88673	0.00031	0.280161	4.4e-05	0.0428	0.0011	0.001145	2.3e-05	3.47	0.14	0.282218	4.9e-05
2017-447 - 56	1.19	0.1	0.0898	0.0067	0.57842	11.1359	0.830849	0.0959	0.0068	0.29262	799	49	553	40	1510	140	discordant			1.467	0.00013	1.88685	0.00017	0.28015	4.5e-05	0.0541	0.0027	0.001423	7e-05	3.6	0.17	0.282192	4.6e-05
2017-447 - 57	3.22	0.26	0.2041	0.0078	0.29329	4.89956	0.187244	0.1094	0.0085	0.21971	1463	60	1196	42	1770	150	discordant			1.46684	0.00024	1.88629	0.00022	0.28009	6.4e-05	0.183	0.016	0.00416	0.00035	2.82	0.15	0.28215	6.9e-05
2017-447 - 58	2.3	0.53	0.183	0.012	-0.061735	5.46448	0.358327	0.089	0.022	0.49599	1220	170	1093	70	1020	570	concordant	1093	70	1.46661	0.00025	1.88689	0.00036	0.280113	6.9e-05	0.063	0.0035	0.0018	0.00011	2.76	0.36	0.282099	6.2e-05		1093	70	-0.9	0.6
2017-447 - 60	2.01	0.21	0.158	0.012	0.51427	6.32911	0.480692	0.0939	0.0084	0.020756	1116	75	953	65	1470	170	discordant
2017-447 - 61	2.79	0.27	0.221	0.013	0.23909	4.52489	0.26617	0.092	0.0099	0.28955	1343	69	1282	71	1480	200	concordant	1282	71	1.46691	0.0002	1.88681	0.0002	0.280101	5.6e-05	0.097	0.013	0.00244	0.00031	3.28	0.29	0.28214	6.2e-05		1282	71	4	0.6
2017-447 - 62	2.38	0.48	0.204	0.01	0.074798	4.90196	0.240292	0.085	0.017	0.37456	1220	150	1193	54	1030	380	concordant	1193	54	1.4671	0.00017	1.88669	0.0002	0.280013	3.6e-05	0.03792	0.00091	0.001018	1.8e-05	4.14	0.17	0.282095	4.4e-05		1193	54	1.7	0.4
2017-447 - 63	2.52	0.26	0.1986	0.0062	0.19705	5.03525	0.157193	0.0905	0.0093	0.083978	1271	77	1167	33	1390	230	discordant			1.46711	0.00019	1.88679	0.00015	0.280112	6.5e-05	0.03016	0.00087	0.000826	2.2e-05	3.92	0.16	0.282179	7.3e-05
2017-447 - 64	2.5	0.35	0.2068	0.0084	0.028009	4.83559	0.196417	0.086	0.013	0.21258	1230	100	1210	45	1100	300	concordant	1210	45	1.46711	0.00014	1.88666	0.00022	0.280142	3.9e-05	0.03325	0.00041	0.000903	1.5e-05	4.52	0.12	0.282184	4.7e-05		1210	45	5.3	0.5
2017-447 - 65	0.974	0.08	0.0638	0.0035	0.42455	15.674	0.859858	0.1084	0.0085	0.29355	688	40	401	21	1750	140	discordant			1.46725	0.00019	1.8869	0.00023	0.280113	6.1e-05	0.05828	0.00039	0.0015748	7.5e-06	3.245	0.095	0.282186	6.9e-05
2017-447 - 66	1.94	0.38	0.1834	0.008	0.28706	5.45256	0.237844	0.072	0.013	0.049983	1040	140	1084	44	710	400	concordant	1084	44	1.46688	0.00023	1.88685	0.00026	0.280243	7.1e-05	0.218	0.01	0.00475	0.00023	3.37	0.2	0.282295	6.3e-05		1084	44	3.7	0.6
2017-447 - 67	2.44	0.16	0.1613	0.0051	0.33974	6.19963	0.19602	0.1078	0.0071	0.19331	1259	46	964	28	1750	120	discordant			1.46704	0.0002	1.88671	0.00028	0.280081	4.7e-05	0.02918	0.00039	0.0007872	9.1e-06	3.57	0.11	0.282115	5.2e-05
2017-447 - 68	2.16	0.31	0.176	0.011	0.25196	5.68182	0.355114	0.087	0.013	0.1799	1160	110	1039	62	1200	310	discordant			1.46699	0.00014	1.88674	0.00028	0.280112	4.2e-05	0.0838	0.0058	0.00204	0.00013	3.58	0.28	0.282176	4.7e-05
2017-447 - 69	3.41	0.57	0.219	0.014	0.21432	4.56621	0.291904	0.11	0.018	0.18941	1480	130	1273	71	1780	270	discordant			1.46682	0.00022	1.88669	0.0003	0.280224	7.8e-05	0.0566	0.00094	0.00172	6.3e-05	2.93	0.24	0.282267	8.2e-05
2017-447 - 70	4.55	0.23	0.2872	0.0066	0.27173	3.48189	0.0800157	0.1132	0.0065	0.28094	1741	41	1627	33	1830	110	discordant
2017-447 - 71	2.67	0.34	0.224	0.011	0.35748	4.46429	0.219228	0.092	0.011	0.039102	1340	100	1298	60	1340	240	concordant	1298	60	1.46691	0.00021	1.88669	0.00023	0.279789	4.8e-05	0.0233	0.00062	0.000632	1.2e-05	3.91	0.3	0.281873	5.3e-05		1298	60	-3.6	0.5
2017-447 - 72	3.43	0.3	0.2381	0.0084	0.40908	4.19992	0.14817	0.1017	0.0083	-0.0032811	1498	73	1375	44	1650	160	discordant			1.4669	0.00022	1.8869	0.00026	0.27996	4.5e-05	0.03381	0.00097	0.000913	1.9e-05	3.36	0.22	0.282022	5e-05
2017-447 - 73	2.48	0.25	0.2002	0.0088	0.15741	4.995	0.219561	0.0877	0.0089	0.20887	1280	70	1175	47	1320	220	discordant			1.46723	0.00014	1.88676	0.0002	0.279959	5.1e-05	0.03576	0.00034	0.0010122	4.7e-06	4.14	0.17	0.282049	5.4e-05
2017-447 - 74	2.58	0.27	0.2187	0.0074	0.17851	4.57247	0.154716	0.0839	0.0086	0.10455	1275	83	1274	39	1300	210	concordant	1274	39	1.46712	0.00018	1.88683	0.00019	0.280101	4.8e-05	0.05665	0.00079	0.001501	2.5e-05	3.38	0.2	0.282173	4.7e-05		1274	39	5.8	0.5
2017-447 - 76	4.01	0.5	0.283	0.014	0.030858	3.53357	0.174806	0.102	0.014	0.24246	1640	100	1600	70	1640	280	concordant	1600	70	1.4667	0.0003	1.88696	0.00028	0.280258	7.6e-05	0.2064	0.0046	0.00495	0.00017	1.91	0.17	0.282248	6.7e-05		1600	70	11.8	0.7
2017-447 - 77	2.17	0.31	0.1678	0.0085	0.2045	5.95948	0.30188	0.085	0.015	0.13822	1130	110	998	47	1220	350	discordant			1.4671	0.00018	1.88685	0.0002	0.2799	3.8e-05	0.0307	0.0028	0.0009	7.3e-05	4.1	0.22	0.281967	4.2e-05
2017-447 - 78	2.06	0.11	0.1336	0.0033	0.32975	7.48503	0.184885	0.1086	0.0053	0.14112	1127	36	808	19	1780	90	discordant			1.46703	0.00021	1.88675	0.00023	0.280146	4.8e-05	0.03364	0.00095	0.000961	1.5e-05	4.28	0.16	0.282195	4.6e-05
2017-447 - 80	2.21	0.47	0.216	0.014	0.32888	4.62963	0.300069	0.074	0.015	0.086367	1250	150	1259	75	910	410	concordant	1259	75
2017-447 - 81	2.58	0.41	0.195	0.011	0.3552	5.12821	0.289283	0.088	0.012	-0.00265	1300	110	1149	60	1450	270	discordant			1.46701	0.00018	1.88693	0.00024	0.280154	4.6e-05	0.01698	0.00052	0.000492	1.2e-05	3.34	0.24	0.282213	5.1e-05
2017-447 - 82	2.03	0.43	0.203	0.011	-0.21653	4.92611	0.266932	0.074	0.017	0.48517	1200	140	1188	61	650	490	concordant	1188	61	1.46718	0.00016	1.88681	0.00015	0.280158	3.4e-05	0.03506	0.00053	0.00096	2e-05	3.64	0.15	0.282203	3.4e-05		1188	61	5.4	0.3
2017-447 - 84	2.95	0.32	0.249	0.0089	0.15847	4.01606	0.143546	0.0885	0.0095	0.22246	1397	84	1431	46	1260	230	concordant	1431	46
2017-447 - 85	3.65	0.51	0.201	0.0086	0.37028	4.97512	0.212866	0.124	0.015	-0.077109	1550	110	1179	46	2040	230	discordant			1.46717	0.00016	1.88674	0.0002	0.280064	4.2e-05	0.0452	0.0018	0.001262	5.3e-05	4.15	0.15	0.282126	4.4e-05
2017-447 - 86	3.05	0.3	0.205	0.01	0.38649	4.87805	0.237954	0.101	0.011	-0.14579	1388	81	1201	56	1700	190	discordant			1.4671	0.00019	1.88697	0.00026	0.280119	6.7e-05	0.0414	0.0033	0.00109	8.8e-05	3	0.15	0.282186	6.9e-05
2017-447 - 87	3.09	0.24	0.2387	0.0073	0.023544	4.18936	0.12812	0.0951	0.0062	0.30406	1436	54	1385	39	1480	120	concordant	1385	39	1.46676	0.00048	1.88693	0.00023	0.280078	6e-05	0.0554	0.0025	0.00156	0.00011	4.22	0.22	0.282099	6.2e-05		1385	39	5.5	0.6
2017-447 - 88	0.627	0.044	0.02088	0.00067	0.25949	47.8927	1.53679	0.213	0.014	0.3356	496	26	133.2	4.2	2900	110	discordant			1.46706	0.00022	1.8866	0.00018	0.280031	5.9e-05	0.05626	0.00066	0.001557	1.7e-05	3.65	0.18	0.282086	6.5e-05
2017-447 - 89	3.04	0.32	0.2073	0.0094	0.35249	4.82393	0.218741	0.1059	0.0092	0.14982	1452	73	1212	50	1760	160	discordant			1.46671	0.0003	1.88636	0.00023	0.280157	9.6e-05	0.7697	0.0051	0.017	0.00014	2.84	0.18	0.282229	8.7e-05
2017-447 - 90	3.11	0.42	0.234	0.011	0.052209	4.2735	0.200891	0.093	0.012	0.11477	1450	100	1351	56	1500	260	concordant	1351	56	1.46709	0.00016	1.88661	0.00021	0.280058	3.8e-05	0.03876	0.00034	0.001108	1.7e-05	4.2	0.11	0.282063	4.7e-05		1351	56	3.9	0.5
2017-447 - 91	1.83	0.42	0.203	0.013	0.081779	4.92611	0.315465	0.068	0.015	0.25706	1130	140	1189	68	800	410	concordant	1189	68	1.46699	0.00012	1.88684	0.00022	0.279983	4.3e-05	0.02248	0.00037	0.00065	1.3e-05	3.92	0.28	0.282058	4.5e-05		1189	68	0.6	0.5
2017-447 - 92	3.03	0.33	0.2191	0.0086	-0.17209	4.56413	0.179149	0.098	0.012	0.38977	1408	84	1275	45	1520	250	discordant			1.46711	0.00017	1.88689	0.00022	0.280109	4.9e-05	0.04035	0.00062	0.001084	1.5e-05	3.25	0.13	0.282153	5e-05
2017-447 - 93	2.19	0.17	0.145	0.011	0.58014	6.89655	0.523187	0.1157	0.0078	0.43366	1192	57	869	63	1850	130	discordant			1.46708	0.00018	1.88673	0.00019	0.280044	4.6e-05	0.02619	0.00024	0.0007418	6.3e-06	4.08	0.21	0.282098	4.8e-05
2017-447 - 94	2.2	0.54	0.177	0.016	0.096991	5.64972	0.510709	0.097	0.026	0.14893	1120	220	1055	86	920	610	concordant	1055	86	1.46691	0.00018	1.88659	0.00015	0.280074	3.8e-05	0.0702	0.0079	0.00172	0.00018	4.51	0.24	0.28209	4.1e-05		1055	86	-2	0.4
2017-447 - 95	1.83	0.43	0.165	0.015	0.37066	6.06061	0.550964	0.075	0.017	0.16558	920	180	979	81	720	520	concordant	979	81	1.46695	0.00016	1.88681	0.00021	0.280123	4.1e-05	0.02338	0.00034	0.0006483	8.4e-06	3.34	0.15	0.282182	4.7e-05		979	81	0.3	0.5
2017-447 - 96	2.02	0.25	0.1641	0.0053	0.17165	6.09384	0.196815	0.089	0.011	0.18709	1096	86	979	29	1270	250	discordant			1.46717	0.00014	1.88646	0.00033	0.280144	6.5e-05	0.03345	0.0008	0.000894	2.2e-05	3.32	0.083	0.282177	7.4e-05
2017-447 - 97	2.76	0.27	0.2118	0.0097	0.1928	4.72143	0.216232	0.0894	0.0094	0.29414	1316	76	1244	50	1440	190	concordant	1244	50	1.46707	0.00013	1.88683	0.00022	0.280175	6e-05	0.06936	0.00073	0.00172	2e-05	3.54	0.17	0.282219	6.7e-05		1244	50	6.6	0.7
2017-447 - 98	2.15	0.33	0.2108	0.0072	0.27088	4.74383	0.162028	0.0691	0.0099	0.0023075	1140	110	1238	37	820	320	concordant	1238	37	1.46706	0.00019	1.88693	0.0003	0.28014	4.7e-05	0.02463	0.00062	0.000678	1.7e-05	3.78	0.18	0.282151	6.1e-05		1238	37	4.9	0.6
2017-447 - 99	2.5	0.21	0.1886	0.0086	0.084676	5.30223	0.241777	0.0936	0.0092	0.4276	1254	64	1112	47	1470	200	discordant			1.46719	0.00023	1.88703	0.00022	0.280094	5.3e-05	0.0385	0.0013	0.001056	3.2e-05	3.35	0.12	0.28214	5.5e-05
2017-447 - 101	2.62	0.28	0.1955	0.0071	0.24776	5.11509	0.185765	0.095	0.01	0.12392	1295	84	1150	38	1460	220	discordant			1.46705	0.00015	1.8868	0.00018	0.280146	3.6e-05	0.03261	0.00025	0.0008913	9.7e-06	4.05	0.2	0.282196	4.2e-05
2017-447 - 102	3.4	0.19	0.2423	0.0069	0.22482	4.12711	0.117528	0.1016	0.0054	0.28353	1503	42	1398	36	1640	110	discordant			1.46704	0.0002	1.88672	0.00023	0.280171	6.9e-05	0.0672	0.0012	0.001796	4.2e-05	3.16	0.15	0.282216	7.4e-05
2017-447 - 103	2.35	0.24	0.2021	0.0059	0.32543	4.94805	0.144451	0.0834	0.008	-0.029371	1213	82	1186	32	1170	220	concordant	1186	32	1.4671	0.00014	1.8867	0.00018	0.279985	4.8e-05	0.03545	0.00032	0.0009948	5.6e-06	4.56	0.14	0.282046	5.5e-05		1186	32	-0.2	0.6
2017-447 - 104	1.67	0.17	0.1322	0.0065	0.39985	7.5643	0.371921	0.0889	0.0087	0.2299	987	63	799	37	1350	170	discordant			1.46704	0.00016	1.88689	0.00019	0.280174	4e-05	0.05018	0.0009	0.001329	2.2e-05	3.339	0.071	0.282195	4.7e-05
2017-447 - 105	2.37	0.29	0.192	0.01	0.084161	5.20833	0.271267	0.085	0.01	0.31442	1206	89	1132	54	1280	250	concordant	1132	54	1.46706	0.00017	1.8867	0.00024	0.280092	4.1e-05	0.0591	0.0047	0.001379	9.5e-05	3.93	0.24	0.282126	4.8e-05		1132	54	1.2	0.5
2017-447 - 106	2.29	0.29	0.2098	0.0096	-0.066058	4.76644	0.218102	0.08	0.011	0.40428	1197	89	1226	51	1090	290	concordant	1226	51	1.46723	0.00013	1.88676	0.00023	0.28013	3.6e-05	0.03302	0.00018	0.0008482	4e-06	3.863	0.089	0.282163	4.3e-05		1226	51	4.9	0.4
2017-447 - 107	2.44	0.36	0.184	0.013	0.41264	5.43478	0.383979	0.093	0.013	0.085343	1270	100	1095	69	1540	250	discordant			1.4671	0.00019	1.88686	0.00024	0.280184	5.3e-05	0.02589	0.00074	0.000725	1.4e-05	3.63	0.13	0.282255	5.4e-05
2017-447 - 108	3.79	0.32	0.261	0.011	0.16233	3.83142	0.161477	0.1038	0.0093	0.2673	1617	68	1493	55	1680	190	discordant			1.46723	0.00015	1.88677	0.00017	0.280145	3.8e-05	0.03102	0.0005	0.00084	1.1e-05	3.77	0.11	0.282185	4.9e-05
2017-447 - 110	1.9	0.2	0.1631	0.0091	0.22769	6.13121	0.342085	0.0821	0.009	0.3586	1088	73	980	49	1180	240	discordant			1.46716	0.00015	1.88675	0.00025	0.280029	4.3e-05	0.0375	0.002	0.001062	5e-05	4.12	0.21	0.28209	4.5e-05
2017-447 - 111	2.32	0.29	0.1852	0.0081	0.17928	5.39957	0.236158	0.089	0.011	0.11587	1230	88	1094	44	1440	250	discordant			1.46724	0.00017	1.88708	0.00023	0.280212	6.7e-05	0.0727	0.003	0.001866	7.9e-05	3.06	0.16	0.282232	6.8e-05
2017-447 - 112	2.89	0.33	0.256	0.011	0.21643	3.90625	0.167847	0.0809	0.0098	0.16395	1338	89	1467	58	1080	260	discordant			1.46718	0.00017	1.88645	0.00019	0.280167	4.7e-05	0.03539	0.0007	0.000942	1.1e-05	3.58	0.1	0.282235	5.3e-05
2017-447 - 113	2.37	0.35	0.202	0.01	0.2711	4.9505	0.245074	0.085	0.013	0.3219	1210	110	1202	56	1170	320	concordant	1202	56	1.46724	0.00018	1.88682	0.0002	0.280023	4.5e-05	0.02345	0.00048	0.00068	1e-05	4.28	0.15	0.282088	5.2e-05		1202	56	1.9	0.5
2017-447 - 114	2.52	0.23	0.2006	0.0071	0.10943	4.98505	0.17644	0.0935	0.0083	0.168	1297	68	1177	38	1480	170	discordant			1.46707	0.00019	1.88676	0.00023	0.280138	4.8e-05	0.0431	0.0015	0.001149	4.7e-05	3.87	0.15	0.28221	4.8e-05
2017-447 - 115	3.52	0.31	0.2536	0.0072	-0.1512	3.94322	0.111953	0.0991	0.0095	0.41543	1536	63	1456	37	1580	160	discordant			1.46709	0.00021	1.8865	0.00019	0.280014	4.4e-05	0.0351	0.0033	0.000948	8.4e-05	4.23	0.13	0.282096	4.7e-05
2017-447 - 116	2.23	0.23	0.1978	0.0085	0.13715	5.05561	0.217253	0.081	0.0095	0.26715	1185	81	1162	46	1120	250	concordant	1162	46	1.46707	0.00015	1.8866	0.0002	0.279976	3.1e-05	0.03591	0.00056	0.001018	1.3e-05	4.36	0.17	0.282055	3.3e-05		1162	46	-0.4	0.3
2017-447 - 117	3.7	0.29	0.2636	0.0075	0.12172	3.79363	0.107937	0.1	0.0076	0.16449	1571	66	1507	38	1660	140	discordant			1.46702	0.00022	1.88685	0.0002	0.280151	5.2e-05	0.0589	0.0022	0.001498	4e-05	3.73	0.18	0.282197	5.8e-05
2017-447 - 118	2.58	0.28	0.2105	0.0066	0.088378	4.75059	0.14895	0.0883	0.0097	0.36757	1274	80	1231	35	1330	230	concordant	1231	35	1.46711	0.00015	1.88692	0.00017	0.280015	3.5e-05	0.0347	0.00084	0.000988	2.1e-05	4.56	0.23	0.282088	4.1e-05		1231	35	2.3	0.4
2017-447 - 119	2.98	0.22	0.2342	0.0063	0.15121	4.26985	0.11486	0.0912	0.0067	0.19317	1385	56	1356	33	1450	140	concordant	1356	33	1.4672	0.00018	1.88705	0.00018	0.280121	5.4e-05	0.038774	8.8e-05	0.0010606	5.2e-06	3.84	0.16	0.282185	5.8e-05		1356	33	8.4	0.6
2017-447 - 120	2.03	0.56	0.218	0.013	0.20356	4.58716	0.273546	0.061	0.017	0.059585	1080	210	1268	70	440	550	concordant	1268	70	1.46704	0.00017	1.88686	0.00029	0.280037	4.3e-05	0.0439	0.0013	0.001234	4.7e-05	4.53	0.19	0.282095	4.2e-05		1268	70	3.1	0.4
2017-447 - 121	3.38	0.24	0.2328	0.0065	0.38348	4.29553	0.119935	0.0991	0.0061	0.024928	1493	55	1348	34	1610	110	discordant			1.46711	0.00016	1.88671	0.00021	0.280144	5e-05	0.02294	0.00024	0.0006391	8.5e-06	3.56	0.17	0.282227	5.6e-05
2017-447 - 122	3.77	0.29	0.2624	0.0083	0.20576	3.81098	0.120545	0.1032	0.0082	0.23836	1594	62	1508	44	1640	150	concordant	1508	44	1.46723	0.00021	1.8869	0.0002	0.280004	6.1e-05	0.04005	0.00053	0.001112	1.4e-05	4.14	0.1	0.282028	6.4e-05		1508	44	6.1	0.6
2017-447 - 123	2.53	0.39	0.1965	0.0077	0.28884	5.08906	0.199419	0.093	0.014	0.027844	1250	130	1155	42	1410	320	concordant	1155	42	1.46702	0.00021	1.88639	0.00018	0.27999	5.2e-05	0.03473	0.00024	0.000976	2.2e-05	4.23	0.16	0.282055	5.7e-05		1155	42	-0.5	0.6
2017-447 - 124	2.17	0.2	0.1745	0.0072	0.40456	5.73066	0.236451	0.0872	0.0074	0.081502	1159	63	1035	39	1370	170	discordant			1.46697	0.0002	1.88674	0.00027	0.280097	4.9e-05	0.0425	0.0016	0.001156	4e-05	3.07	0.21	0.28218	5.4e-05
2017-447 - 126	2.31	0.27	0.1953	0.0059	0.042396	5.12033	0.154685	0.0841	0.0098	0.2583	1219	83	1149	32	1280	230	concordant	1149	32	1.46701	0.00016	1.88664	0.00025	0.280147	6.3e-05	0.0462	0.0053	0.00122	0.0001	3.3	0.15	0.282181	6.7e-05		1149	32	3.6	0.7
2017-447 - 127	2.2	0.66	0.179	0.014	0.0096888	5.58659	0.43694	0.082	0.027	0.22947	970	240	1058	74	660	640	concordant	1058	74	1.4671	0.00016	1.88698	0.00023	0.280072	4.7e-05	0.0263	0.0011	0.000704	2.4e-05	4.1	0.16	0.282136	5.2e-05		1058	74	0.4	0.5
2017-447 - 128	2.17	0.24	0.2012	0.0087	0.24102	4.97018	0.214913	0.0783	0.0092	0.23005	1180	79	1190	49	1100	220	concordant	1190	49	1.46712	0.00019	1.88666	0.00021	0.280087	4.5e-05	0.02206	0.0005	0.000609	1e-05	3.49	0.12	0.282137	6e-05		1190	49	3.4	0.6
2017-447 - 129	2.56	0.22	0.204	0.0066	0.046704	4.90196	0.158593	0.0905	0.008	0.41066	1280	60	1196	35	1440	170	discordant			1.4671	0.00021	1.88671	0.00023	0.280161	6.1e-05	0.073	0.0045	0.002	0.00011	2.882	0.073	0.282188	6.2e-05
2017-447 - 130	3.88	0.38	0.288	0.012	-0.13017	3.47222	0.144676	0.093	0.011	0.46116	1589	82	1638	62	1440	230	concordant	1638	62
2017-447 - 131	1.99	0.37	0.2098	0.0088	0.033221	4.76644	0.199927	0.068	0.013	0.21819	1130	130	1244	47	830	380	concordant	1244	47	1.46691	0.00017	1.88668	0.00025	0.27997	4.6e-05	0.02622	0.00085	0.000771	2.1e-05	3.78	0.15	0.282022	5.6e-05		1244	47	0.4	0.6
2017-447 - 132	2.69	0.35	0.1953	0.0082	0.13806	5.12033	0.214986	0.094	0.013	0.15116	1330	100	1156	43	1470	270	discordant			1.46711	0.00017	1.88682	0.00025	0.280204	4.5e-05	0.04065	0.00087	0.001098	2.3e-05	3.616	0.085	0.282287	3.8e-05
2017-447 - 133	3.4	0.29	0.253	0.0069	0.52266	3.95257	0.107797	0.0968	0.0073	-0.21606	1502	69	1453	35	1580	150	concordant	1453	35	1.4671	0.00019	1.8863	0.00022	0.280142	6e-05	0.0643	0.0013	0.001693	3.6e-05	3.15	0.13	0.282217	6.5e-05		1453	35	11	0.7
2017-447 - 134	2.41	0.27	0.185	0.01	0.32618	5.40541	0.292184	0.0921	0.0096	0.14656	1249	83	1090	55	1480	200	discordant			1.46706	0.00018	1.88683	0.00022	0.279974	3.9e-05	0.02977	0.00041	0.000834	1.1e-05	4.71	0.23	0.282024	4.6e-05
2017-447 - 135	1.82	0.48	0.182	0.013	0.14103	5.49451	0.392465	0.076	0.019	0.19099	1080	190	1071	72	650	530	concordant	1071	72	1.46716	0.00023	1.88684	0.00034	0.280119	6.8e-05	0.0371	0.0017	0.000993	4.4e-05	3.32	0.2	0.282159	7.2e-05		1071	72	1.3	0.7
2017-447 - 136	2.68	0.46	0.217	0.015	0.16212	4.6083	0.318546	0.091	0.016	0.14544	1300	130	1260	81	1270	330	concordant	1260	81	1.46722	0.00019	1.88678	0.00029	0.280154	6.8e-05	0.0243	0.0014	0.000656	3.7e-05	3.59	0.14	0.2822	7e-05		1260	81	7.2	0.7
2017-447 - 137	2.67	0.4	0.2058	0.0074	-0.039461	4.85909	0.174719	0.091	0.014	0.30708	1280	120	1205	40	1230	340	concordant	1205	40	1.46726	0.00018	1.88701	0.0002	0.280093	5.8e-05	0.01961	0.0003	0.000553	5.6e-06	3.7	0.13	0.282147	6.6e-05		1205	40	4.1	0.7
2017-447 - 138	1.98	0.19	0.161	0.012	0.4631	6.21118	0.462945	0.0874	0.0082	0.40019	1099	63	958	68	1340	190	discordant			1.46696	0.0002	1.88679	0.00028	0.280218	4.8e-05	0.05735	0.00095	0.001545	2.3e-05	3.02	0.15	0.282269	5.4e-05
2017-447 - 139	2.52	0.28	0.1967	0.0071	0.034247	5.08388	0.183506	0.091	0.01	0.34633	1274	73	1156	38	1380	200	discordant			1.46718	0.00016	1.88692	0.00022	0.280117	4.7e-05	0.0453	0.005	0.00112	0.0001	3.98	0.15	0.282182	5.2e-05
2017-447 - 140	4.54	0.49	0.309	0.014	0.32891	3.23625	0.146626	0.104	0.011	0.13096	1705	95	1744	70	1640	200	concordant	1744	70
2017-447 - 141	2.65	0.29	0.2256	0.009	0.26989	4.43262	0.176833	0.0848	0.0091	0.036339	1295	87	1309	47	1210	250	concordant	1309	47	1.46706	0.00019	1.88671	0.00021	0.279843	4e-05	0.02506	0.0004	0.000729	1.4e-05	4.09	0.2	0.281921	4.7e-05		1309	47	-1.7	0.5
2017-447 - 142	1.513	0.094	0.1093	0.0041	0.54382	9.14913	0.343197	0.1004	0.0055	0.18161	928	38	668	24	1590	100	discordant			1.46698	0.00021	1.88677	0.00023	0.280138	5.6e-05	0.02982	0.00058	0.000831	1.2e-05	3.54	0.14	0.282213	6.3e-05
2017-447 - 143	1.93	0.27	0.188	0.01	-0.17055	5.31915	0.282934	0.077	0.012	0.52676	1061	93	1106	54	940	330	concordant	1106	54	1.46696	0.00025	1.88695	0.00033	0.28034	0.0001	0.4151	0.0056	0.00966	0.00014	1.99	0.12	0.282389	9.7e-05		1106	54	3.8	1
2017-447 - 145	3.38	0.26	0.2282	0.0085	0.18735	4.38212	0.163225	0.1063	0.009	0.23819	1500	59	1323	45	1700	150	discordant
2017-447 - 146	3.47	0.39	0.209	0.012	0.31682	4.78469	0.274719	0.123	0.015	0.25848	1550	96	1222	63	2020	190	discordant			1.46726	0.00019	1.88676	0.00018	0.280032	5.4e-05	0.05647	0.00047	0.0014822	9.7e-06	4.058	0.074	0.282083	5.9e-05
2017-447 - 147	4.6	0.28	0.2651	0.0072	0.37462	3.77216	0.10245	0.1234	0.0074	0.15707	1750	53	1515	37	2000	110	discordant			1.46698	0.00022	1.88681	0.00026	0.280054	4.9e-05	0.0333	0.0017	0.000922	4e-05	3.025	0.089	0.282104	5.4e-05
2017-447 - 148	2.62	0.42	0.2029	0.0087	0.12042	4.92854	0.211327	0.093	0.015	0.25706	1270	110	1189	47	1320	310	concordant	1189	47	1.46703	0.00029	1.88696	0.00029	0.279723	5.9e-05	0.0752	0.0018	0.001904	3.9e-05	2.69	0.11	0.281775	5.9e-05		1189	47	-10.5	0.6
2017-447 - 149	2.5	0.28	0.2	0.011	0.27341	5	0.275	0.091	0.01	0.27652	1290	82	1171	60	1420	220	discordant			1.46717	0.0002	1.887	0.00022	0.28019	4.6e-05	0.09	0.012	0.00188	0.00019	3.36	0.14	0.282254	4.6e-05
2017-447 - 152	3.67	0.27	0.236	0.0056	0.14476	4.23729	0.100546	0.1108	0.0084	0.18068	1547	59	1365	29	1780	140	discordant
2017-447 - 153	5.53	0.5	0.2877	0.0089	0.1311	3.47584	0.107525	0.135	0.012	0.21343	1886	78	1628	44	2110	170	discordant			1.46715	0.00016	1.88679	0.00018	0.279961	4.6e-05	0.05127	0.00039	0.001415	1.1e-05	3.761	0.097	0.281973	4.6e-05
2017-447 - 154	2.53	0.46	0.2	0.0099	0.13556	5	0.2475	0.092	0.017	0.20473	1210	130	1173	53	1160	380	concordant	1173	53	1.46699	0.00019	1.88643	0.0002	0.2799	5.4e-05	0.03281	0.00031	0.0009695	6.5e-06	3.53	0.092	0.281968	5.9e-05		1173	53	-3.2	0.6
2017-447 - 155	2.39	0.59	0.214	0.016	-0.13943	4.6729	0.349376	0.076	0.02	0.49482	1200	170	1243	86	900	500	concordant	1243	86	1.46698	0.00023	1.88656	0.00027	0.280185	6.5e-05	0.0478	0.0031	0.001264	7.7e-05	2.83	0.16	0.282265	7.3e-05		1243	86	8.6	0.7
2017-447 - 156	2.33	0.81	0.205	0.02	0.043016	4.87805	0.475907	0.082	0.03	0.26364	830	350	1190	110	350	730	discordant			1.46703	0.00024	1.88682	0.00031	0.280123	6.5e-05	0.0251	0.00093	0.000715	2.3e-05	3.46	0.12	0.28218	6.9e-05
2017-447 - 157	2.57	0.61	0.212	0.014	-0.23987	4.71698	0.311499	0.092	0.022	0.45953	1310	170	1236	73	930	560	concordant	1236	73	1.46701	0.00014	1.88656	0.00024	0.280152	4.7e-05	0.017948	6.3e-05	0.000511	1.5e-06	3.33	0.11	0.282211	5.8e-05		1236	73	7.1	0.6
2017-447 - 158	2.04	0.21	0.1842	0.0066	0.062247	5.42888	0.19452	0.0804	0.0085	0.25583	1112	74	1089	36	1110	230	concordant	1089	36	1.46703	0.00017	1.88674	0.00016	0.280098	4.6e-05	0.0216	0.0012	0.000615	3.2e-05	3.63	0.14	0.282159	5.2e-05		1089	36	2	0.5
2017-447 - 159	3.58	0.31	0.2513	0.0085	0.10994	3.97931	0.134597	0.1029	0.0095	0.21538	1532	69	1444	44	1670	160	discordant			1.46718	0.00014	1.88662	0.00026	0.280147	4.7e-05	0.0376	0.00081	0.000987	1.7e-05	4	0.13	0.282183	5e-05
2017-447 - 160	2.7	0.98	0.207	0.017	0.082111	4.83092	0.396742	0.092	0.034	0.020275	1300	290	1209	92	420	790	concordant	1209	92	1.46706	0.00019	1.88682	0.00016	0.280059	4.7e-05	0.03094	0.00084	0.000882	2e-05	4.15	0.15	0.282102	5.3e-05		1209	92	2.4	0.5
2017-447 - 161	2.23	0.2	0.1926	0.0063	0.094601	5.19211	0.169835	0.0846	0.0076	0.30877	1167	64	1135	34	1250	190	concordant	1135	34	1.46694	0.00014	1.88647	0.00021	0.280174	4.3e-05	0.0193	0.0013	0.000547	3.4e-05	3.44	0.14	0.282248	4.5e-05		1135	34	6.2	0.5
2017-447 - 162	2.57	0.25	0.2089	0.0069	0.3778	4.78698	0.158115	0.0893	0.0087	0.089409	1276	72	1222	37	1350	180	concordant	1222	37	1.46698	0.00021	1.88686	0.00022	0.280091	5.5e-05	0.0612	0.0023	0.00161	5.3e-05	3.88	0.25	0.282137	5.7e-05		1222	37	3.3	0.6
2017-447 - 163	4.96	0.41	0.2958	0.0087	0.40222	3.38066	0.0994312	0.1191	0.0092	-0.038848	1799	69	1669	43	1970	140	discordant			1.46708	0.00014	1.8868	0.00022	0.280168	6.5e-05	0.03836	0.0005	0.001038	1.1e-05	4.03	0.18	0.282236	6e-05
2017-447 - 164	2.39	0.26	0.2005	0.006	0.093748	4.98753	0.149253	0.0868	0.0095	0.17014	1274	82	1177	32	1340	220	discordant			1.46715	0.00018	1.88676	0.00024	0.27987	3.8e-05	0.0332	0.0023	0.000919	5.5e-05	3.96	0.15	0.281922	3.8e-05
Llanoria Formation, Western Texas (This Study)
Multi-collector ICPMS Data -NERC Isotope Centre (see Methods page)
U-Pb data from Spencer, C.J., Prave, A.R., Cawood, P.A., Roberts, N.M.W., 2014. Detrital zircon geochronology of the Grenville/Llano foreland and basal Sauk Sequence in west Texas, USA. Geol. Soc. Am. Bull. 126, 1117–1128.
Spot	Age	2s	disc	eHf	2s	2s+	TDM	Hf/Hf (t)	Hf/Hf CHUR(t)	Hf/Hf DM(t)
CS12-1_2	2675.26	19.3583	0.015523	-0.652264	1.30726	2.24426	2995.59	0.281048	0.281066	0.281286
CS12-1_4	1861.08	27.4226	0.0295636	2.83332	1.50013	2.19379	2156.58	0.281678	0.281598	0.281895
CS12-1_5	1264.15	36.0366	-0.00489381	4.95311	1.57852	2.27172	1553.75	0.282123	0.281983	0.282335
CS12-1_6	1250.38	23.8837	0.0192355	-0.148543	1.49928	1.94042	1743.46	0.281988	0.281992	0.282345
CS12-1_7	1248.77	37.7649	-0.0186656	2.60753	1.71783	2.48917	1634.64	0.282067	0.281993	0.282346
CS12-1_8	1833.98	23.5607	0.0412268	-3.83442	1.32897	1.9255	2386.58	0.281508	0.281616	0.281915
CS12-1_9	1416.45	26.8852	0.0350264	14.17	2.48528	4.00931	1320.92	0.282285	0.281886	0.282223
CS12-1_10	1232.3	19.92	0.00160983	-1.11314	1.55209	1.87794	1763.05	0.281972	0.282004	0.282358
CS12-1_12	1462.29	23.6419	0.0178261	6.42747	1.35091	1.83999	1673.32	0.282037	0.281856	0.282189
CS12-1_13	1376.34	22.7986	0.0404305	9.06977	1.55143	1.99676	1493.74	0.282167	0.281911	0.282253
CS12-1_14	1483.34	26.9707	0.0183534	8.46998	1.44784	2.01589	1608.69	0.282081	0.281843	0.282174
CS12-1_16	1287.41	39.802	0.0437889	-17.0853	1.30654	2.08546	2410.46	0.281487	0.281968	0.282318
CS12-1_17	1218.02	20.9881	0.00523437	4.53967	1.35074	1.69686	1530.46	0.282141	0.282013	0.282369
CS12-1_18	1836.56	17.9314	0.00644325	0.109513	1.44901	1.91812	2240.38	0.281617	0.281614	0.281913
CS12-1_19	1242.48	19.6415	-0.00790218	-1.88213	1.57909	1.91787	1803.13	0.281944	0.281997	0.282351
CS12-1_20	1237.17	23.0652	-0.00561617	3.46777	1.47316	1.8759	1592.94	0.282099	0.282001	0.282355
CS12-1_22	1124.01	28.2811	0.0296919	4.17868	1.4226	1.91908	1469.64	0.282191	0.282073	0.282438
CS12-1_27	1855.94	22.2455	-0.00136773	2.32662	1.44889	2.11705	2171.2	0.281667	0.281602	0.281899
CS12-1_28	1470.04	26.9467	0.0189733	7.27975	1.3744	2.09585	1645.48	0.282056	0.281851	0.282184
CS12-1_29	1205.93	21.491	-0.011199	0.478938	1.55189	1.92616	1680.75	0.282034	0.282021	0.282378
CS12-1_30	1442.55	21.8227	0.00205005	8.31634	1.49892	1.9406	1580.31	0.282103	0.281869	0.282204
CS12-1_31	1278.34	22.5632	0.0477546	7.22096	1.89273	2.39852	1478.82	0.282178	0.281974	0.282325
CS12-1_34	2737.62	21.3316	-0.0153825	0.598407	2.39775	3.35042	3000.95	0.281042	0.281025	0.28124
CS12-1_36	1477.81	20.813	-0.0419142	7.57698	1.26241	1.68226	1638.27	0.28206	0.281846	0.282178
CS12-1_39	1426.83	23.6312	-0.0464025	4.40422	2.07569	3.59666	1734.67	0.282003	0.281879	0.282215
CS12-1_41	1235.44	23.9468	-0.000182801	3.78179	1.22187	1.64728	1576.17	0.282108	0.282002	0.282356
CS12-1_42	1429.57	23.7891	-0.0376334	7.83685	1.47321	1.94467	1584.88	0.282098	0.281877	0.282213
CS12-1_45	1888.85	20.0371	-0.0316389	0.305381	1.37541	1.97888	2280.07	0.281589	0.28158	0.281874
CS12-1_46	1479.13	22.3559	-0.0165664	5.73258	1.2625	1.72132	1710.4	0.282007	0.281845	0.282177
CS12-1_47	1254.1	20.4622	-0.00640529	2.31875	1.26242	1.61682	1648.95	0.282055	0.28199	0.282342
CS12-1_49	1252.08	21.9738	0.0057388	-3.02412	1.37476	1.75479	1856.37	0.281906	0.281991	0.282344
CS12-1_56	1476.72	19.1	0.0257487	6.68348	1.30551	1.69607	1673.52	0.282035	0.281847	0.282179
CS12-1_57	1503.2	22.2364	0.00818284	4.45544	1.24199	1.71054	1779.3	0.281955	0.28183	0.282159
CS12-1_58	1836.24	23.332	-0.0143006	0.0825372	1.32872	1.94796	2246.05	0.281617	0.281614	0.281913
CS12-1_59	1455.97	27.6312	-0.0168882	5.641	1.37452	1.93735	1693.45	0.282019	0.28186	0.282194
CS12-1_60	1258.44	20.2527	-0.00376355	-0.107416	1.42305	1.78861	1768.42	0.281984	0.281987	0.282339
CS12-1_61	1422.85	26.7247	-0.0220654	7.19284	1.32782	1.93885	1609.66	0.282084	0.281881	0.282218
CS12-1_64	1472.91	20.0989	0.000929489	8.0161	1.47318	1.8966	1620.08	0.282075	0.281849	0.282182
CS12-1_73	1790.65	22.138	-0.0465285	0.119284	1.60723	2.18731	2207.23	0.281647	0.281644	0.281947

## Sheet: Standards
Standard data for LA-MC-ICPMS analyses (Arizona Laserchron Centre, University of Arizona)
Sample	176Hf/177Hf	1SE
MT	0.282467	2.48508e-05
MT	0.282474	2.01603e-05
MT	0.282493	2.89999e-05
MT	0.2825	1.98745e-05
MT	0.282505	2.58514e-05
MT	0.282511	2.8544e-05
MT	0.282514	2.54429e-05
MT	0.282517	2.20943e-05
MT	0.282523	2.44938e-05
MT	0.282525	2.80983e-05
MT	0.282529	2.36155e-05
MT	0.282529	2.58258e-05
MT	0.282536	3.00681e-05
MT	0.282537	2.55642e-05
MT	0.282539	2.39163e-05
MT	0.28254	2.95923e-05
MT	0.282543	2.97387e-05
MT	0.282544	2.39757e-05
MT	0.282545	2.67943e-05
MT	0.282546	2.82204e-05
MT	0.282548	3.05558e-05
MT	0.282549	2.58292e-05
MT	0.28255	2.48018e-05
MT	0.282551	3.72993e-05
MT	0.282554	2.84232e-05
MT	0.282555	3.00882e-05
MT	0.282555	2.66034e-05
MT	0.282556	2.95757e-05
MT	0.282558	2.5351e-05
MT	0.282559	2.3797e-05
MT	0.282559	3.53349e-05
MT	0.28256	2.62527e-05
MT	0.28256	2.99796e-05
MT	0.282561	3.2302e-05
MT	0.282569	2.18302e-05
MT	0.28257	1.56481e-05
MT	0.28257	3.28996e-05
MT	0.28257	2.79115e-05
MT	0.28257	2.79115e-05
MT	0.282574	2.14113e-05
MT	0.282574	3.20192e-05
MT	0.282578	2.79735e-05
MT	0.28258	2.83812e-05
MT	0.282589	2.65114e-05
MT	0.282594	2.14744e-05
MT	0.282594	3.41503e-05
MT	0.282595	2.0496e-05
MT	0.282599	3.14796e-05
MT	0.282601	2.59314e-05
MT	0.282604	2.39052e-05
MT	0.28261	2.50542e-05
Average	0.282552	2.6802e-05
Recommended	0.282507	Woodhead, J.D., and Hergt, J.M., 2005, A preliminary appraisal of seven natural zircon reference materials for in situ Hf isotope determination: Geostandards and Geoanalytical Research, v. 29 (2), p. 183-195.
Sample	176Hf/177Hf	1SE
91500	0.28219	4.30905e-05
91500	0.282199	3.57302e-05
91500	0.282229	3.72589e-05
91500	0.282235	3.27392e-05
91500	0.282236	3.36619e-05
91500	0.282253	3.92737e-05
91500	0.282255	3.69558e-05
91500	0.282255	3.69558e-05
91500	0.282257	4.52758e-05
91500	0.282263	3.66003e-05
91500	0.282272	3.1259e-05
91500	0.282272	3.23922e-05
91500	0.282277	3.331e-05
91500	0.282284	4.22585e-05
91500	0.282286	4.47924e-05
91500	0.282288	3.32273e-05
91500	0.28229	3.33263e-05
91500	0.282296	3.61954e-05
91500	0.282298	3.42434e-05
91500	0.2823	3.87883e-05
91500	0.282301	3.775e-05
91500	0.282301	3.3972e-05
91500	0.282306	3.08133e-05
91500	0.282306	4.37886e-05
91500	0.282309	4.01411e-05
91500	0.282314	3.48923e-05
91500	0.282324	2.57059e-05
91500	0.282324	3.21077e-05
91500	0.282325	3.02404e-05
91500	0.282329	3.35101e-05
91500	0.28233	3.8658e-05
91500	0.282333	3.01155e-05
91500	0.282339	3.47497e-05
91500	0.282341	3.33665e-05
91500	0.282341	3.20156e-05
91500	0.282344	3.93673e-05
91500	0.282346	3.45775e-05
91500	0.282346	4.01102e-05
91500	0.28235	3.38948e-05
91500	0.282352	3.13398e-05
91500	0.282353	3.65986e-05
91500	0.282372	3.90895e-05
91500	0.282373	3.2381e-05
91500	0.282374	4.07474e-05
91500	0.282384	5.00487e-05
91500	0.282387	4.00547e-05
91500	0.282389	3.73228e-05
91500	0.2824	3.97227e-05
91500	0.28242	2.8759e-05
Average	0.282311	3.61873e-05
Recommended	0.282306	Woodhead, J.D., and Hergt, J.M., 2005, A preliminary appraisal of seven natural zircon reference materials for in situ Hf isotope determination: Geostandards and Geoanalytical Research, v. 29 (2), p. 183-195.
	0.282313	Blichert-Toft, J., 2007, The isotopic composition of zircon reference material 91500: Chemical Geology, v. 253, p. 252-257.
	0.282311	Vervoort, J.D., 2010, Hf analysis in zircon by LA-MC-ICPMS: Promise and pitfalls: Geological Society of America Abstracts with Programs, v. 42 (5), p. 667.
Sample	176Hf/177Hf	1SE
SL	0.281592	4.7118e-05
SL	0.281603	3.7277e-05
SL	0.281623	2.77844e-05
SL	0.281625	2.93119e-05
SL	0.281628	2.02728e-05
SL	0.281635	2.48105e-05
SL	0.281639	3.14809e-05
SL	0.281641	2.12231e-05
SL	0.281647	3.58293e-05
SL	0.281653	2.64107e-05
SL	0.281654	3.67849e-05
SL	0.281656	2.88552e-05
SL	0.281657	3.1503e-05
SL	0.28166	2.37648e-05
SL	0.281663	3.81804e-05
SL	0.281664	2.25341e-05
SL	0.281666	2.78582e-05
SL	0.281668	2.07694e-05
SL	0.281668	2.90616e-05
SL	0.281669	2.32348e-05
SL	0.281673	2.82378e-05
SL	0.281674	2.71008e-05
SL	0.281674	2.71008e-05
SL	0.281674	3.15149e-05
SL	0.281674	2.38961e-05
SL	0.281677	2.92307e-05
SL	0.281682	2.6124e-05
SL	0.281684	3.09561e-05
SL	0.281686	3.7597e-05
SL	0.281687	2.4051e-05
SL	0.281688	3.10416e-05
SL	0.28169	2.48102e-05
SL	0.281694	2.68634e-05
SL	0.281701	3.2618e-05
SL	0.281704	3.40384e-05
SL	0.281707	2.68652e-05
SL	0.281709	3.2057e-05
SL	0.281716	3.60083e-05
SL	0.28172	3.18261e-05
SL	0.281722	2.44067e-05
SL	0.281726	3.30316e-05
SL	0.281738	3.25499e-05
SL	0.28174	3.63187e-05
SL	0.281746	3.29311e-05
SL	0.281747	2.66201e-05
SL	0.281769	3.34658e-05
SL	0.281771	3.0369e-05
SL	0.281789	2.94459e-05
SL	0.282244	4.96433e-05
Average	0.281694	3.00976e-05
Recommended	0.28163	Woodhead, J.D., and Hergt, J.M., 2005, A preliminary appraisal of seven natural zircon reference materials for in situ Hf isotope determination: Geostandards and Geoanalytical Research, v. 29 (2), p. 183-195.
	0.281697	Ping, X., Fuyuan, W., Liewen, Xi., Yueheng, Y., 2004, Hf isotopic compositions of the standard zircons for U-Pb dating: Chinese Science Bulletin, v., 49, p. 1642-1648.
	0.281729	Wu, F.-Y., Yang, Y.H., Xie, L.W., Yang, J.H. and Xu, P., 2006, Hf isotopic compositions of the standard zircons and baddeleyites used in U–Pb geochronology: Chemical Geology, v. 234, p. 105–126.
Sample	176Hf/177Hf	1SE
PLES	0.282455	3.32098e-05
PLES	0.28246	2.137e-05
PLES	0.28246	2.34421e-05
PLES	0.282461	2.27829e-05
PLES	0.282461	3.9977e-05
PLES	0.282462	3.38367e-05
PLES	0.282463	2.90917e-05
PLES	0.282463	2.90515e-05
PLES	0.282467	3.4169e-05
PLES	0.282469	3.14984e-05
PLES	0.28247	2.23145e-05
PLES	0.282474	2.42373e-05
PLES	0.282475	2.29682e-05
PLES	0.282478	2.63545e-05
PLES	0.282479	2.48159e-05
PLES	0.282481	2.24073e-05
PLES	0.282486	3.40508e-05
PLES	0.282486	2.45995e-05
PLES	0.282486	4.45442e-05
PLES	0.282487	3.3994e-05
PLES	0.282493	2.7249e-05
PLES	0.282493	2.41386e-05
PLES	0.282493	3.89648e-05
PLES	0.282495	2.35885e-05
PLES	0.282498	3.10635e-05
PLES	0.2825	2.81848e-05
PLES	0.282501	2.30461e-05
PLES	0.282504	3.99921e-05
PLES	0.282505	2.09834e-05
PLES	0.282508	1.84571e-05
PLES	0.282512	1.9274e-05
PLES	0.282514	2.57448e-05
PLES	0.282518	2.32941e-05
PLES	0.282522	2.45086e-05
PLES	0.282524	3.07934e-05
PLES	0.282526	2.13442e-05
PLES	0.282526	2.13442e-05
PLES	0.282531	2.85309e-05
PLES	0.282531	3.36094e-05
PLES	0.282533	3.60162e-05
PLES	0.282538	2.90718e-05
PLES	0.282546	1.97271e-05
PLES	0.282547	2.8067e-05
PLES	0.282548	3.00266e-05
PLES	0.282549	3.00914e-05
PLES	0.282552	2.25373e-05
PLES	0.28256	3.32139e-05
Average	0.2825	2.79059e-05
Recommended	0.282484	Sláma, J., Kosler, J., Condon, D.J., Crowley, J.L., Gerdes, A., Hanchar, J.M., Horstwood, M.S.A., Morris, G.A., Nasdala, L., Norberg, N., Schaltegger, U., Schoene, B., Tubrett, M.N., and Whitehouse, M.J., 2008, Plesovice zircon - A new natural reference material for U-Pb and Hf isotopic microanalysis: Chemical Geology, v. 249, p. 1-35.
Sample	176Hf/177Hf	1SE
TEM	0.282595	2.40545e-05
TEM	0.282612	3.05903e-05
TEM	0.282615	2.7593e-05
TEM	0.282619	2.93247e-05
TEM	0.282625	2.54002e-05
TEM	0.282633	3.73107e-05
TEM	0.282637	2.00854e-05
TEM	0.282637	2.779e-05
TEM	0.282643	3.25922e-05
TEM	0.282643	3.49995e-05
TEM	0.282644	2.68253e-05
TEM	0.282645	2.78276e-05
TEM	0.282645	3.03862e-05
TEM	0.282646	3.50534e-05
TEM	0.282648	3.27605e-05
TEM	0.282652	3.7649e-05
TEM	0.282652	2.45526e-05
TEM	0.282657	3.21279e-05
TEM	0.282657	2.95973e-05
TEM	0.282662	3.22306e-05
TEM	0.282663	4.01033e-05
TEM	0.282665	2.8579e-05
TEM	0.282667	2.73689e-05
TEM	0.28267	3.1529e-05
TEM	0.282672	3.19227e-05
TEM	0.282673	3.60066e-05
TEM	0.282676	3.28921e-05
TEM	0.282676	2.97989e-05
TEM	0.282676	2.89525e-05
TEM	0.282678	2.57002e-05
TEM	0.282678	2.57002e-05
TEM	0.282683	2.75378e-05
TEM	0.282684	2.32004e-05
TEM	0.282689	3.13277e-05
TEM	0.282693	3.63854e-05
TEM	0.282698	2.87722e-05
TEM	0.282698	1.96531e-05
TEM	0.282701	2.84062e-05
TEM	0.282701	3.15021e-05
TEM	0.282704	3.20189e-05
TEM	0.282711	3.04577e-05
TEM	0.282714	3.35696e-05
TEM	0.282714	2.35195e-05
TEM	0.282717	4.08293e-05
TEM	0.282718	2.4696e-05
TEM	0.282736	2.77253e-05
TEM	0.282765	3.16692e-05
Average	0.28267	2.99697e-05
Recommended	0.282686	Woodhead, J.D., and Hergt, J.M., 2004, A preliminary appraisal of seven natural zircon reference materials for in situ Hf isotope determination: Geostandards and Geoanalytical Research, v. 29 (2), p. 183-195.
	0.282672	Vervoort, J.D., 2010, Hf analysis in zircon by LA-MC-ICPMS: Promise and pitfalls: Geological Society of America Abstracts with Programs, v. 42 (5), p. 667.
Sample	176Hf/177Hf	1SE
FC52	0.282049	4.20208e-05
FC53	0.282103	4.08669e-05
FC54	0.282104	2.44396e-05
FC55	0.282105	2.44291e-05
FC56	0.282112	3.63512e-05
FC57	0.282118	2.87396e-05
FC58	0.282122	4.60949e-05
FC59	0.282123	3.12196e-05
FC60	0.282127	2.60572e-05
FC61	0.282135	2.66882e-05
FC62	0.282136	4.91895e-05
FC63	0.282138	2.65359e-05
FC64	0.282148	2.97986e-05
FC65	0.282151	2.92006e-05
FC66	0.282152	3.05964e-05
FC67	0.282153	2.36577e-05
FC68	0.282156	2.94141e-05
FC69	0.282156	3.35316e-05
FC70	0.282163	2.81399e-05
FC71	0.282165	3.16335e-05
FC72	0.282167	2.902e-05
FC73	0.282171	2.98895e-05
FC74	0.282176	3.54294e-05
FC75	0.282178	5.02542e-05
FC76	0.282179	2.56442e-05
FC77	0.282184	4.10052e-05
FC78	0.282187	2.67866e-05
FC79	0.282187	2.54807e-05
FC80	0.282191	3.7128e-05
FC81	0.282193	3.53689e-05
FC82	0.282193	3.12379e-05
FC83	0.282194	2.48358e-05
FC84	0.282194	3.11817e-05
FC85	0.282194	2.89482e-05
FC86	0.282208	2.59703e-05
FC87	0.282213	2.36275e-05
FC88	0.282217	3.11306e-05
FC89	0.282221	2.94387e-05
FC90	0.282227	5.62511e-05
FC91	0.282228	3.6288e-05
FC92	0.282229	3.4773e-05
FC93	0.282232	3.72623e-05
FC94	0.282236	6.76249e-05
FC95	0.282244	4.96433e-05
FC96	0.282246	6.02276e-05
FC97	0.282253	3.57866e-05
FC98	0.282264	3.98583e-05
Average	0.282175	3.44404e-05
Recommended
	0.282184	Woodhead, J.D., and Hergt, J.M., 2004, A preliminary appraisal of seven natural zircon reference materials for in situ Hf isotope determination: Geostandards and Geoanalytical Research, v. 29 (2), p. 183-195.
	0.282179	Bahlburg, H., Vervoort, J.D., and DuFrane, S.A., 2010, Plate tectonic significance of Middle Cambrian and Ordovician siliciclastic rocks of the Bavarian facies, Armorican terrane assemblage, Germany -- U-Pb and Hf isotope evidence from detrital zircons: Gondwana Research, v. 17 (2-3), p. 223-235.
	0.282182	Vervoort, J.D., 2010, Hf analysis in zircon by LA-MC-ICPMS: Promise and pitfalls: Geological Society of America Abstracts with Programs, v. 42 (5), p. 667.
Sample	176Hf/177Hf	1SE
R33	0.282654	4.12543e-05
R34	0.282658	3.89196e-05
R35	0.282666	2.46381e-05
R36	0.282672	4.04433e-05
R37	0.282677	2.98787e-05
R38	0.282678	2.43054e-05
R39	0.282685	3.56805e-05
R40	0.282694	3.30673e-05
R41	0.282696	3.43605e-05
R42	0.282701	4.0567e-05
R43	0.282702	2.49951e-05
R44	0.282704	2.21535e-05
R45	0.282705	2.6806e-05
R46	0.282706	3.43032e-05
R47	0.282707	3.40955e-05
R48	0.28271	1.98373e-05
R49	0.282715	3.04656e-05
R50	0.282723	3.09194e-05
R51	0.282724	4.67051e-05
R52	0.282724	2.87552e-05
R53	0.282725	3.13071e-05
R54	0.282726	3.12565e-05
R55	0.282726	2.39134e-05
R56	0.282731	2.61148e-05
R57	0.282733	3.46598e-05
R58	0.282745	3.07841e-05
R59	0.282745	3.44551e-05
R60	0.282745	2.56761e-05
R61	0.282746	3.21458e-05
R62	0.28275	2.65744e-05
R63	0.282753	3.22885e-05
R64	0.282756	2.10834e-05
R65	0.282765	4.44898e-05
R66	0.282765	3.62033e-05
R67	0.282765	3.62033e-05
R68	0.282765	4.12181e-05
R69	0.282766	3.25715e-05
R70	0.282766	3.74825e-05
R71	0.282776	3.87902e-05
R72	0.282777	3.32761e-05
R73	0.282777	2.7036e-05
R74	0.28278	3.04498e-05
R75	0.282791	2.58393e-05
R76	0.282794	2.91041e-05
R77	0.282794	5.40094e-05
R78	0.282794	2.13271e-05
R79	0.282796	2.80871e-05
R80	0.282804	2.46093e-05
R81	0.282807	3.23985e-05
R82	0.282818	3.12183e-05
R83	0.282833	3.26123e-05
Average	0.28274	3.19478e-05
Recommended	0.282761	Bahlburg, H., Vervoort, J.D., and DuFrane, S.A., 2010, Plate tectonic significance of Middle Cambrian and Ordovician siliciclastic rocks of the Bavarian facies, Armorican terrane assemblage, Germany -- U-Pb and Hf isotope evidence from detrital zircons: Gondwana Research, v. 17 (2-3), p. 223-235.
	0.282767	Vervoort, J.D., 2010, Hf analysis in zircon by LA-MC-ICPMS: Promise and pitfalls: Geological Society of America Abstracts with Programs, v. 42 (5), p. 667.
